# Supplementary material for: Visible-light-induced cyclization of cyclic N-sulfonyl ketimines to N-sulfonamide fused imidazolidines
Source: Royal Society of Chemistry journal article supplement (doi:10.1039/d2ob00460g), 2022-01-01
Supplement: d2ob00460g1.pdf [file d2ob00460g1.pdf]

## Supporting Information

### Visible-Light-Induced Cyclization of Cyclic *N*-Sulfonyl Ketimines to *N*-Sulfonamides fused imidazolidines

Xiaotong Wang,<sup>a</sup> Anzai Shi,<sup>a</sup> Xian-Qiang Huang,<sup>b</sup> Xiaolan Chen,<sup>a\*</sup> Tiesheng Li,<sup>a\*</sup> Lingbo Qu,<sup>a</sup> Bing Yu<sup>a\*</sup>

<sup>a</sup> *Green Catalysis Center, College of Chemistry, Zhengzhou University, Zhengzhou 450001, China. Email: bingyu@zzu.edu.cn*

<sup>b</sup> *School of Chemistry & Chemical Engineering, Liaocheng University, Liaocheng, Shandong 252059, China*

### Table of Contents

|                                                                                       |           |
|---------------------------------------------------------------------------------------|-----------|
| <b>1. General Information .....</b>                                                   | <b>2</b>  |
| <b>1.1 Materials and instruments .....</b>                                            | <b>2</b>  |
| <b>1.2 The spectrum of the lamp and the visible-light irradiation instrument.....</b> | <b>2</b>  |
| <b>2. Experimental procedures .....</b>                                               | <b>3</b>  |
| <b>2.1 General experimental procedures for the to the desired product 3 .....</b>     | <b>3</b>  |
| <b>2.2. Unsuccessful substrates.....</b>                                              | <b>3</b>  |
| <b>2.3 Large scale synthesis under the irradiation of White LEDs .....</b>            | <b>3</b>  |
| <b>2.4 HRMS data analysis.....</b>                                                    | <b>4</b>  |
| <b>2.5 ESI-MS data analysis.....</b>                                                  | <b>5</b>  |
| <b>2.6 Procedure for emission quenching experiments .....</b>                         | <b>6</b>  |
| <b>3. Characterization Data for Products .....</b>                                    | <b>7</b>  |
| <b>4. NMR Copies of Products.....</b>                                                 | <b>17</b> |
| <b>5. Reference .....</b>                                                             | <b>51</b> |

# 1. General Information

## 1.1 Materials and instruments

All the chemicals were purchased from commercial suppliers, and used directly without further purification. Reactions were monitored by Thin Layer Chromatography (TLC) using UV light (254/365 nm) for detection. Products were purified by column chromatography, which was carried out on 200-300 mesh of silica gel purchased from Qing Dao Hai Yang Chemical Industry Co. All the  $^1\text{H}$ ,  $^{13}\text{C}$ , and  $^{19}\text{F}$  NMR spectra were recorded on Bruker Avance 400 MHz operating at 400 MHz, 101 MHz, and 376 MHz, respectively. Proton chemical shifts  $\delta$  were given in ppm using tetramethylsilane as internal standard. All NMR spectra were recorded in  $\text{CDCl}_3$  or  $\text{DMSO-d}_6$  at room temperature ( $20 \pm 3$  °C). High-resolution mass spectra (HRMS) were taken with a 3000-mass spectrometer, using Waters Q-ToF MS/MS system with the ESI technique. Emission intensities were recorded using an F-4600 FL spectrophotometer. The cyclic N-sulfonyl ketimines and phenylglycines are synthesized according to the reported procedure.<sup>1,2</sup>

## 1.2 The spectrum of the lamp and the visible-light irradiation instrument

Photochemical reaction was carried out under visible light irradiation by a white LED at 25 °C. RLH-18 8-position Photo Reaction System manufactured by Beijing Roger Tech Ltd. was used in this system. Eight 10W white LEDs were equipped in this Photo reactor. The reaction vessel is a borosilicate glass test tube and the distance between it and the lamp is 15 mm, no filter applied.

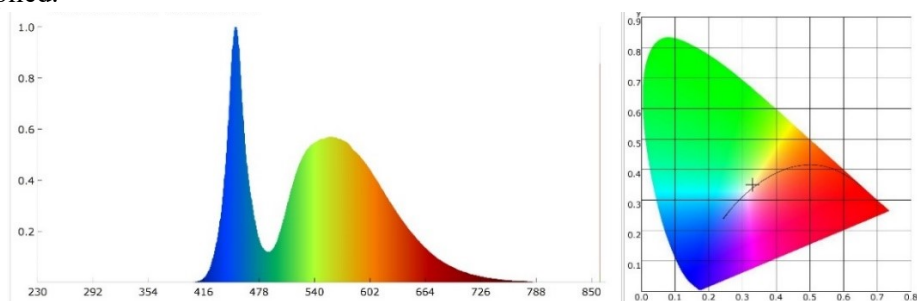

**Figure S1.** The spectrum of our lamp (white LED)

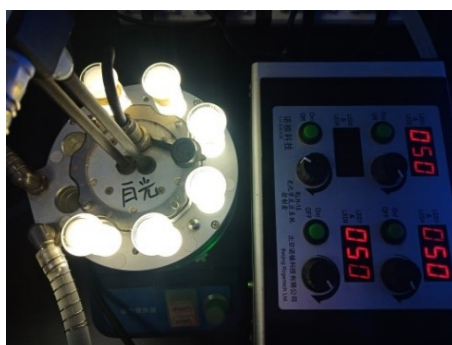

**Figure S2.** The visible-light irradiation instrument

## 2. Experimental procedures

### 2.1 General experimental procedures for the to the desired product 3

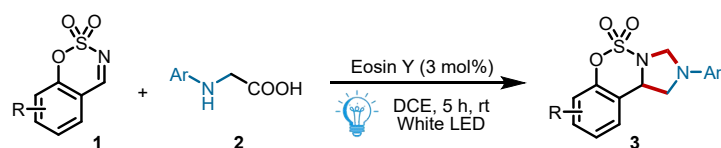

The mixture of cyclic *N*-sulfonyl ketimines **1** (0.1 mmol), phenylglycines **2** (0.3 mmol), Eosin Y (3 mol%) and DCE (1.5 mL) were sequentially added in a 25 mL reaction vessel. Then the reaction vessel was exposed to 5 W white LED irradiation at room temperature for 5 h. After the reaction, the solvent was evaporated under vacuum, all the crude products were purified by silica gel chromatography using petroleum ether/ethyl acetate (v/v = 15/1) as eluting solvent to give the desired products.

### 2.2. Unsuccessful substrates

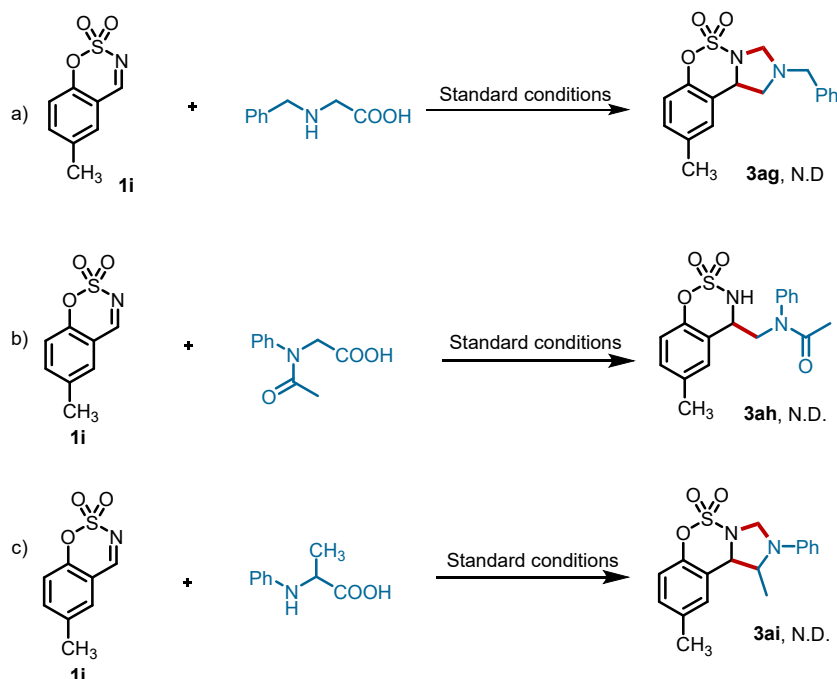

*N*-phenyl glycine, glycine bearing *N*-benzyl, *N*-acetyl,  $\alpha$ -methyl groups did not give the desired products, in which the starting materials were fully recovered.

### 2.3 Large scale synthesis under the irradiation of White LEDs

A 100 mL round bottom flask was charged with 6-(tert-butyl)benzo[e][1,2,3]oxathiazine 2,2-dioxide **1c** (4 mmol), *N*-phenylglycine **2a** (12 mmol) and Eosin Y (3 mol%), which were dissolved in DCE (25 mL). And then the reaction system was carried out under White LEDs for 24 h. After reaction, the residue was quenched with saturated NaHCO<sub>3</sub> solution (8 mL), and the ethyl acetate (15 mL) was added three times for extraction. The combined organic layers were dried over anhydrous Na<sub>2</sub>SO<sub>4</sub>. The residue was purified by silica gel

chromatography (petroleum ether/ethyl acetate = 15/1) to afford the desired product (1.03 g, 72%).

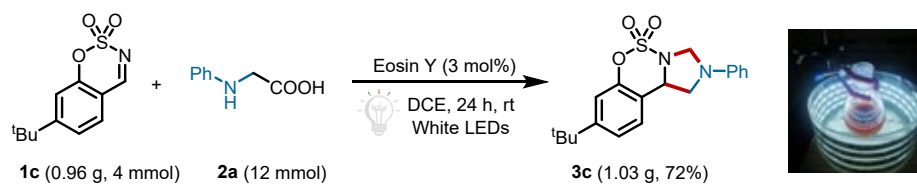

**Scheme S1.** Gram-scale synthesis of **3c**

## 2.4 HRMS data analysis

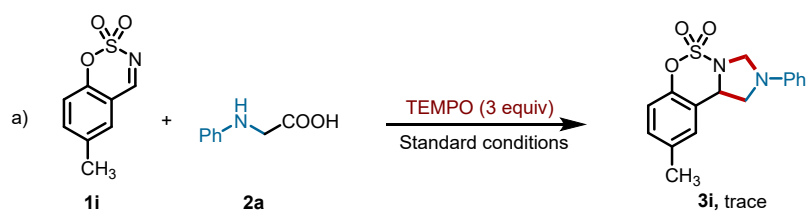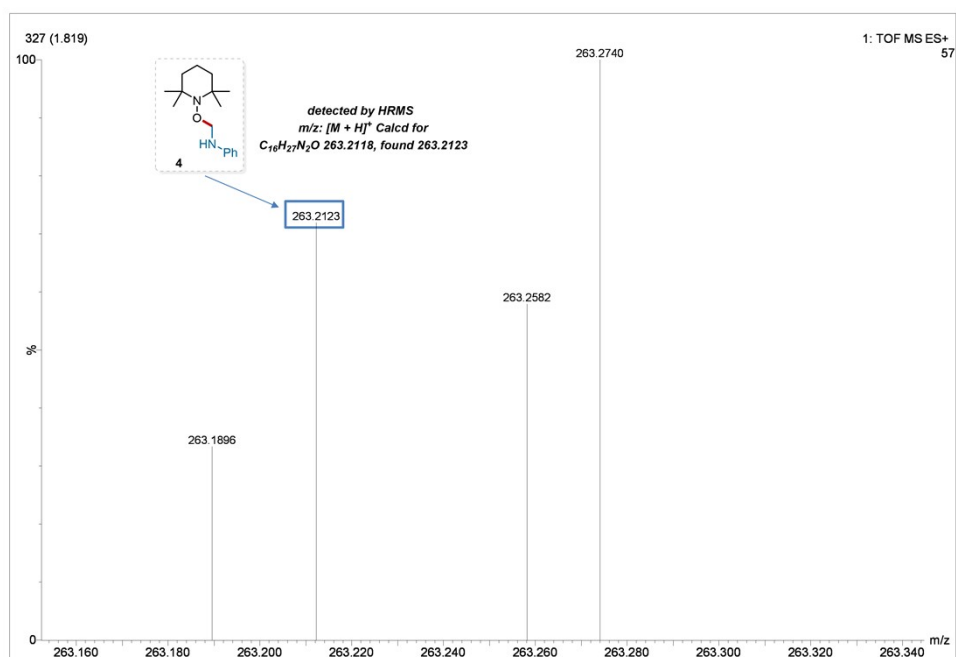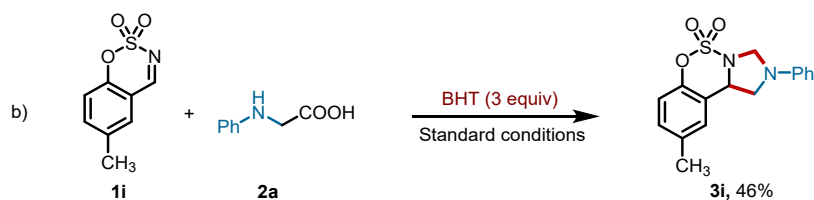

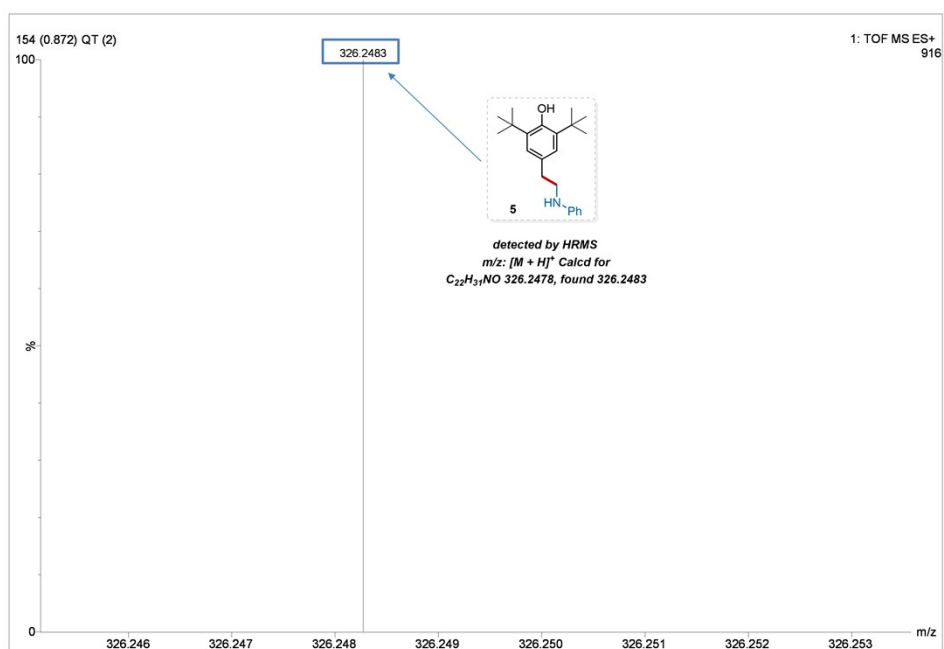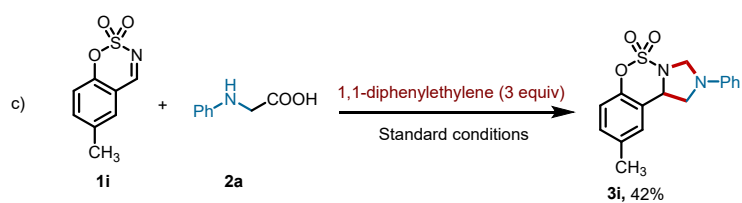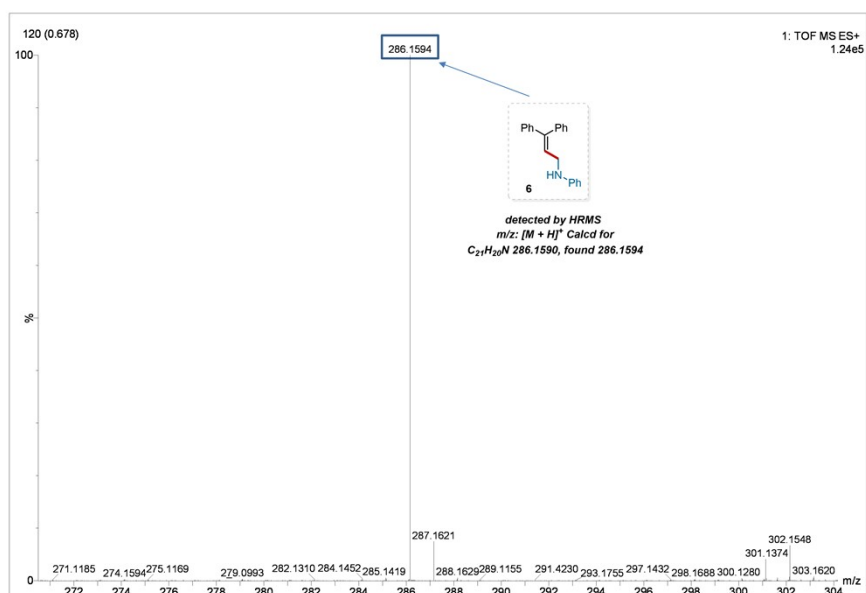

## 2.5 ESI-MS data analysis

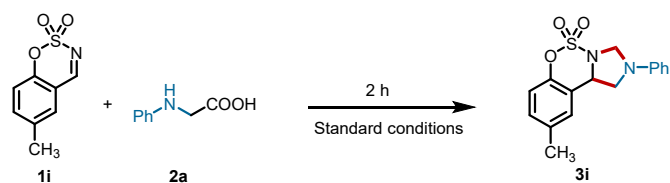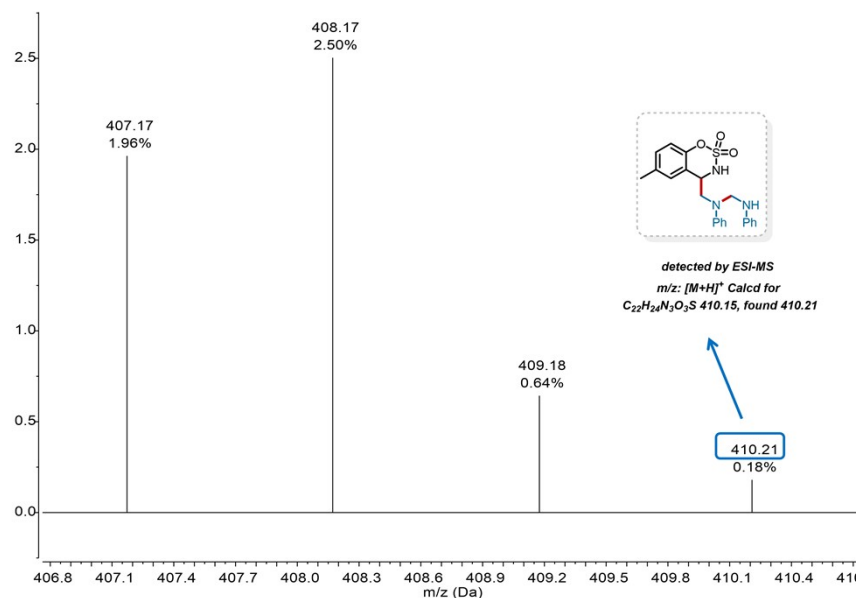

## 2.6 Procedure for emission quenching experiments

Stern-Volmer fluorescence quenching experiments were run with freshly prepared solution of  $5 \times 10^{-5}$  M solution of Eosin Y in degassed anhydrous DCE added the appropriate amount of a quencher in a screw-top quartz cuvette at room temperature. The solutions were irradiated at 470 nm and fluorescence was measured from 500 nm to 700 nm. The studies were conducted by mixing Eosin Y with **1a**, **2a**, respectively. As a result, a significant luminescence quenching effect was detected when Eosin Y was mixed with **2a** (Figure S3), As shown in Figure S4, a linear relationship between the concentration of 2a and  $I_0/I$  ( $I_0$  and  $I$  are the fluorescence intensities before and after adding **2a**) was observed. The results indicated that **2a** was an effective quencher of Eosin Y.

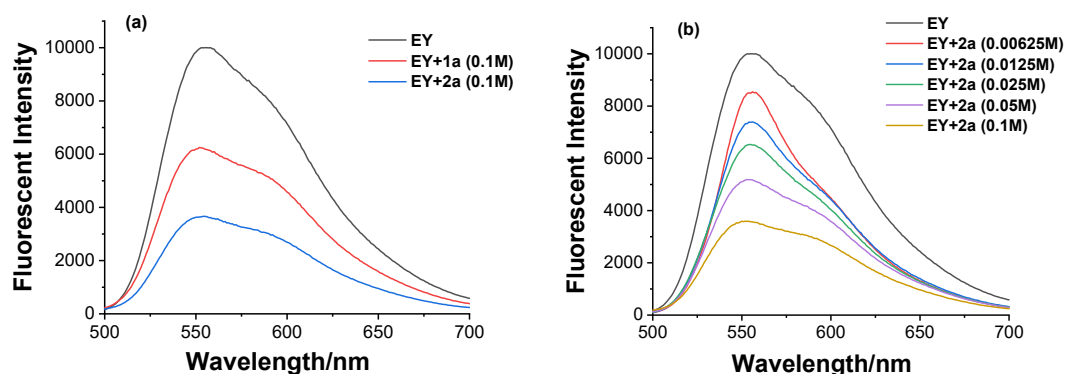

**Figure S3.** Luminescence quenching study: **(a)** the emission spectra of a  $5 \times 10^{-5}$  M solution of Eosin Y with reactants in degassed anhydrous DCE excited at 470 nm; **(b)** the emission spectra of a  $5 \times 10^{-5}$  M solution of Eosin Y with various concentrations of **2a** in degassed anhydrous DCE excited at 470 nm.

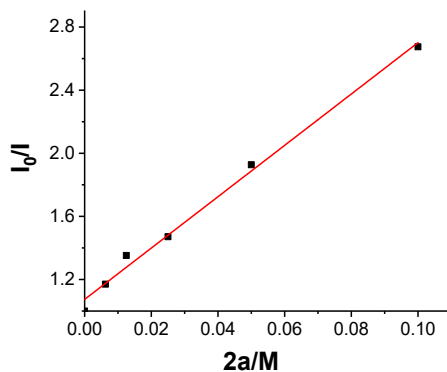

**Figure S4.** the linear relationship between  $I_0/I$  and the concentration of **2a**

### 3. Characterization Data for Products

*2-phenyl-1,2,3,10b-tetrahydrobenzo[e]imidazo[1,5-c][1,2,3]oxathiazine 5,5-dioxide (3a)*

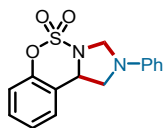

Purification by flash column chromatography (PE:EA, 100:1~15:1 v/v) to provide **3a**. White solid (25.4 mg, 84%); m.p. 77.2 – 78.8 °C;  $^1\text{H}$  NMR (400 MHz,  $\text{DMSO-}d_6$ )  $\delta$  7.57 (d,  $J = 7.4$  Hz, 1H), 7.44 – 7.39 (m, 1H), 7.34 (td,  $J = 7.5, 1.2$  Hz, 1H), 7.25 – 7.16 (m, 3H), 6.80 (t,  $J = 7.3$  Hz, 1H), 6.73 (d,  $J = 7.9$  Hz, 2H), 5.56 (d,  $J = 5.6$  Hz, 1H), 4.96 (d,  $J = 5.4$  Hz, 1H), 4.60 (d,  $J = 5.4$  Hz, 1H), 4.14 – 4.08 (m, 1H), 3.85 (dd,  $J = 9.9, 5.9$  Hz, 1H).  $^{13}\text{C}$  NMR (101 MHz,  $\text{DMSO-}d_6$ )  $\delta$  150.9, 145.8, 130.2, 129.6, 128.0, 126.6, 121.7, 119.3, 118.8, 114.2, 66.4, 62.1, 54.9. HRMS (ESI-TOF)  $m/z$ :  $[\text{M} + \text{H}]^+$  Calcd for  $\text{C}_{15}\text{H}_{15}\text{N}_2\text{O}_3\text{S}$ , 303.0798; Found: 303.0807.

*8-methyl-2-phenyl-1,2,3,10b-tetrahydrobenzo[e]imidazo[1,5-c][1,2,3]oxathiazine 5,5-dioxide (3b)*

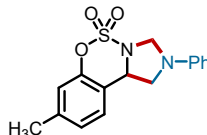

Purification by flash column chromatography (PE:EA, 100:1~15:1 v/v) to provide **3b**. White solid (25.9 mg, 82%); m.p. 169.8 – 170.9 °C;  $^1\text{H}$  NMR (400 MHz,  $\text{Chloroform-}d$ )  $\delta$  7.31 – 7.27 (m, 2H), 7.14 (d,  $J = 8.0$  Hz, 1H), 7.09 – 7.06 (m, 1H), 6.90 – 6.85 (m, 2H), 6.60 (d,  $J = 7.9$  Hz, 2H), 5.44 (t,  $J = 3.3$  Hz, 1H), 4.96 (d,  $J = 4.7$  Hz, 1H), 4.68 (d,  $J = 4.7$  Hz, 1H), 3.98 – 3.93 (m, 2H), 2.36 (s, 3H).  $^{13}\text{C}$  NMR (101 MHz,  $\text{Chloroform-}d$ )  $\delta$  150.8, 145.1, 140.4, 129.5, 126.9, 126.2, 119.20, 119.16, 117.6, 113.1, 66.0, 61.8, 54.5, 21.0. HRMS (ESI-TOF)  $m/z$ :  $[\text{M} + \text{H}]^+$  Calcd for  $\text{C}_{16}\text{H}_{17}\text{N}_2\text{O}_3\text{S}$ , 317.0954; Found: 317.0963.

*8-(tert-butyl)-2-phenyl-1,2,3,10b-tetrahydrobenzo[e]imidazo[1,5-c][1,2,3]oxathiazine 5,5-dioxide (3c)*

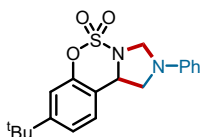

Purification by flash column chromatography (PE:EA, 100:1~15:1 v/v) to provide **3c**. White solid (27.9 mg, 78%); m.p. 182.1 – 183.5 °C; <sup>1</sup>H NMR (400 MHz, Chloroform-*d*) δ 7.31 – 7.27 (m, 3H), 7.19 (d, *J* = 8.2 Hz, 1H), 7.06 (d, *J* = 1.9 Hz, 1H), 6.87 (t, *J* = 7.4 Hz, 1H), 6.60 (d, *J* = 7.9 Hz, 2H), 5.45 (t, *J* = 3.5 Hz, 1H), 4.96 (d, *J* = 4.7 Hz, 1H), 4.69 (d, *J* = 4.7 Hz, 1H), 3.98 (d, *J* = 3.6 Hz, 2H), 1.32 (s, 9H). <sup>13</sup>C NMR (101 MHz, Chloroform-*d*) δ 153.8, 150.8, 145.0, 129.5, 126.1, 123.3, 119.1, 117.5, 115.8, 113.1, 65.9, 61.7, 54.4, 34.8, 31.0. HRMS (ESI-TOF) *m/z*: [M + H]<sup>+</sup> Calcd for C<sub>19</sub>H<sub>23</sub>N<sub>2</sub>O<sub>3</sub>S, 359.1424; Found: 359.1432.

*8-methoxy-2-phenyl-1,2,3,10b-tetrahydrobenzo[e]imidazo[1,5-c][1,2,3]oxathiazine 5,5-dioxide (3d)*

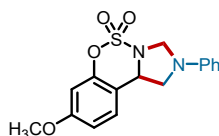

Purification by flash column chromatography (PE:EA, 100:1~15:1 v/v) to provide **3d**. White solid (27.6 mg, 83%); m.p. 100.1 – 101.2 °C; <sup>1</sup>H NMR (400 MHz, Chloroform-*d*) δ 7.30 – 7.26 (m, 2H), 7.15 (d, *J* = 8.7 Hz, 1H), 6.87 (t, *J* = 7.4 Hz, 1H), 6.82 (dd, *J* = 8.7, 2.6 Hz, 1H), 6.63 – 6.57 (m, 3H), 5.42 (dd, *J* = 5.0, 2.1 Hz, 1H), 4.96 (d, *J* = 4.7 Hz, 1H), 4.68 (d, *J* = 4.7 Hz, 1H), 3.97 – 3.92 (m, 2H), 3.81 (s, 3H). <sup>13</sup>C NMR (101 MHz, Chloroform-*d*) δ 160.5, 151.7, 145.1, 129.5, 127.1, 119.2, 113.1, 113.0, 112.4, 103.6, 65.9, 61.5, 55.7, 54.5. HRMS (ESI-TOF) *m/z*: [M + H]<sup>+</sup> Calcd for C<sub>16</sub>H<sub>17</sub>N<sub>2</sub>O<sub>4</sub>S, 333.0904; Found: 333.0912.

*8-(diethylamino)-2-phenyl-1,2,3,10b-tetrahydrobenzo[e]imidazo[1,5-c][1,2,3]oxathiazine 5,5-dioxide (3e)*

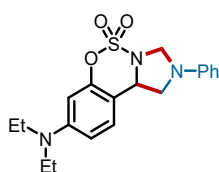

Purification by flash column chromatography (PE:EA, 100:1~10:1 v/v) to provide **3e**. Yellow solid (21.6 mg, 58%); m.p. 183.7 – 185.0 °C; <sup>1</sup>H NMR (400 MHz, Chloroform-*d*) δ 7.28 – 7.25 (m, 2H), 7.01 (d, *J* = 8.8 Hz, 1H), 6.84 (t, *J* = 7.4 Hz, 1H), 6.58 (d, *J* = 7.8 Hz, 2H), 6.52 (dd, *J* = 8.8, 2.6 Hz, 1H), 6.25 (d, *J* = 2.6 Hz, 1H), 5.38 (t, *J* = 4.0 Hz, 1H), 4.93 (d, *J* = 4.5 Hz, 1H), 4.68 (d, *J* = 4.6 Hz, 1H), 3.94 – 3.88 (m, 2H), 3.33 (q, *J* = 7.1 Hz, 4H), 1.16 (t, *J* = 7.1 Hz, 6H). <sup>13</sup>C NMR (101 MHz, Chloroform-*d*) δ 152.1, 148.8, 145.2, 129.4, 126.9, 118.8, 112.9, 109.5, 105.8, 100.4, 65.8, 61.5, 54.3, 44.5, 12.4. HRMS (ESI-TOF) *m/z*: [M + H]<sup>+</sup> Calcd for C<sub>19</sub>H<sub>24</sub>N<sub>3</sub>O<sub>3</sub>S, 374.1533; Found: 374.1541.

*8-chloro-2-phenyl-1,2,3,10b-tetrahydrobenzo[e]imidazo[1,5-c][1,2,3]oxathiazine 5,5-dioxide (3f)*



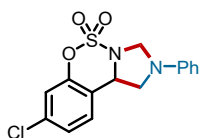

Purification by flash column chromatography (PE:EA, 100:1~15:1 v/v) to provide **3f**. White solid (25.5 mg, 76%); m.p. 140.1 – 140.9 °C; <sup>1</sup>H NMR (400 MHz, Chloroform-*d*) δ 7.31 – 7.24 (m, 3H), 7.21 (d, *J* = 8.6 Hz, 1H), 7.10 (d, *J* = 2.0 Hz, 1H), 6.93 – 6.87 (m, 1H), 6.62 – 6.59 (m, 2H), 5.43 (dd, *J* = 5.0, 1.5 Hz, 1H), 4.98 (d, *J* = 4.8 Hz, 1H), 4.67 (d, *J* = 4.8 Hz, 1H), 3.99 – 3.92 (m, 2H). <sup>13</sup>C NMR (101 MHz, Chloroform-*d*) δ 151.4, 144.9, 135.1, 129.5, 127.5, 126.3, 119.6, 119.5, 119.3, 113.4, 66.1, 61.7, 54.5. HRMS (ESI-TOF) *m/z*: [M + H]<sup>+</sup> Calcd for C<sub>15</sub>H<sub>14</sub>ClN<sub>2</sub>O<sub>3</sub>S, 337.0408; Found: 337.0418.

*8-bromo-2-phenyl-1,2,3,10b-tetrahydrobenzo[e]imidazo[1,5-c][1,2,3]oxathiazine 5,5-dioxide (3g)*

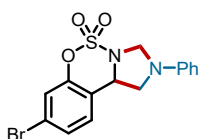

Purification by flash column chromatography (PE:EA, 100:1~15:1 v/v) to provide **3g**. White solid (29.3 mg, 77%); m.p. 143.7 – 145.2 °C; <sup>1</sup>H NMR (400 MHz, Chloroform-*d*) δ 7.40 (dd, *J* = 8.3, 1.9 Hz, 1H), 7.32 – 7.27 (m, 2H), 7.25 (d, *J* = 1.9 Hz, 1H), 7.17 – 7.12 (m, 1H), 6.90 (t, *J* = 7.4 Hz, 1H), 6.64 – 6.59 (m, 2H), 5.44 – 5.38 (m, 1H), 4.98 (d, *J* = 4.8 Hz, 1H), 4.66 (d, *J* = 4.8 Hz, 1H), 3.98 – 3.92 (m, 2H). <sup>13</sup>C NMR (101 MHz, Chloroform-*d*) δ 151.4, 144.9, 129.5, 129.2, 127.7, 122.6, 122.2, 120.0, 119.6, 113.4, 66.1, 61.7, 54.5. HRMS (ESI-TOF) *m/z*: [M + H]<sup>+</sup> Calcd for C<sub>15</sub>H<sub>14</sub><sup>79</sup>BrN<sub>2</sub>O<sub>3</sub>S, 380.9903; Found: 380.9913.

*2-phenyl-9-(trifluoromethoxy)-1,2,3,10b-tetrahydrobenzo[e]imidazo[1,5-c][1,2,3]oxathiazine 5,5-dioxide (3h)*

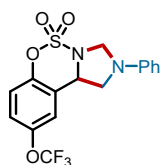

Purification by flash column chromatography (PE:EA, 100:1~15:1 v/v) to provide **3h**. White solid (22.4 mg, 58%); m.p. 130.2 – 131.1 °C; <sup>1</sup>H NMR (400 MHz, Chloroform-*d*) δ 7.35 – 7.28 (m, 2H), 7.23 (dd, *J* = 9.1, 2.3 Hz, 1H), 7.17 – 7.10 (m, 2H), 6.91 (t, *J* = 7.4 Hz, 1H), 6.63 (d, *J* = 7.9 Hz, 2H), 5.46 (d, *J* = 5.7 Hz, 1H), 5.00 (d, *J* = 4.9 Hz, 1H), 4.69 (d, *J* = 4.9 Hz, 1H), 4.02 – 3.93 (m, 2H). <sup>13</sup>C NMR (101 MHz, Chloroform-*d*) δ 149.2, 146.3 (q, *J* = 2.1 Hz), 144.8, 129.6, 122.62, 122.57, 120.6, 120.3 (q, *J* = 258.4 Hz), 119.7, 119.3, 113.4, 66.2, 61.8, 54.6. <sup>19</sup>F NMR (376 MHz, Chloroform-*d*) δ -58.17. HRMS (ESI-TOF) *m/z*: [M + H]<sup>+</sup> Calcd for C<sub>16</sub>H<sub>14</sub>F<sub>3</sub>N<sub>2</sub>O<sub>4</sub>S, 387.0621; Found: 387.0630.

*9-methyl-2-phenyl-1,2,3,10b-tetrahydrobenzo[e]imidazo[1,5-c][1,2,3]oxathiazine 5,5-dioxide (3i)*

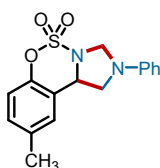

Purification by flash column chromatography (PE:EA, 100:1~15:1 v/v) to provide **3i**. White solid (26.9 mg, 85%); m.p. 155.6 – 157.5 °C; <sup>1</sup>H NMR (400 MHz, Chloroform-*d*) δ 7.31 – 7.27 (m, 2H), 7.16 – 7.12 (m, 1H), 7.05 (s, 1H), 6.96 (d, *J* = 8.4 Hz, 1H), 6.88 (t, *J* = 7.4 Hz, 1H), 6.64 – 6.59 (m, 2H), 5.43 (t, *J* = 3.6 Hz, 1H), 4.96 (d, *J* = 4.7 Hz, 1H), 4.68 (d, *J* = 4.7 Hz, 1H), 3.97 (d, *J* = 3.7 Hz, 2H), 2.37 (s, 3H). <sup>13</sup>C NMR (101 MHz, Chloroform-*d*) δ 148.9, 145.1, 135.9, 130.4, 129.5, 126.7, 120.3, 119.2, 118.7, 113.2, 66.0, 61.9, 54.4, 20.9. HRMS (ESI-TOF) *m/z*: [M + H]<sup>+</sup> Calcd for C<sub>16</sub>H<sub>17</sub>N<sub>2</sub>O<sub>3</sub>S, 317.0954; Found: 317.0963.

*9-fluoro-2-phenyl-1,2,3,10b-tetrahydrobenzo[e]imidazo[1,5-c][1,2,3]oxathiazine 5,5-dioxide (3j)*

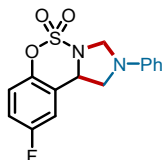

Purification by flash column chromatography (PE:EA, 100:1~15:1 v/v) to provide **3j**. White solid (21.8 mg, 68%); m.p. 152.1 – 153.5 °C; <sup>1</sup>H NMR (400 MHz, Chloroform-*d*) δ 7.33 – 7.28 (m, 2H), 7.07 – 7.06 (m, 2H), 7.02 – 6.97 (m, 1H), 6.90 (t, *J* = 7.4 Hz, 1H), 6.65 – 6.60 (m, 2H), 5.43 (d, *J* = 4.5 Hz, 1H), 4.98 (d, *J* = 4.8 Hz, 1H), 4.68 (d, *J* = 4.8 Hz, 1H), 4.00 – 3.93 (m, 2H). <sup>13</sup>C NMR (101 MHz, Chloroform-*d*) δ 159.7 (d, *J* = 246.7 Hz), 147.0 (d, *J* = 2.8 Hz), 144.9, 129.6, 122.5 (d, *J* = 7.0 Hz), 120.6 (d, *J* = 8.4 Hz), 119.6, 116.9 (d, *J* = 23.6 Hz), 113.4, 113.2 (d, *J* = 24.8 Hz), 66.1, 61.8 (d, *J* = 1.7 Hz), 54.5. <sup>19</sup>F NMR (376 MHz, Chloroform-*d*) δ -114.72. HRMS (ESI-TOF) *m/z*: [M + H]<sup>+</sup> Calcd for C<sub>15</sub>H<sub>14</sub>FN<sub>2</sub>O<sub>3</sub>S, 321.0704; Found: 321.0713.

*9-chloro-2-phenyl-1,2,3,10b-tetrahydrobenzo[e]imidazo[1,5-c][1,2,3]oxathiazine 5,5-dioxide (3k)*

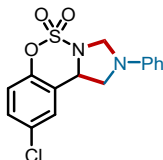

Purification by flash column chromatography (PE:EA, 100:1~15:1 v/v) to provide **3k**. White solid (24.2 mg, 72%); m.p. 180.8 – 182.1 °C; <sup>1</sup>H NMR (400 MHz, Chloroform-*d*) δ 7.34 – 7.27 (m, 4H), 7.03 (d, *J* = 8.8 Hz, 1H), 6.90 (t, *J* = 7.4 Hz, 1H), 6.65 – 6.61 (m, 2H), 5.43 (t, *J* = 3.5 Hz, 1H), 4.98 (d, *J* = 4.8 Hz, 1H), 4.67 (d, *J* = 4.8 Hz, 1H), 3.99 – 3.94 (m, 2H). <sup>13</sup>C NMR (101 MHz, Chloroform-*d*) δ 149.6, 144.9, 131.3, 129.9, 129.5, 126.5, 122.5, 120.4, 119.7, 113.4, 66.1, 61.7, 54.5. HRMS (ESI-TOF) *m/z*: [M + H]<sup>+</sup> Calcd for C<sub>15</sub>H<sub>14</sub>ClN<sub>2</sub>O<sub>3</sub>S, 337.0408; Found: 337.0417.

*9-bromo-2-phenyl-1,2,3,10b-tetrahydrobenzo[e]imidazo[1,5-c][1,2,3]oxathiazine 5,5-dioxide (3l)*

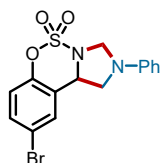

Purification by flash column chromatography (PE:EA, 100:1~15:1 v/v) to provide **3l**. White solid (27.4 mg, 72%); m.p. 170.5 – 172.3 °C; <sup>1</sup>H NMR (400 MHz, Chloroform-*d*) δ 7.48 – 7.45 (m, 1H), 7.42 (dd, *J* = 2.2, 0.7 Hz, 1H), 7.33 – 7.28 (m, 2H), 6.96 (d, *J* = 8.7 Hz, 1H), 6.91 (t, *J* = 7.4 Hz, 1H), 6.66 – 6.60 (m, 2H), 5.44 (t, *J* = 3.5 Hz, 1H), 4.98 (d, *J* = 4.8 Hz, 1H), 4.67 (d, *J* = 4.8 Hz, 1H), 3.96 (d, *J* = 3.6 Hz, 2H). <sup>13</sup>C NMR (101 MHz, Chloroform-*d*) δ 150.2, 144.9, 132.8, 129.5, 129.4, 122.9, 120.7, 119.7,

118.7, 113.4, 66.1, 61.6, 54.5. HRMS (ESI-TOF)  $m/z$ :  $[M + H]^+$  Calcd for  $C_{15}H_{14}^{79}BrN_2O_3S$ , 380.9903; Found: 380.9913.

*9-iodo-2-phenyl-1,2,3,10b-tetrahydrobenzo[e]imidazo[1,5-c][1,2,3]oxathiazine 5,5-dioxide (3m)*

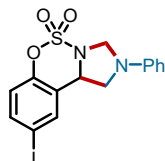

Purification by flash column chromatography (PE:EA, 100:1~15:1 v/v) to provide **3m**. White solid (26.1 mg, 61%); m.p. 190.8 – 191.9 °C;  $^1H$  NMR (400 MHz, Chloroform-*d*)  $\delta$  7.66 – 7.63 (m, 1H), 7.59 (dd,  $J = 2.0, 0.8$  Hz, 1H), 7.33 – 7.28 (m, 2H), 6.91 (t,  $J = 7.4$  Hz, 1H), 6.83 (d,  $J = 8.6$  Hz, 1H), 6.66 – 6.60 (m, 2H), 5.42 (t,  $J = 4.0$  Hz, 1H), 4.98 (d,  $J = 4.8$  Hz, 1H), 4.67 (d,  $J = 4.8$  Hz, 1H), 3.98 – 3.91 (m, 2H).  $^{13}C$  NMR (101 MHz, Chloroform-*d*)  $\delta$  151.0, 144.9, 138.7, 135.3, 129.5, 123.3, 120.9, 119.7, 113.4, 89.2, 66.1, 61.4, 54.5. HRMS (ESI-TOF)  $m/z$ :  $[M + H]^+$  Calcd for  $C_{15}H_{14}IN_2O_3S$ , 428.9764; Found: 428.9772.

*Methyl-2-phenyl-1,2,3,10b-tetrahydrobenzo[e]imidazo[1,5-c][1,2,3]oxathiazine-9-carboxylate 5,5-dioxide (3n)*

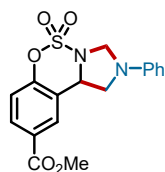

Purification by flash column chromatography (PE:EA, 100:1~10:1 v/v) to provide **3n**. White solid (28.4 mg, 79%); m.p. 174.2 – 175.4 °C;  $^1H$  NMR (400 MHz, Chloroform-*d*)  $\delta$  8.04 – 8.00 (m, 2H), 7.31 – 7.27 (m, 2H), 7.15 – 7.10 (m, 1H), 6.89 (t,  $J = 7.4$  Hz, 1H), 6.64 – 6.60 (m, 2H), 5.50 (d,  $J = 5.4$  Hz, 1H), 5.00 (d,  $J = 4.8$  Hz, 1H), 4.68 (d,  $J = 4.8$  Hz, 1H), 4.06 – 3.97 (m, 2H), 3.96 (s, 3H).  $^{13}C$  NMR (101 MHz, Chloroform-*d*)  $\delta$  165.4, 154.3, 144.9, 131.1, 129.5, 128.5, 128.0, 121.1, 119.6, 119.2, 113.4, 66.1, 61.8, 54.6, 52.5. HRMS (ESI-TOF)  $m/z$ :  $[M + H]^+$  Calcd for  $C_{17}H_{17}N_2O_5S$ , 361.0853; Found: 361.0860.

*7-methoxy-2-phenyl-1,2,3,10b-tetrahydrobenzo[e]imidazo[1,5-c][1,2,3]oxathiazine 5,5-dioxide (3o)*

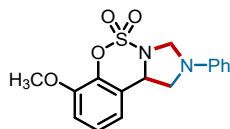

Purification by flash column chromatography (PE:EA, 100:1~15:1 v/v) to provide **3o**. White solid (28.6 mg, 86%); m.p. 138.7 – 139.5 °C;  $^1H$  NMR (400 MHz, DMSO-*d*<sub>6</sub>)  $\delta$  7.29 – 7.19 (m, 3H), 7.12 (d,  $J = 7.7$  Hz, 1H), 7.08 (d,  $J = 7.8$  Hz, 1H), 6.80 (t,  $J = 7.3$  Hz, 1H), 6.75 – 6.69 (m, 2H), 5.53 (d,  $J = 5.6$  Hz, 1H), 4.94 (d,  $J = 5.4$  Hz, 1H), 4.59 (d,  $J = 5.4$  Hz, 1H), 4.06 (dd,  $J = 9.9, 1.2$  Hz, 1H), 3.87 – 3.82 (m, 4H).  $^{13}C$  NMR (101 MHz, DMSO-*d*<sub>6</sub>)  $\delta$  148.4, 145.8, 140.1, 129.6, 126.3, 122.5, 119.3, 118.6, 114.3, 112.8, 66.4, 62.2, 56.5, 54.9. HRMS (ESI-TOF)  $m/z$ :  $[M + H]^+$  Calcd for  $C_{16}H_{17}N_2O_4S$ , 333.0904; Found: 333.0908.

7-allyl-2-phenyl-1,2,3,10b-tetrahydrobenzo[e]imidazo[1,5-c][1,2,3]oxathiazine 5,5-dioxide (**3p**)

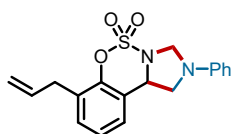

Purification by flash column chromatography (PE:EA, 100:1~15:1 v/v) to provide **3p**. White solid (28.4 mg, 83%); m.p. 105.6 – 107.3 °C; <sup>1</sup>H NMR (400 MHz, Chloroform-*d*) δ 7.31 – 7.27 (m, 2H), 7.23 – 7.18 (m, 2H), 7.13 (d, *J* = 6.8 Hz, 1H), 6.88 (t, *J* = 7.3 Hz, 1H), 6.62 (d, *J* = 8.1 Hz, 2H), 6.01 – 5.91 (m, 1H), 5.47 (d, *J* = 4.8 Hz, 1H), 5.19 – 5.07 (m, 2H), 4.98 (d, *J* = 4.8 Hz, 1H), 4.70 (d, *J* = 4.8 Hz, 1H), 4.02 – 3.95 (m, 2H), 3.52 – 3.40 (m, 2H). <sup>13</sup>C NMR (101 MHz, Chloroform-*d*) δ 149.1, 145.1, 135.0, 130.43, 130.37, 129.5, 125.6, 124.5, 120.8, 119.3, 116.9, 113.2, 66.2, 62.0, 54.8, 33.3. HRMS (ESI-TOF) *m/z*: [M + H]<sup>+</sup> Calcd for C<sub>18</sub>H<sub>19</sub>N<sub>2</sub>O<sub>3</sub>S, 343.1111; Found: 343.1119.

7,9-di-*tert*-butyl-2-phenyl-1,2,3,10b-tetrahydrobenzo[e]imidazo[1,5-c][1,2,3]oxathiazine 5,5-dioxide (**3q**)

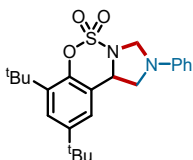

Purification by flash column chromatography (PE:EA, 100:1~15:1 v/v) to provide **3q**. White solid (31.9 mg, 77%); m.p. 196.5 – 198.2 °C; <sup>1</sup>H NMR (400 MHz, Chloroform-*d*) δ 7.36 (d, *J* = 2.2 Hz, 1H), 7.32 – 7.28 (m, 2H), 7.04 (d, *J* = 2.0 Hz, 1H), 6.88 (t, *J* = 7.4 Hz, 1H), 6.64 (d, *J* = 8.0 Hz, 2H), 5.44 (d, *J* = 5.6 Hz, 1H), 4.98 (d, *J* = 4.9 Hz, 1H), 4.75 (d, *J* = 4.9 Hz, 1H), 4.05 (dd, *J* = 9.0, 6.4 Hz, 1H), 3.90 (dd, *J* = 9.1, 1.8 Hz, 1H), 1.45 (s, 9H), 1.33 (s, 9H). <sup>13</sup>C NMR (101 MHz, Chloroform-*d*) δ 148.2, 147.9, 145.2, 139.4, 129.5, 124.5, 121.1, 120.5, 119.2, 113.3, 66.5, 62.2, 55.3, 35.1, 34.8, 31.4, 30.0. HRMS (ESI-TOF) *m/z*: [M + H]<sup>+</sup> Calcd for C<sub>23</sub>H<sub>31</sub>N<sub>2</sub>O<sub>3</sub>S, 415.2050; Found: 415.2056.

9-bromo-7-methoxy-2-phenyl-1,2,3,10b-tetrahydrobenzo[e]imidazo[1,5-c][1,2,3]oxathiazine 5,5-dioxide (**3r**)

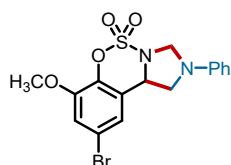

Purification by flash column chromatography (PE:EA, 100:1~15:1 v/v) to provide **3r**. White solid (25.8 mg, 63%); m.p. 193.3 – 194.8 °C; <sup>1</sup>H NMR (400 MHz, Chloroform-*d*) δ 7.32 – 7.27 (m, 2H), 7.04 (d, *J* = 2.0 Hz, 1H), 6.97 (dd, *J* = 2.1, 0.7 Hz, 1H), 6.89 (t, *J* = 7.4 Hz, 1H), 6.66 – 6.59 (m, 2H), 5.42 (t, *J* = 3.6 Hz, 1H), 4.99 (d, *J* = 4.8 Hz, 1H), 4.66 (d, *J* = 4.8 Hz, 1H), 3.94 (d, *J* = 3.7 Hz, 2H), 3.90 (s, 3H). <sup>13</sup>C NMR (101 MHz, Chloroform-*d*) δ 149.6, 144.9, 140.0, 129.5, 123.4, 120.2, 119.6, 118.4, 115.5, 113.4, 66.2, 61.8, 56.5, 54.4. HRMS (ESI-TOF) *m/z*: [M + H]<sup>+</sup> Calcd for C<sub>16</sub>H<sub>16</sub><sup>79</sup>BrN<sub>2</sub>O<sub>4</sub>S, 411.0009; Found: 411.0016.

7,9-dichloro-2-phenyl-1,2,3,10b-tetrahydrobenzo[e]imidazo[1,5-c][1,2,3]oxathiazine 5,5-dioxide (**3s**)

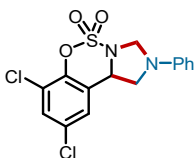

Purification by flash column chromatography (PE:EA, 100:1~15:1 v/v) to provide **3s**. White solid (27.4 mg, 74%); m.p. 154.6 – 155.4 °C; <sup>1</sup>H NMR (400 MHz, Chloroform-*d*) δ 7.44 (d, *J* = 2.1 Hz, 1H), 7.33 – 7.28 (m, 2H), 7.19 – 7.16 (m, 1H), 6.92 (t, *J* = 7.4 Hz, 1H), 6.64 (d, *J* = 7.8 Hz, 2H), 5.43 (t, *J* = 4.0 Hz, 1H), 5.03 (d, *J* = 4.9 Hz, 1H), 4.67 (d, *J* = 4.9 Hz, 1H), 3.99 – 3.93 (m, 2H). <sup>13</sup>C NMR (101 MHz, Chloroform-*d*) δ 145.9, 144.7, 130.9, 130.3, 129.6, 125.1, 124.8, 124.1, 120.0, 113.6, 66.3, 61.9, 54.7. HRMS (ESI-TOF) *m/z*: [M + H]<sup>+</sup> Calcd for C<sub>15</sub>H<sub>13</sub>Cl<sub>2</sub>N<sub>2</sub>O<sub>3</sub>S, 371.0018; Found: 371.0024.

*8,10-dichloro-2-phenyl-1,2,3,10b-tetrahydrobenzo[e]imidazo[1,5-c][1,2,3]oxathiazine 5,5-dioxide (3t)*

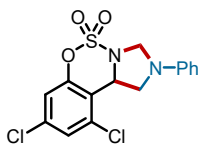

Purification by flash column chromatography (PE:EA, 100:1~15:1 v/v) to provide **3t**. White solid (31.1 mg, 84%); m.p. 131.4 – 133.2 °C; <sup>1</sup>H NMR (400 MHz, Chloroform-*d*) δ 7.36 – 7.29 (m, 3H), 7.05 (d, *J* = 2.0 Hz, 1H), 6.93 (t, *J* = 7.4 Hz, 1H), 6.72 – 6.68 (m, 2H), 5.45 (dd, *J* = 6.7, 2.5 Hz, 1H), 5.04 (d, *J* = 5.6 Hz, 1H), 4.72 (d, *J* = 5.6 Hz, 1H), 4.08 (dd, *J* = 10.1, 6.7 Hz, 1H), 4.00 (dd, *J* = 10.1, 2.6 Hz, 1H). <sup>13</sup>C NMR (101 MHz, Chloroform-*d*) δ 151.9, 144.9, 135.3, 133.3, 129.5, 127.4, 120.3, 119.5, 118.6, 114.2, 67.4, 61.3, 54.6. HRMS (ESI-TOF) *m/z*: [M + H]<sup>+</sup> Calcd for C<sub>15</sub>H<sub>13</sub>Cl<sub>2</sub>N<sub>2</sub>O<sub>3</sub>S, 371.0018; Found: 371.0027.

*7-bromo-9-chloro-2-phenyl-1,2,3,10b-tetrahydrobenzo[e]imidazo[1,5-c][1,2,3]oxathiazine 5,5-dioxide (3u)*

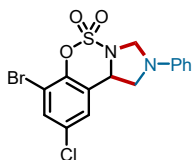

Purification by flash column chromatography (PE:EA, 100:1~15:1 v/v) to provide **3u**. White solid (33.5 mg, 81%); m.p. 202.7 – 204.4 °C; <sup>1</sup>H NMR (400 MHz, Chloroform-*d*) δ 7.60 (d, *J* = 2.3 Hz, 1H), 7.34 – 7.29 (m, 2H), 7.22 (d, *J* = 2.2 Hz, 1H), 6.92 (t, *J* = 7.4 Hz, 1H), 6.64 (d, *J* = 7.9 Hz, 2H), 5.43 (t, *J* = 4.0 Hz, 1H), 5.03 (d, *J* = 4.9 Hz, 1H), 4.66 (d, *J* = 4.9 Hz, 1H), 3.99 – 3.93 (m, 2H). <sup>13</sup>C NMR (101 MHz, Chloroform-*d*) δ 146.8, 144.7, 133.2, 131.3, 129.6, 125.5, 124.1, 120.0, 113.7, 113.6, 66.4, 62.0, 54.8. HRMS (ESI-TOF) *m/z*: [M + H]<sup>+</sup> Calcd for C<sub>15</sub>H<sub>13</sub><sup>79</sup>BrClN<sub>2</sub>O<sub>3</sub>S, 414.9513; Found: 414.9522.

*2-phenyl-1,2,3,12c-tetrahydroimidazo[1,5-c]naphtho[1,2-e][1,2,3]oxathiazine 5,5-dioxide (3v)*

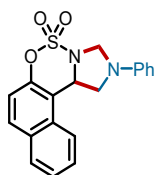

Purification by flash column chromatography (PE:EA, 100:1~15:1 v/v) to provide **3v**. White solid (21.8

mg, 62%); m.p. 151.2 – 152.3 °C; <sup>1</sup>H NMR (400 MHz, Chloroform-*d*) δ 7.91 (d, *J* = 8.1 Hz, 1H), 7.85 (d, *J* = 9.0 Hz, 1H), 7.74 – 7.65 (m, 2H), 7.59 – 7.55 (m, 1H), 7.29 – 7.24 (m, 2H), 7.19 (d, *J* = 9.0 Hz, 1H), 6.87 (t, *J* = 7.4 Hz, 1H), 6.63 (d, *J* = 7.9 Hz, 2H), 5.96 (dd, *J* = 7.0, 2.4 Hz, 1H), 5.07 (d, *J* = 5.2 Hz, 1H), 4.82 (d, *J* = 5.2 Hz, 1H), 4.31 – 4.27 (m, 1H), 3.99 (dd, *J* = 9.3, 2.6 Hz, 1H). <sup>13</sup>C NMR (101 MHz, Chloroform-*d*) δ 148.7, 145.1, 140.2, 131.7, 130.9, 130.0, 129.4, 127.9, 125.9, 122.5, 119.7, 118.4, 115.3, 113.8, 67.0, 61.0, 55.2. HRMS (ESI-TOF) *m/z*: [M + H]<sup>+</sup> Calcd for C<sub>19</sub>H<sub>17</sub>N<sub>2</sub>O<sub>3</sub>S, 353.0954; Found: 353.0958.

*9-methyl-2-(p-tolyl)-1,2,3,10b-tetrahydrobenzo[e]imidazo[1,5-c][1,2,3]oxathiazine 5,5-dioxide (3w)*

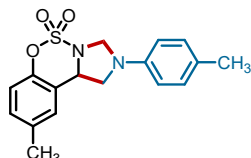

Purification by flash column chromatography (PE:EA, 100:1~15:1 v/v) to provide **3w**. White solid (27.7 mg, 84%); m.p. 120.5 – 121.8 °C; <sup>1</sup>H NMR (400 MHz, Chloroform-*d*) δ 7.11 (dd, *J* = 14.4, 8.3 Hz, 3H), 7.04 (s, 1H), 6.95 (d, *J* = 8.4 Hz, 1H), 6.54 (d, *J* = 8.3 Hz, 2H), 5.40 (s, 1H), 4.95 (d, *J* = 4.7 Hz, 1H), 4.63 (d, *J* = 4.7 Hz, 1H), 3.93 (d, *J* = 3.7 Hz, 2H), 2.36 (s, 3H), 2.28 (s, 3H). <sup>13</sup>C NMR (101 MHz, Chloroform-*d*) δ 149.0, 143.1, 135.8, 130.3, 129.9, 128.7, 126.7, 120.5, 118.7, 113.4, 66.4, 61.9, 55.0, 20.9, 20.4. HRMS (ESI-TOF) *m/z*: [M + H]<sup>+</sup> Calcd for C<sub>17</sub>H<sub>19</sub>N<sub>2</sub>O<sub>3</sub>S, 331.1111; Found: 331.1120.

*2-(4-methoxyphenyl)-9-methyl-1,2,3,10b-tetrahydrobenzo[e]imidazo[1,5-c][1,2,3]oxathiazine 5,5-dioxide (3x)*

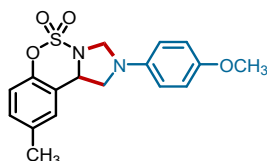

Purification by flash column chromatography (PE:EA, 100:1~15:1 v/v) to provide **3x**. White solid (28.3 mg, 82%); m.p. 148.9 – 150.3 °C; <sup>1</sup>H NMR (400 MHz, Chloroform-*d*) δ 7.13 (d, *J* = 8.4 Hz, 1H), 7.03 (s, 1H), 6.95 (d, *J* = 8.4 Hz, 1H), 6.89 – 6.84 (m, 2H), 6.64 – 6.58 (m, 2H), 5.38 (t, *J* = 4.0 Hz, 1H), 4.95 (d, *J* = 4.9 Hz, 1H), 4.59 (d, *J* = 4.9 Hz, 1H), 3.92 – 3.86 (m, 2H), 3.78 (s, 3H), 2.36 (s, 3H). <sup>13</sup>C NMR (101 MHz, Chloroform-*d*) δ 153.5, 149.0, 139.7, 135.8, 130.2, 126.6, 120.7, 118.7, 114.98, 114.96, 67.1, 61.9, 55.8, 55.7, 20.9. HRMS (ESI-TOF) *m/z*: [M + H]<sup>+</sup> Calcd for C<sub>17</sub>H<sub>19</sub>N<sub>2</sub>O<sub>4</sub>S, 347.1060; Found: 347.1068.

*2-(4-fluorophenyl)-9-methyl-1,2,3,10b-tetrahydrobenzo[e]imidazo[1,5-c][1,2,3]oxathiazine 5,5-dioxide (3y)*

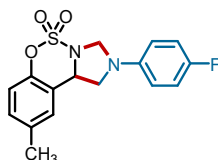

Purification by flash column chromatography (PE:EA, 100:1~15:1 v/v) to provide **3y**. White solid (24.7 mg, 74%); m.p. 168.6 – 170.5 °C; <sup>1</sup>H NMR (400 MHz, Chloroform-*d*) δ 7.14 (d, *J* = 8.4 Hz, 1H), 7.04 – 6.95 (m, 4H), 6.59 – 6.53 (m, 2H), 5.44 – 5.39 (m, 1H), 4.94 (d, *J* = 4.7 Hz, 1H), 4.61 (d, *J* = 4.7 Hz, 1H), 3.95 – 3.89 (m, 2H), 2.37 (s, 3H). <sup>13</sup>C NMR (101 MHz, Chloroform-*d*) δ 156.8 (d, *J* = 238.4 Hz),

148.9, 141.8 (d,  $J = 2.2$  Hz), 136.0, 130.4, 126.7, 120.4, 118.7, 116.0 (d,  $J = 22.6$  Hz), 114.4 (d,  $J = 7.7$  Hz), 66.6, 61.9, 55.3, 20.9.  $^{19}\text{F}$  NMR (376 MHz, Chloroform- $d$ )  $\delta$  -125.21. HRMS (ESI-TOF)  $m/z$ :  $[\text{M} + \text{H}]^+$  Calcd for  $\text{C}_{16}\text{H}_{16}\text{FN}_2\text{O}_3\text{S}$ , 335.0860; Found: 335.0869.

*2-(4-chlorophenyl)-9-methyl-1,2,3,10b-tetrahydrobenzo[e]imidazo[1,5-c][1,2,3]oxathiazine 5,5-dioxide (3z)*

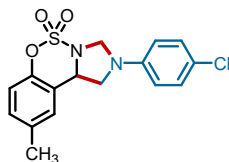

Purification by flash column chromatography (PE:EA, 100:1~15:1 v/v) to provide **3z**. White solid (26.6 mg, 76%); m.p. 187.8 – 189.2 °C;  $^1\text{H}$  NMR (400 MHz, Chloroform- $d$ )  $\delta$  7.26 – 7.21 (m, 2H), 7.17 – 7.13 (m, 1H), 7.06 – 7.03 (m, 1H), 6.96 (d,  $J = 8.4$  Hz, 1H), 6.55 – 6.50 (m, 2H), 5.43 (d,  $J = 5.4$  Hz, 1H), 4.91 (d,  $J = 4.7$  Hz, 1H), 4.65 (d,  $J = 4.7$  Hz, 1H), 3.98 – 3.91 (m, 2H), 2.37 (s, 3H).  $^{13}\text{C}$  NMR (101 MHz, Chloroform- $d$ )  $\delta$  148.9, 143.7, 136.0, 130.5, 129.3, 126.7, 124.3, 120.1, 118.7, 114.3, 66.0, 61.9, 54.6, 20.9. HRMS (ESI-TOF)  $m/z$ :  $[\text{M} + \text{H}]^+$  Calcd for  $\text{C}_{16}\text{H}_{16}\text{ClN}_2\text{O}_3\text{S}$ , 351.0565; Found: 351.0566.

*2-(4-bromophenyl)-9-methyl-1,2,3,10b-tetrahydrobenzo[e]imidazo[1,5-c][1,2,3]oxathiazine 5,5-dioxide (3aa)*

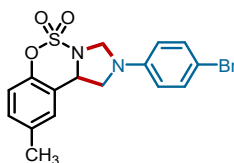

Purification by flash column chromatography (PE:EA, 100:1~15:1 v/v) to provide **3aa**. Yellow solid (24.8 mg, 63%); m.p. 112.1 – 113.3 °C;  $^1\text{H}$  NMR (400 MHz, Chloroform- $d$ )  $\delta$  7.40 – 7.34 (m, 2H), 7.17 – 7.13 (m, 1H), 7.04 (s, 1H), 6.96 (d,  $J = 8.4$  Hz, 1H), 6.50 – 6.45 (m, 2H), 5.43 (d,  $J = 5.4$  Hz, 1H), 4.90 (d,  $J = 4.7$  Hz, 1H), 4.64 (d,  $J = 4.7$  Hz, 1H), 3.98 – 3.90 (m, 2H), 2.37 (s, 3H).  $^{13}\text{C}$  NMR (101 MHz, Chloroform- $d$ )  $\delta$  148.9, 144.0, 136.0, 132.2, 130.5, 126.7, 120.0, 118.7, 114.7, 111.4, 65.8, 61.8, 54.4, 20.9. HRMS (ESI-TOF)  $m/z$ :  $[\text{M} + \text{H}]^+$  Calcd for  $\text{C}_{16}\text{H}_{16}^{79}\text{BrN}_2\text{O}_3\text{S}$ , 395.0060; Found: 395.0065.

*9-methyl-2-(4-(trifluoromethyl)phenyl)-1,2,3,10b-tetrahydrobenzo[e]imidazo[1,5-c][1,2,3]oxathiazine 5,5-dioxide (3ab)*

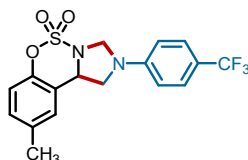

Purification by flash column chromatography (PE:EA, 100:1~15:1 v/v) to provide **3ab**. White solid (25.7 mg, 67%); m.p. 213.7 – 215.3 °C;  $^1\text{H}$  NMR (400 MHz, Chloroform- $d$ )  $\delta$  7.52 (d,  $J = 8.5$  Hz, 2H), 7.16 (d,  $J = 8.0$  Hz, 1H), 7.06 (s, 1H), 6.97 (d,  $J = 8.4$  Hz, 1H), 6.61 (d,  $J = 8.5$  Hz, 2H), 5.48 (d,  $J = 5.7$  Hz, 1H), 4.92 (d,  $J = 4.7$  Hz, 1H), 4.75 (d,  $J = 4.7$  Hz, 1H), 4.11 – 3.99 (m, 2H), 2.37 (s, 3H).  $^{13}\text{C}$  NMR (101 MHz, Chloroform- $d$ )  $\delta$  148.8, 147.1, 136.2, 130.7, 126.8 (q,  $J = 4.2$  Hz), 124.6 (q,  $J = 271.7$  Hz), 120.7 (q,  $J = 32.9$  Hz), 119.7, 118.8, 114.2, 112.3, 65.2, 61.8, 53.9, 20.9.  $^{19}\text{F}$  NMR (376 MHz,

Chloroform-*d*  $\delta$  -61.36. HRMS (ESI-TOF) *m/z*: [M + H]<sup>+</sup> Calcd for C<sub>17</sub>H<sub>15</sub>F<sub>3</sub>N<sub>2</sub>O<sub>3</sub>S, 385.0828; Found: 385.0835.

2-(3-chlorophenyl)-9-methyl-1,2,3,10b-tetrahydrobenzo[e]imidazo[1,5-c][1,2,3]oxathiazine 5,5-dioxide (**3ac**)

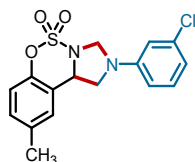

Purification by flash column chromatography (PE:EA, 100:1~15:1 v/v) to provide **3ac**. White solid (13.0 mg, 37%); m.p. 167.4 – 168.9 °C; <sup>1</sup>H NMR (400 MHz, Chloroform-*d*)  $\delta$  7.22 – 7.13 (m, 2H), 7.06 – 7.02 (m, 1H), 6.96 (d, *J* = 8.4 Hz, 1H), 6.88 – 6.80 (m, 1H), 6.59 (t, *J* = 2.1 Hz, 1H), 6.47 – 6.44 (m, 1H), 5.44 (d, *J* = 5.7 Hz, 1H), 4.90 (d, *J* = 4.7 Hz, 1H), 4.68 (d, *J* = 4.7 Hz, 1H), 4.02 – 3.92 (m, 2H), 2.37 (s, 3H). <sup>13</sup>C NMR (101 MHz, Chloroform-*d*)  $\delta$  148.8, 145.9, 136.0, 135.3, 130.6, 130.5, 126.7, 119.9, 119.0, 118.7, 113.1, 111.2, 65.6, 61.8, 54.2, 20.9. HRMS (ESI-TOF) *m/z*: [M + H]<sup>+</sup> Calcd for C<sub>16</sub>H<sub>16</sub>ClN<sub>2</sub>O<sub>3</sub>S, 351.0565; Found: 351.0574.

9-methyl-2-(*o*-tolyl)-1,2,3,10b-tetrahydrobenzo[e]imidazo[1,5-c][1,2,3]oxathiazine 5,5-dioxide (**3ad**)

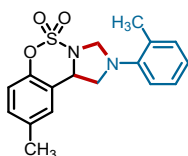

Purification by flash column chromatography (PE:EA, 100:1~15:1 v/v) to provide **3ad**. White solid (9.2 mg, 28%); m.p. 98.1 – 99.9 °C; <sup>1</sup>H NMR (400 MHz, Chloroform-*d*)  $\delta$  7.19 (t, *J* = 7.4 Hz, 2H), 7.14 – 7.04 (m, 3H), 6.99 (d, *J* = 8.4 Hz, 1H), 6.91 (d, *J* = 1.5 Hz, 1H), 5.20 – 5.15 (m, 1H), 4.84 (d, *J* = 7.3 Hz, 1H), 4.61 (d, *J* = 7.3 Hz, 1H), 3.98 – 3.91 (m, 1H), 3.58 (dd, *J* = 10.8, 4.6 Hz, 1H), 2.34 (s, 3H), 2.26 (s, 3H). <sup>13</sup>C NMR (101 MHz, Chloroform-*d*)  $\delta$  148.6, 145.8, 135.8, 132.3, 131.5, 129.8, 126.9, 126.7, 124.5, 121.9, 118.81, 118.80, 70.3, 60.7, 60.3, 20.8, 18.4. HRMS (ESI-TOF) *m/z*: [M + H]<sup>+</sup> Calcd for C<sub>17</sub>H<sub>19</sub>N<sub>2</sub>O<sub>3</sub>S, 331.1111; Found: 331.1124.

2-phenyl-1,2,3,9b-tetrahydrobenzo[d]imidazo[1,5-b]isothiazole 5,5-dioxide (**3ae**)

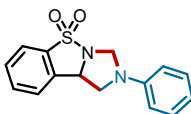

Purification by flash column chromatography (PE:EA, 100:1~10:1 v/v) to provide **3ae**. Yellow solid (23.5 mg, 82%); m.p. 112.3 – 113.4 °C; <sup>1</sup>H NMR (400 MHz, Chloroform-*d*)  $\delta$  7.83 (d, *J* = 7.8 Hz, 1H), 7.70 (t, *J* = 7.5 Hz, 1H), 7.59 (t, *J* = 7.5 Hz, 1H), 7.50 (d, *J* = 7.7 Hz, 1H), 7.30 – 7.26 (m, 2H), 6.88 (t, *J* = 7.3 Hz, 1H), 6.70 (d, *J* = 8.3 Hz, 2H), 5.39 – 5.29 (m, 2H), 4.43 (d, *J* = 7.5 Hz, 1H), 3.80 – 3.74 (m, 2H). <sup>13</sup>C NMR (101 MHz, Chloroform-*d*)  $\delta$  145.4, 138.5, 135.5, 133.7, 130.0, 129.4, 124.0, 121.7, 119.7, 114.4, 65.1, 63.2, 53.0. HRMS (ESI-TOF) *m/z*: [M + H]<sup>+</sup> Calcd for C<sub>15</sub>H<sub>15</sub>N<sub>2</sub>O<sub>2</sub>S, 287.0849; Found: 287.0858.

2-phenyl-1,2,3,3a-tetrahydro-4H-benzo[b]imidazo[1,5-d][1,4]oxazin-4-one (**3af**)



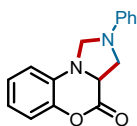

Purification by flash column chromatography (PE:EA, 100:1~15:1 v/v) to provide **3af**. Yellow solid (11.2 mg, 42%); m.p. 114.3 – 116.0 °C; <sup>1</sup>H NMR (400 MHz, Chloroform-*d*) δ 7.34 (t, *J* = 8.0 Hz, 2H), 7.19 – 7.15 (m, 2H), 6.99 (td, *J* = 7.9, 1.2 Hz, 1H), 6.87 (t, *J* = 7.3 Hz, 1H), 6.80 – 6.78 (m, 1H), 6.66 (d, *J* = 8.1 Hz, 2H), 4.80 (d, *J* = 3.4 Hz, 1H), 4.69 (d, *J* = 3.3 Hz, 1H), 4.10 (dd, *J* = 8.5, 7.0 Hz, 1H), 3.96 (dd, *J* = 8.5, 7.0 Hz, 1H), 3.84 (t, *J* = 8.6 Hz, 1H). <sup>13</sup>C NMR (101 MHz, Chloroform-*d*) δ 164.1, 145.4, 142.4, 132.2, 129.5, 125.4, 121.0, 118.1, 116.9, 113.4, 112.0, 64.9, 57.2, 47.9. HRMS (ESI-TOF) *m/z*: [M + H]<sup>+</sup> Calcd for C<sub>16</sub>H<sub>15</sub>N<sub>2</sub>O<sub>2</sub>, 267.1128; Found: 267.1137.

#### 4. NMR Copies of Products

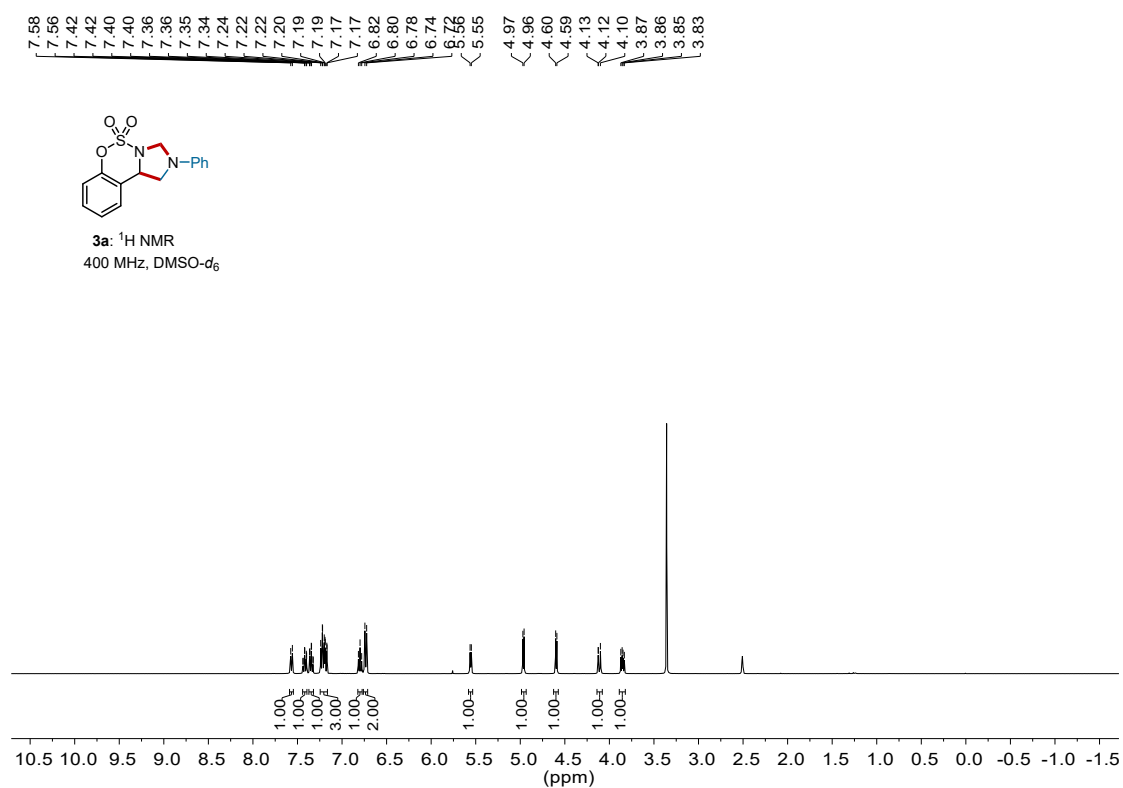

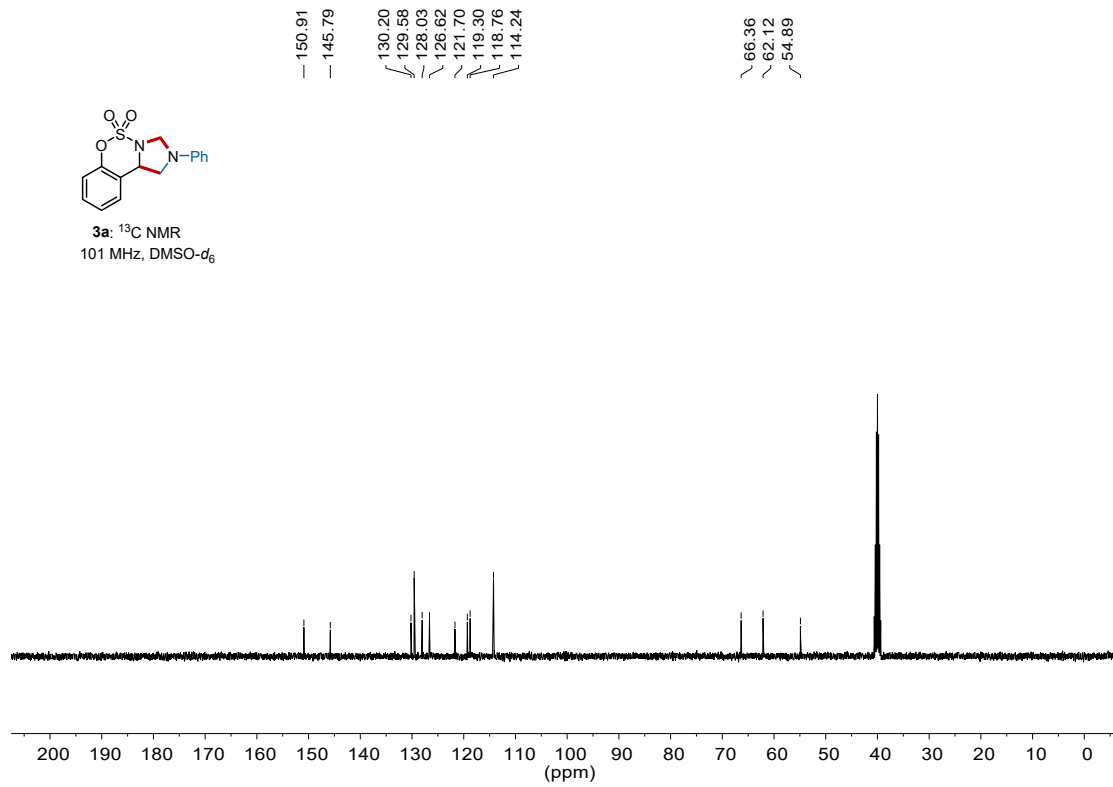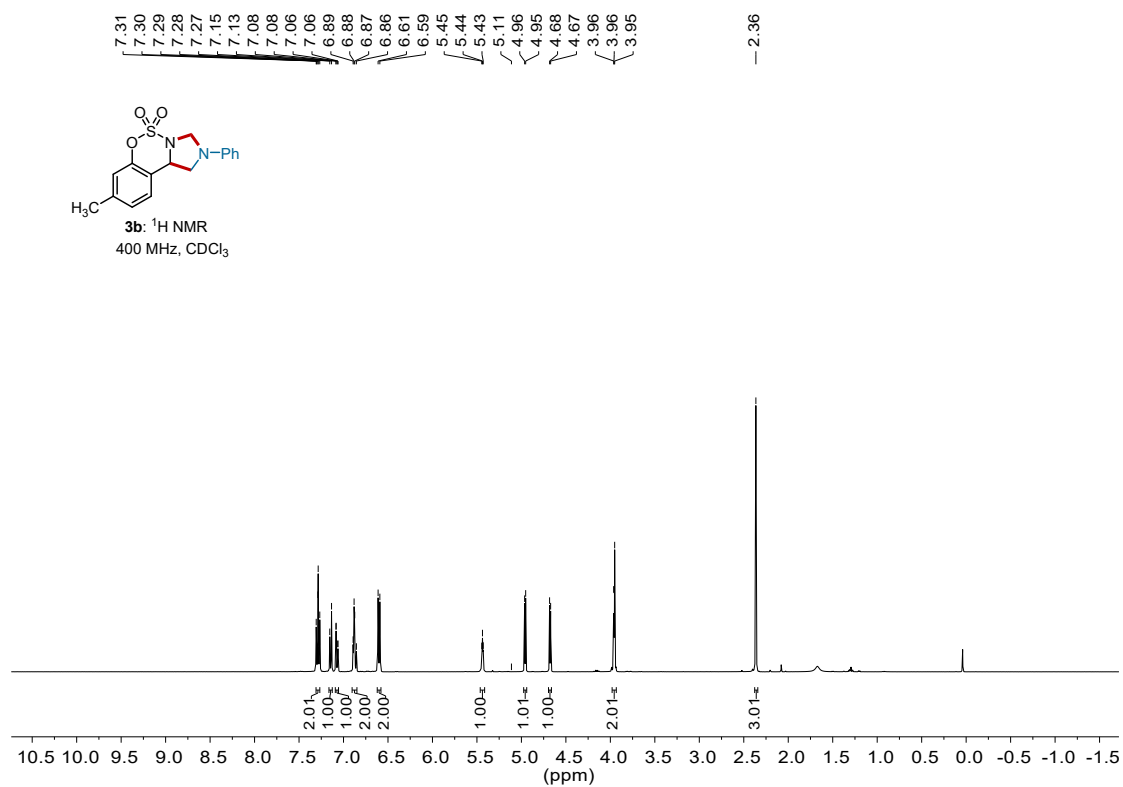

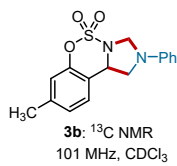

150.83  
 145.08  
 140.40  
 129.47  
 126.93  
 126.24  
 119.20  
 119.16  
 117.64  
 113.14  
 65.97  
 61.77  
 54.47  
 20.99

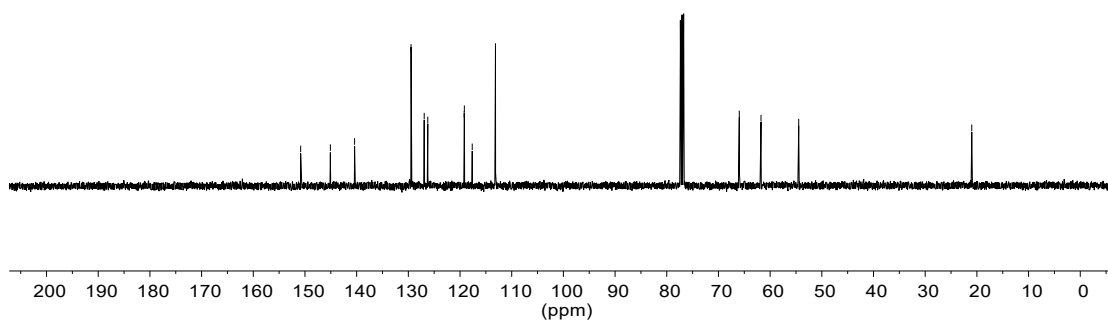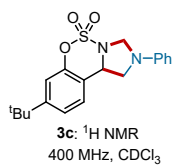

7.31  
 7.30  
 7.30  
 7.29  
 7.29  
 7.29  
 7.28  
 7.28  
 7.27  
 7.27  
 7.20  
 7.18  
 7.06  
 7.06  
 6.89  
 6.87  
 6.85  
 6.61  
 6.59  
 5.46  
 5.45  
 5.44  
 4.97  
 4.96  
 4.69  
 4.68  
 3.98  
 3.97  
 1.32

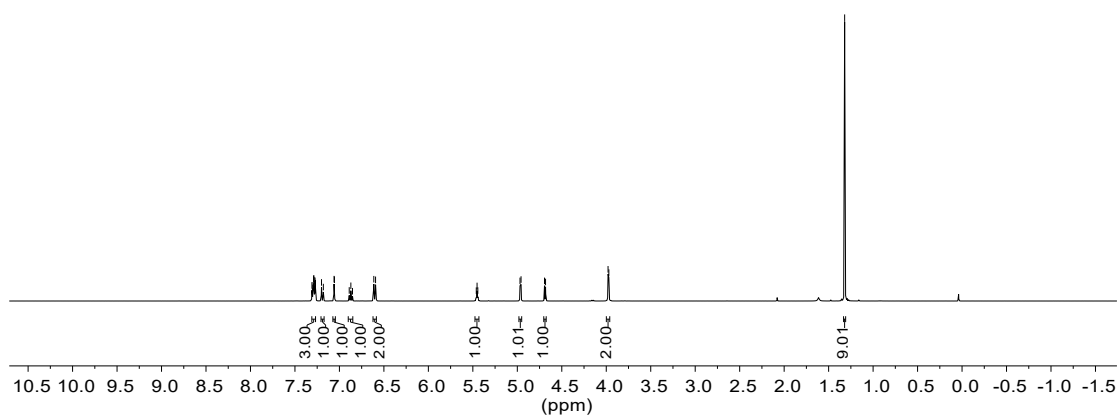

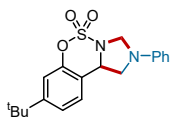

**3c:**  $^{13}\text{C}$  NMR  
101 MHz,  $\text{CDCl}_3$

153.85  
150.78  
145.04  
129.49  
126.07  
123.33  
119.14  
117.54  
115.84  
113.07

65.91  
61.73  
54.35

34.81  
31.03

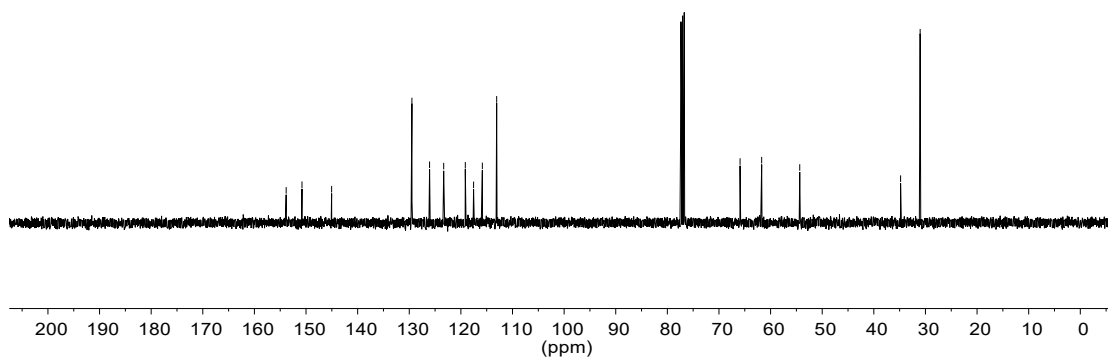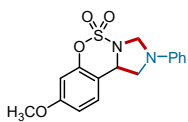

**3d:**  $^1\text{H}$  NMR  
400 MHz,  $\text{CDCl}_3$

7.30  
7.30  
7.28  
7.27  
7.26  
7.16  
7.13  
6.89  
6.87  
6.85  
6.83  
6.81  
6.80  
6.61  
6.61  
6.59  
6.58  
5.43  
5.42  
5.41  
5.41  
4.96  
4.95  
4.69  
4.67  
3.97  
3.96  
3.95  
3.94  
3.94  
3.92  
3.81

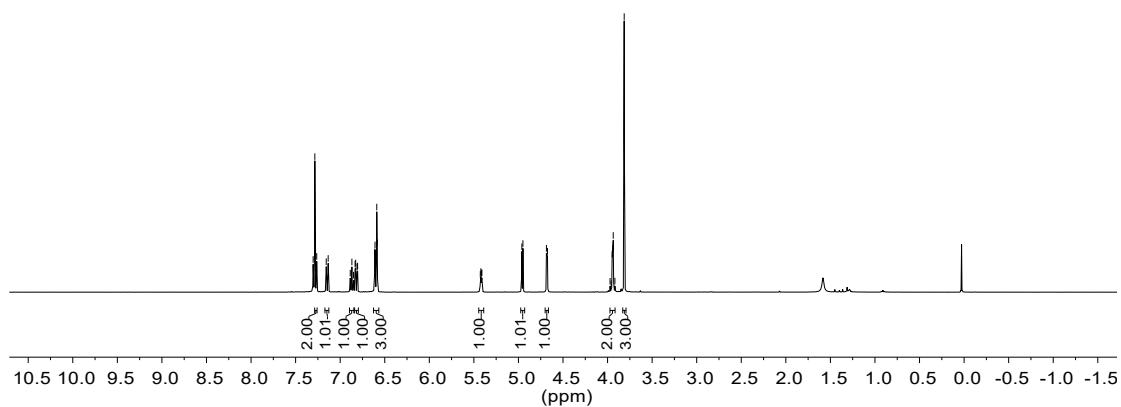

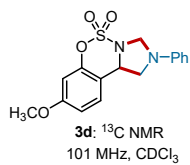

— 160.46  
 — 151.73  
 — 145.06  
 — 129.48  
 — 127.12  
 — 119.18  
 — 113.09  
 — 113.05  
 — 112.35  
 — 103.65  
 — 65.94  
 — 61.52  
 — 55.68  
 — 54.45

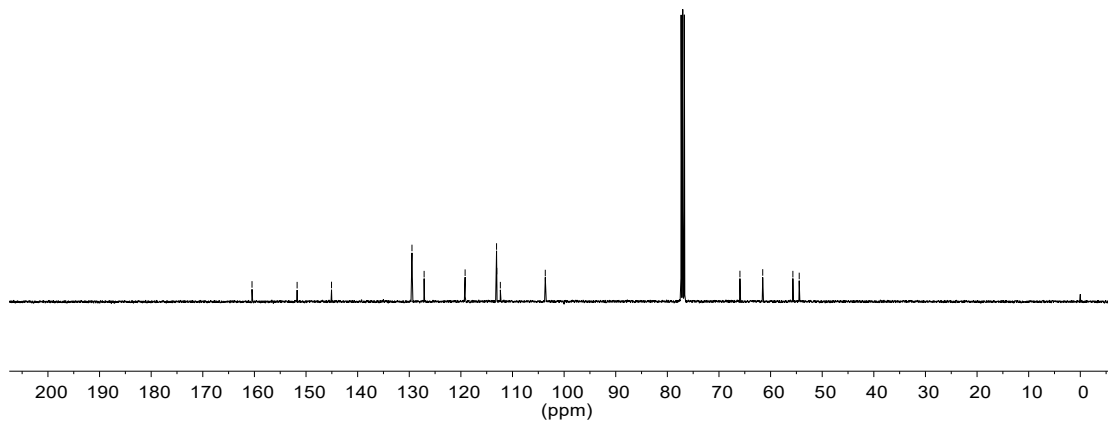

7.29  
 7.28  
 7.27  
 7.27  
 7.26  
 7.25  
 7.02  
 7.00  
 6.86  
 6.84  
 6.82  
 6.59  
 6.57  
 6.54  
 6.53  
 6.51  
 6.25  
 6.24  
 5.39  
 5.38  
 5.37  
 4.94  
 4.93  
 4.68  
 4.67  
 3.92  
 3.91  
 3.91  
 3.36  
 3.34  
 3.33  
 3.31  
 1.18  
 1.16  
 1.15

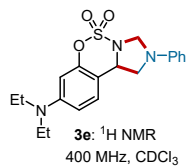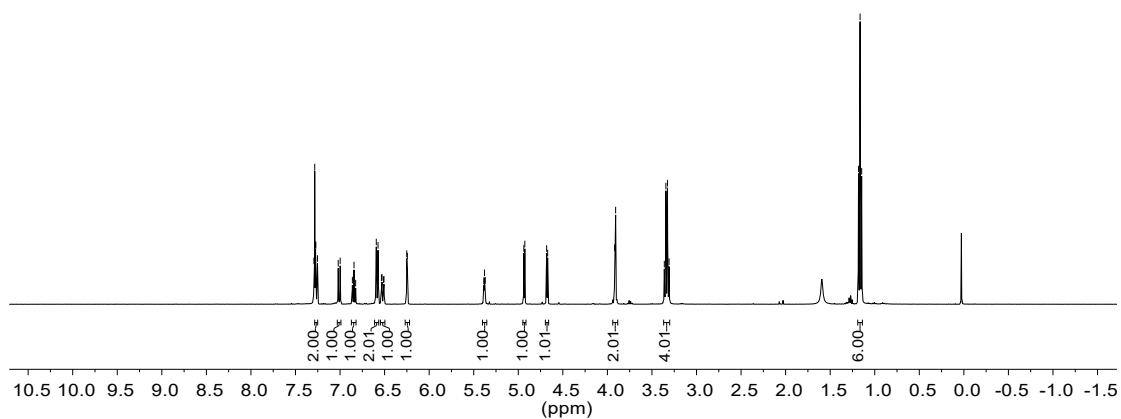

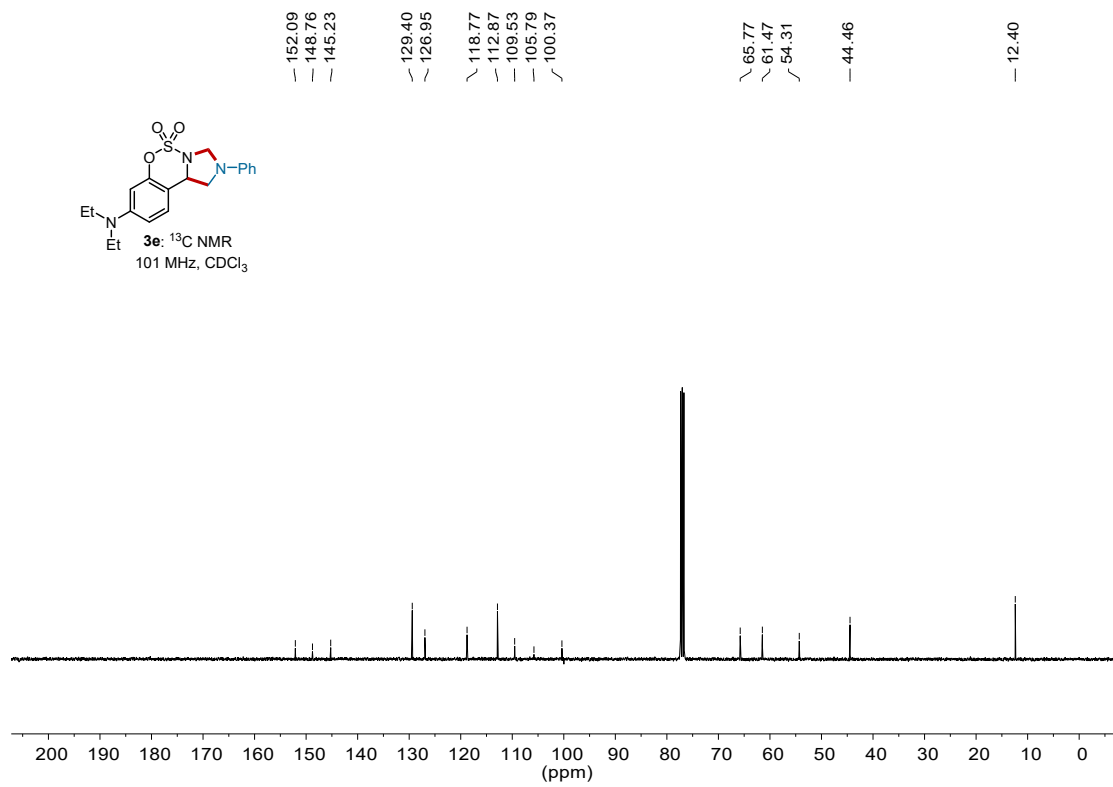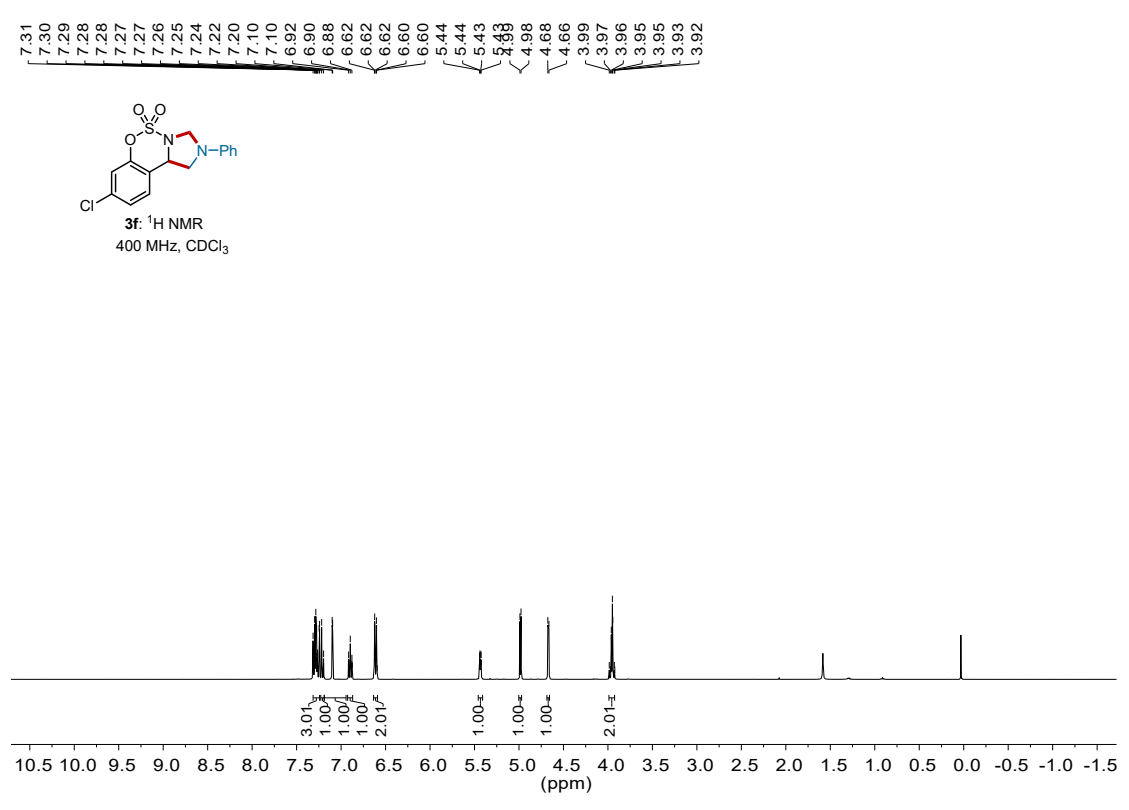

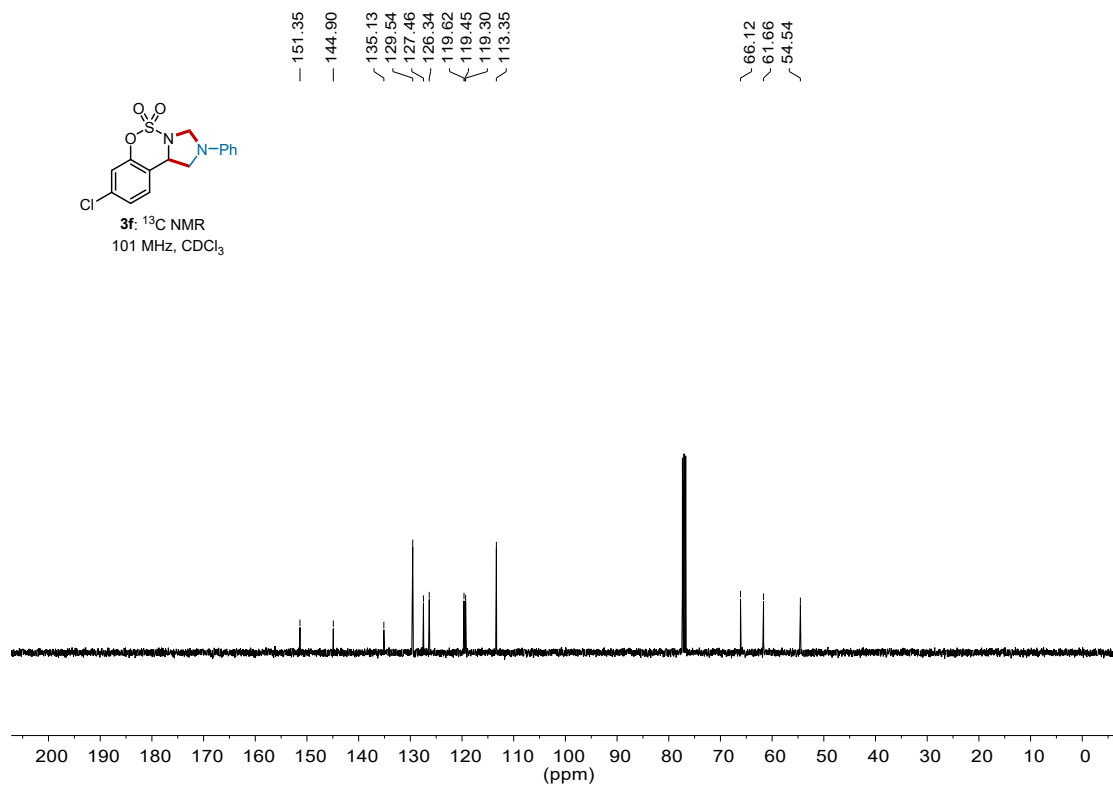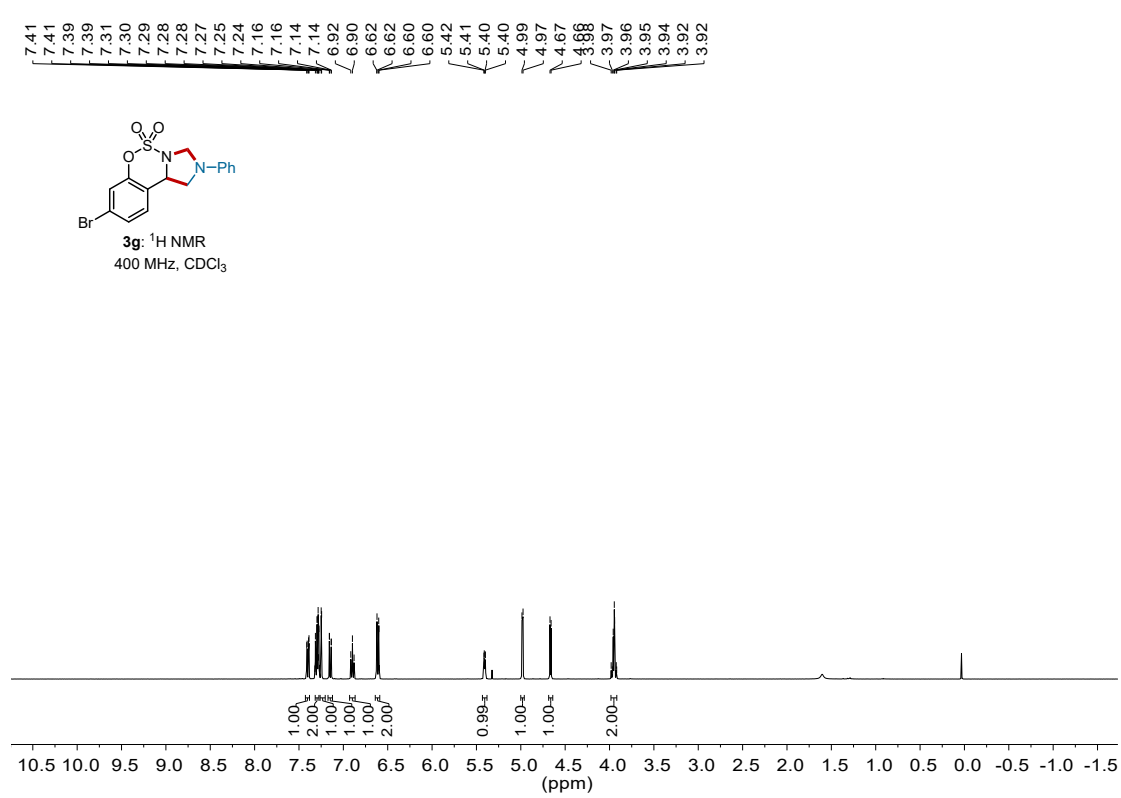

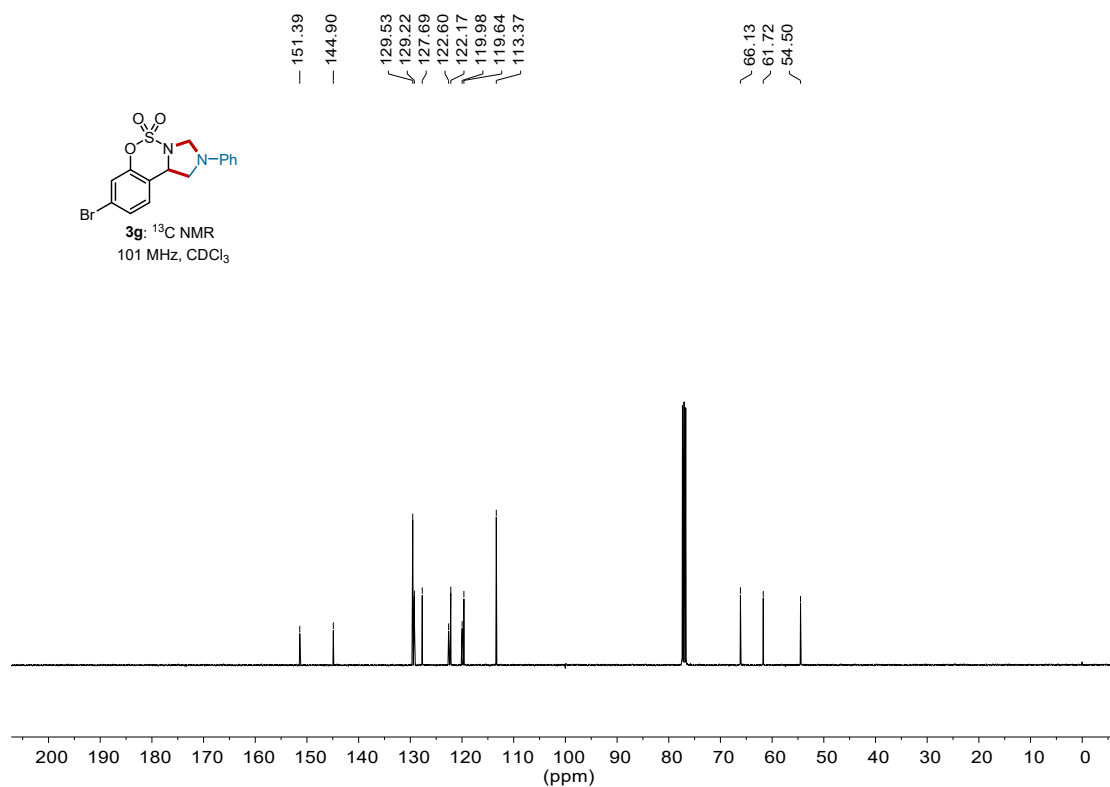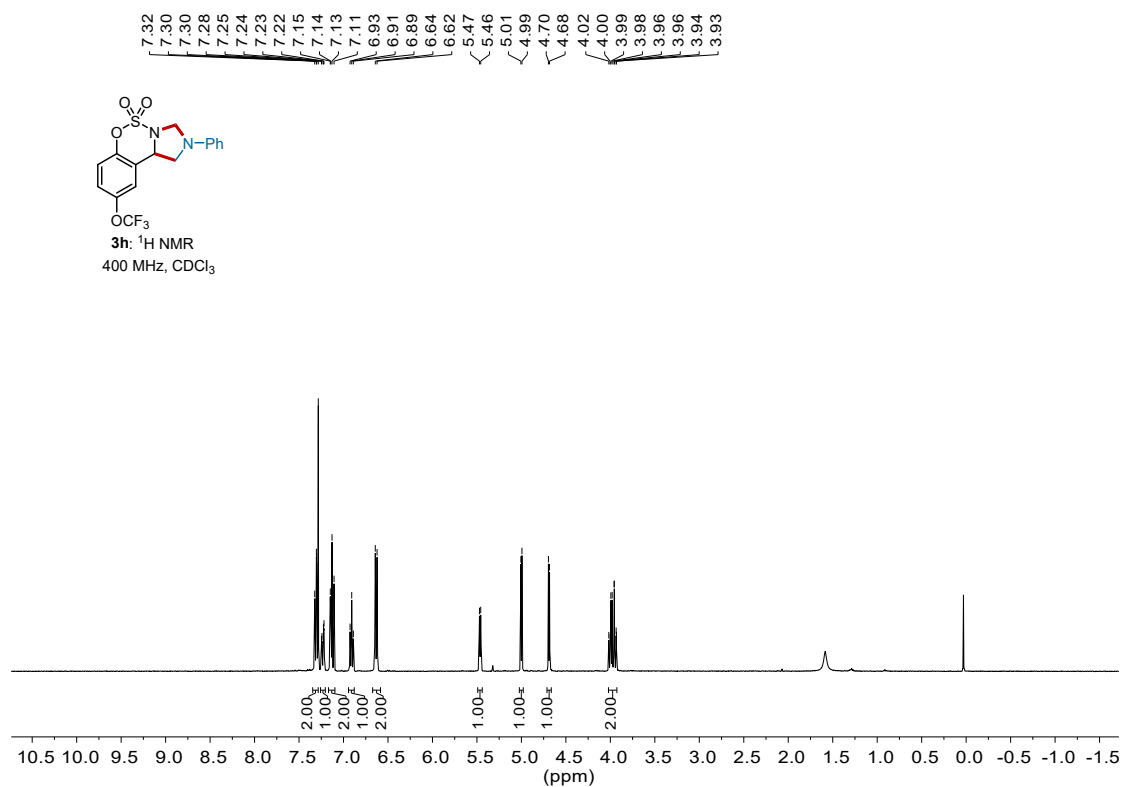



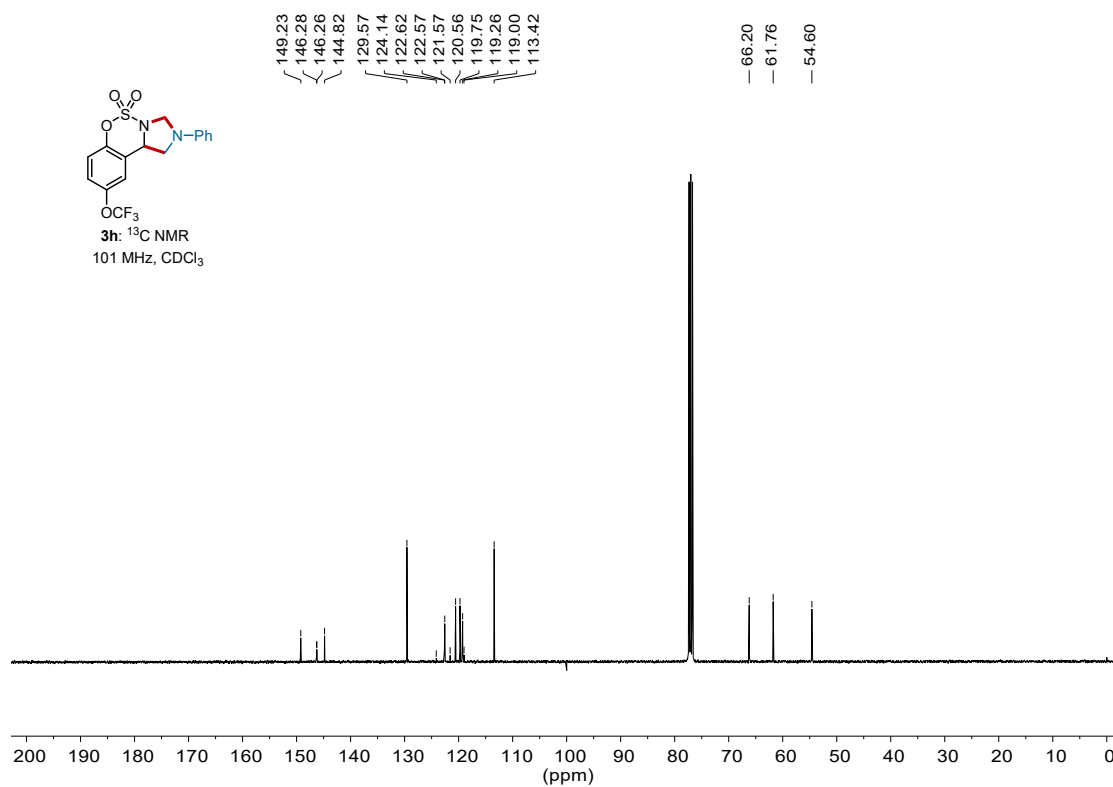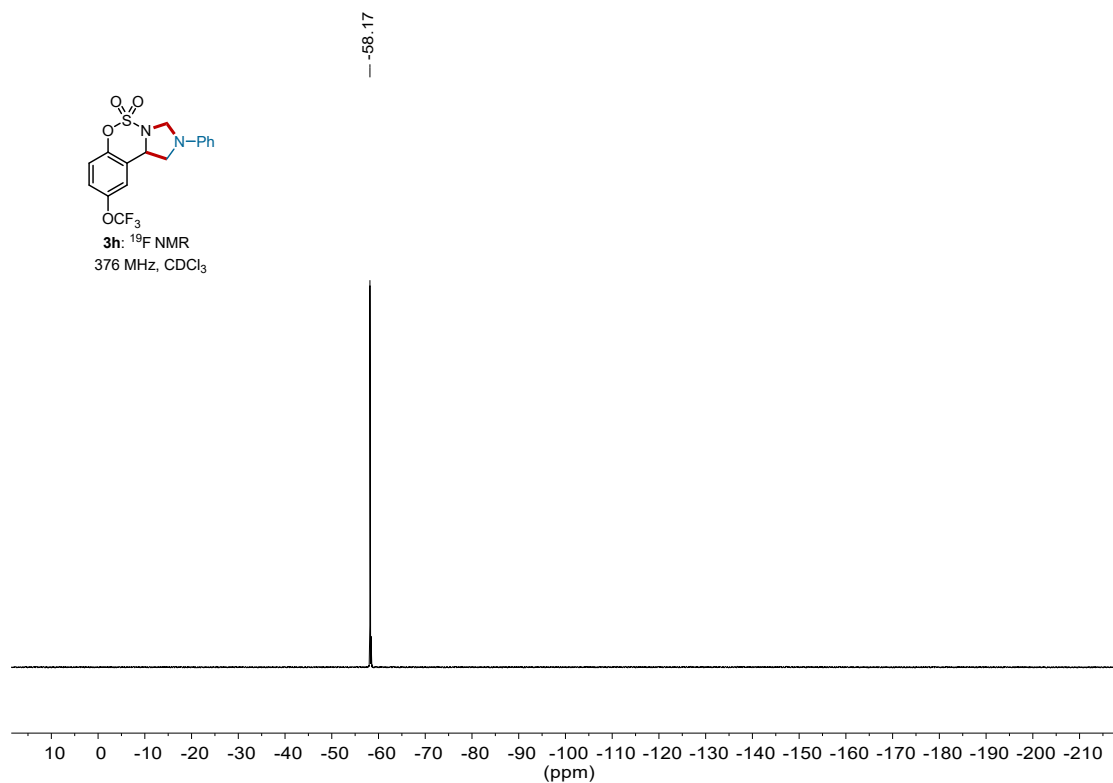

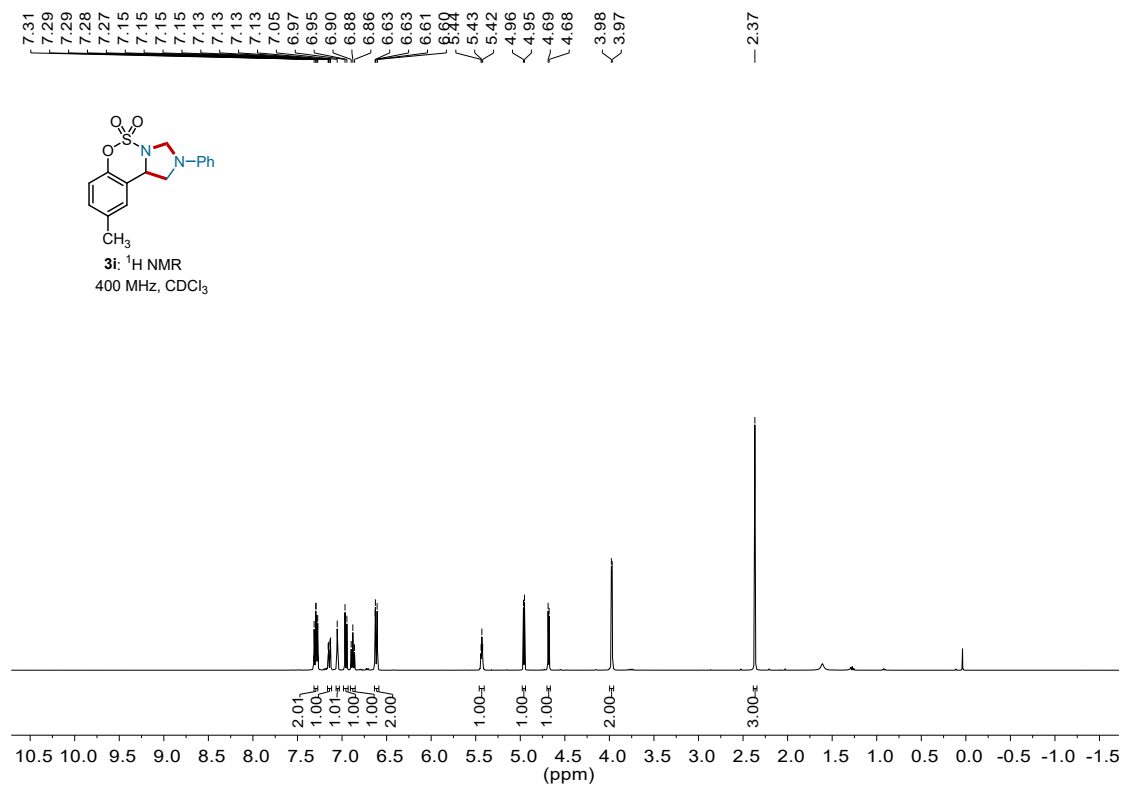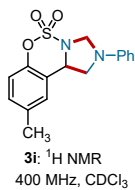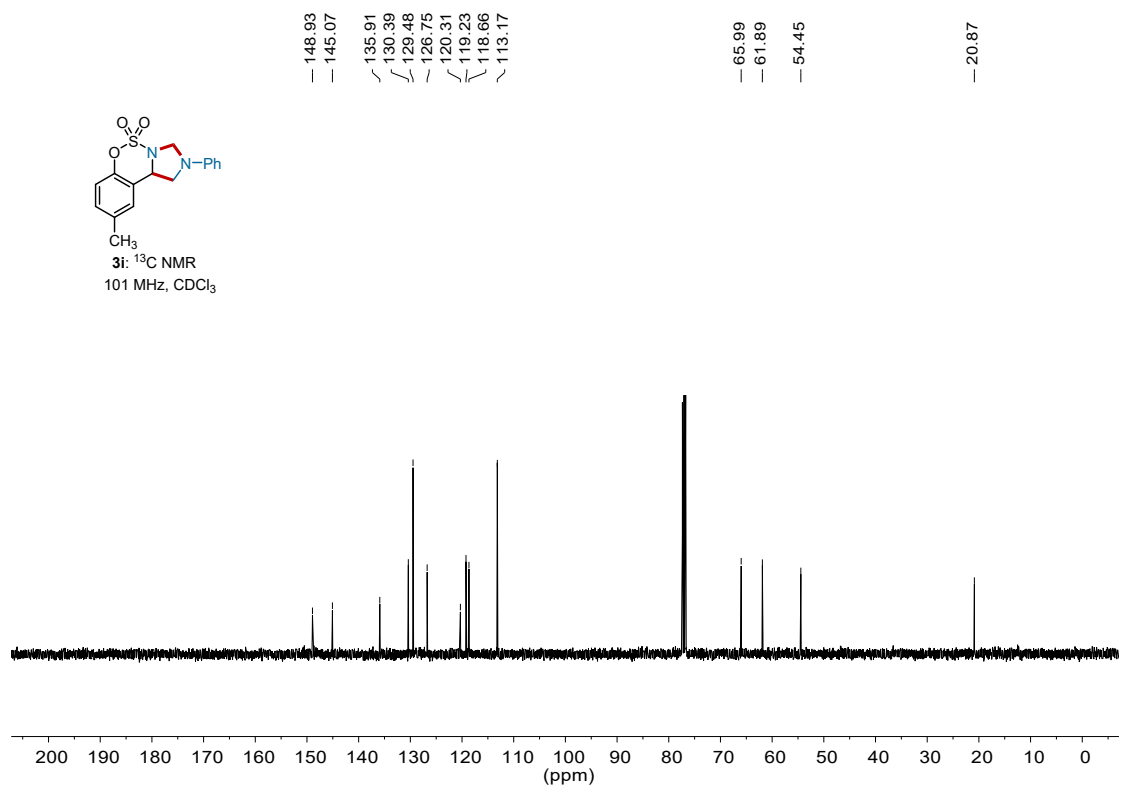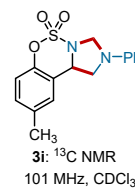

7.33  
7.32  
7.32  
7.30  
7.28  
7.28  
7.07  
7.06  
7.06  
7.00  
7.00  
6.98  
6.98  
6.92  
6.90  
6.88  
6.64  
6.64  
6.62  
5.44  
5.43  
4.99  
4.98  
4.68  
4.67  
4.00  
3.98  
3.97  
3.96  
3.95  
3.94  
3.93

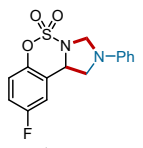

3j: <sup>1</sup>H NMR  
400 MHz, CDCl<sub>3</sub>

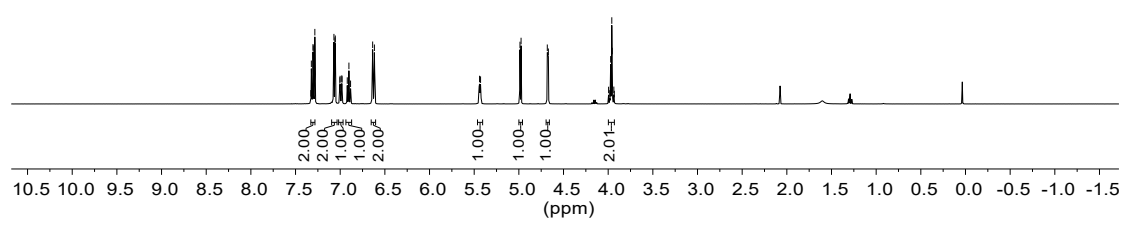

160.94  
158.49  
146.98  
146.95  
144.91  
129.55  
122.58  
122.51  
120.66  
120.56  
119.61  
116.76  
113.37  
113.28  
113.03  
66.14  
61.84  
61.82  
54.48

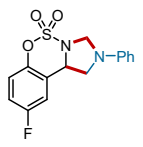

3j: <sup>13</sup>C NMR  
101 MHz, CDCl<sub>3</sub>

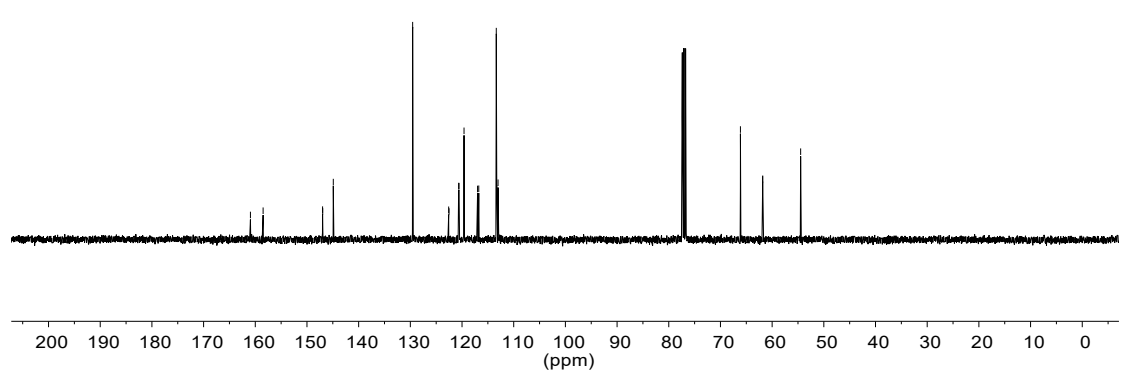

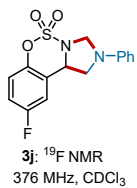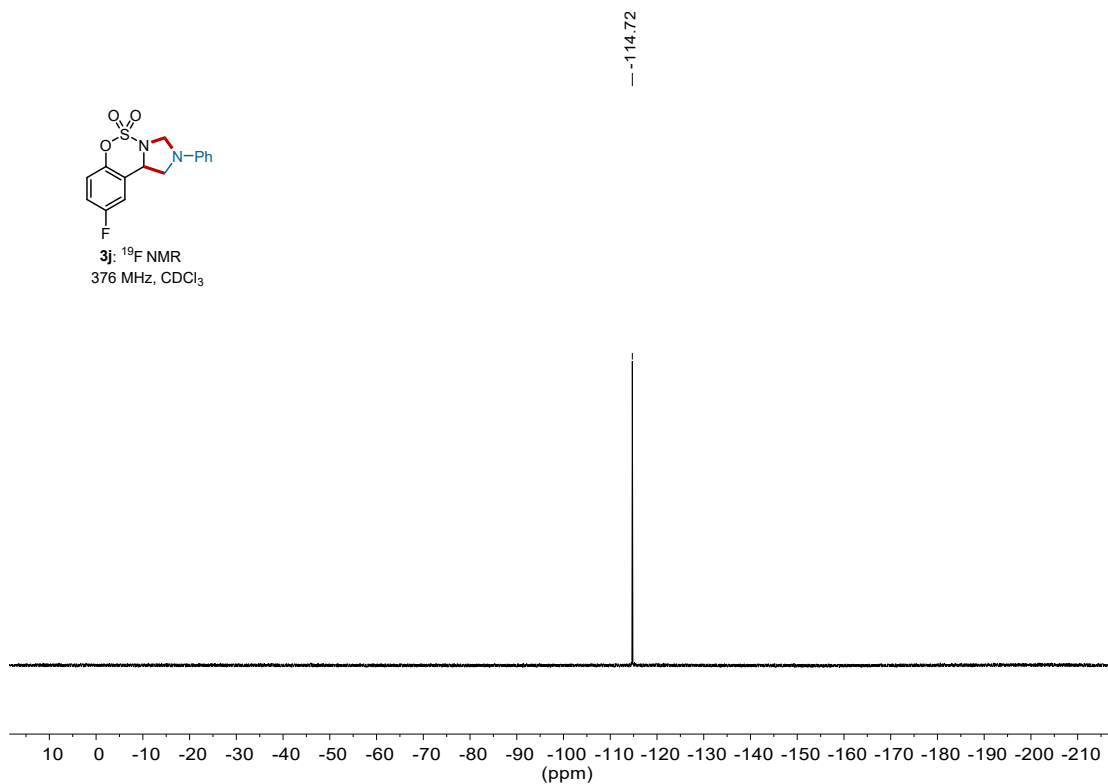

7.34  
 7.33  
 7.33  
 7.32  
 7.32  
 7.31  
 7.31  
 7.30  
 7.30  
 7.28  
 7.27  
 7.27  
 7.27  
 7.26  
 7.04  
 7.01  
 6.92  
 6.90  
 6.64  
 6.64  
 6.62  
 5.43  
 5.42  
 4.99  
 4.98  
 4.67  
 3.97  
 3.96  
 3.95

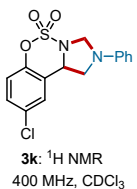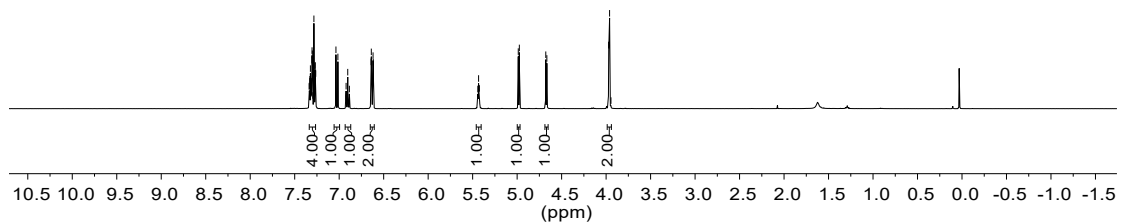

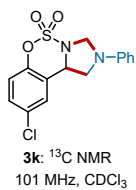

— 149.60  
 — 144.86  
 { 131.27  
 { 129.89  
 { 129.55  
 { 126.46  
 { 122.53  
 { 120.42  
 { 119.66  
 { 113.39  
 { 66.12  
 { 61.70  
 { 54.49

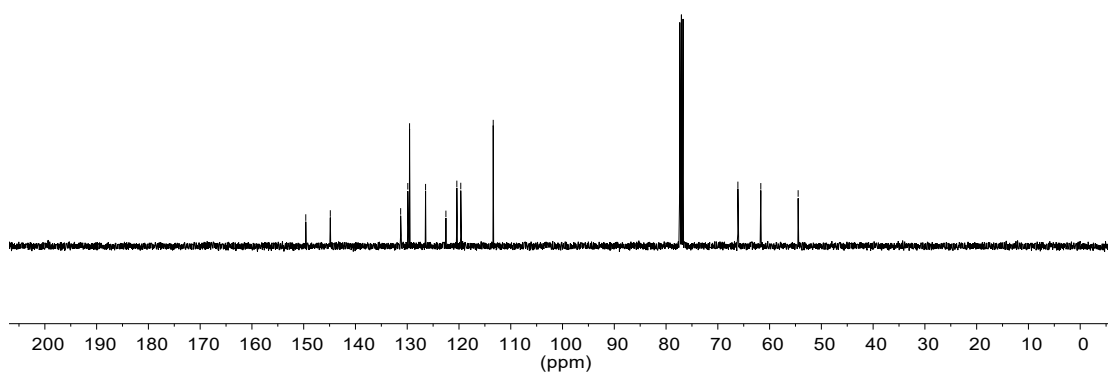

7.48  
 7.47  
 7.47  
 7.46  
 7.46  
 7.45  
 7.45  
 7.42  
 7.42  
 7.41  
 7.41  
 7.33  
 7.31  
 7.30  
 7.28  
 6.98  
 6.95  
 6.91  
 6.64  
 6.64  
 6.62  
 6.62  
 5.44  
 5.43  
 4.99  
 4.97  
 4.68  
 4.66  
 3.97  
 3.96

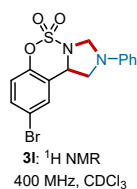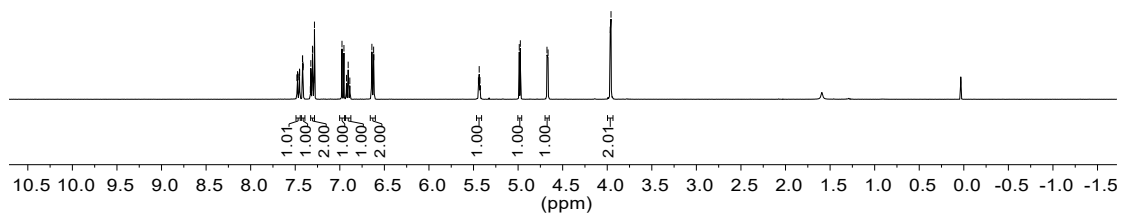

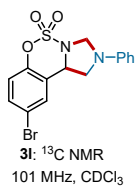

— 150.17  
 — 144.86  
 / 132.81  
 / 129.55  
 / 129.40  
 / 122.94  
 / 120.71  
 / 119.67  
 / 118.67  
 / 113.40

/ 66.13  
 / 61.60  
 / 54.51

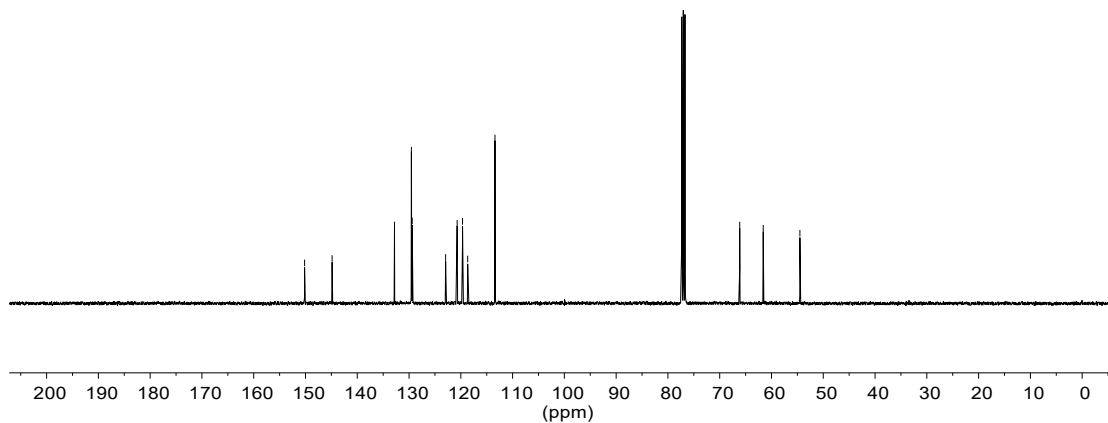

7.66  
 7.66  
 7.65  
 7.64  
 7.64  
 7.63  
 7.63  
 7.59  
 7.59  
 7.59  
 7.32  
 7.31  
 7.30  
 7.28  
 6.91  
 6.84  
 6.82  
 6.64  
 6.64  
 6.62  
 5.93  
 5.42  
 4.98  
 4.97  
 4.67  
 4.66  
 3.96  
 3.96  
 3.95  
 3.93

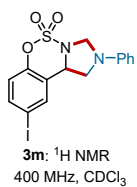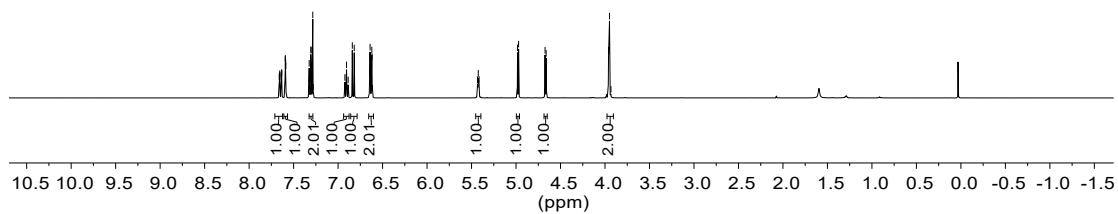

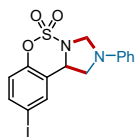

**3m:**  $^{13}\text{C}$  NMR  
101 MHz,  $\text{CDCl}_3$

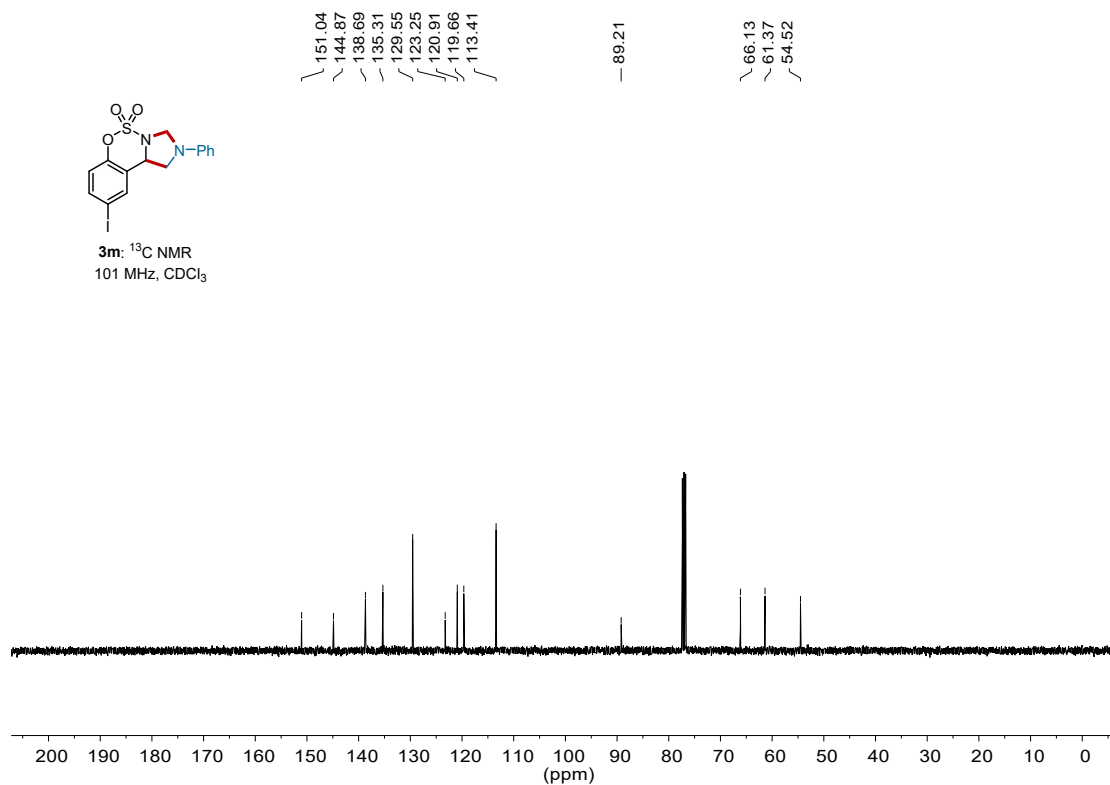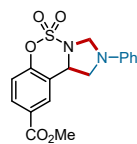

**3n:**  $^1\text{H}$  NMR  
400 MHz,  $\text{CDCl}_3$

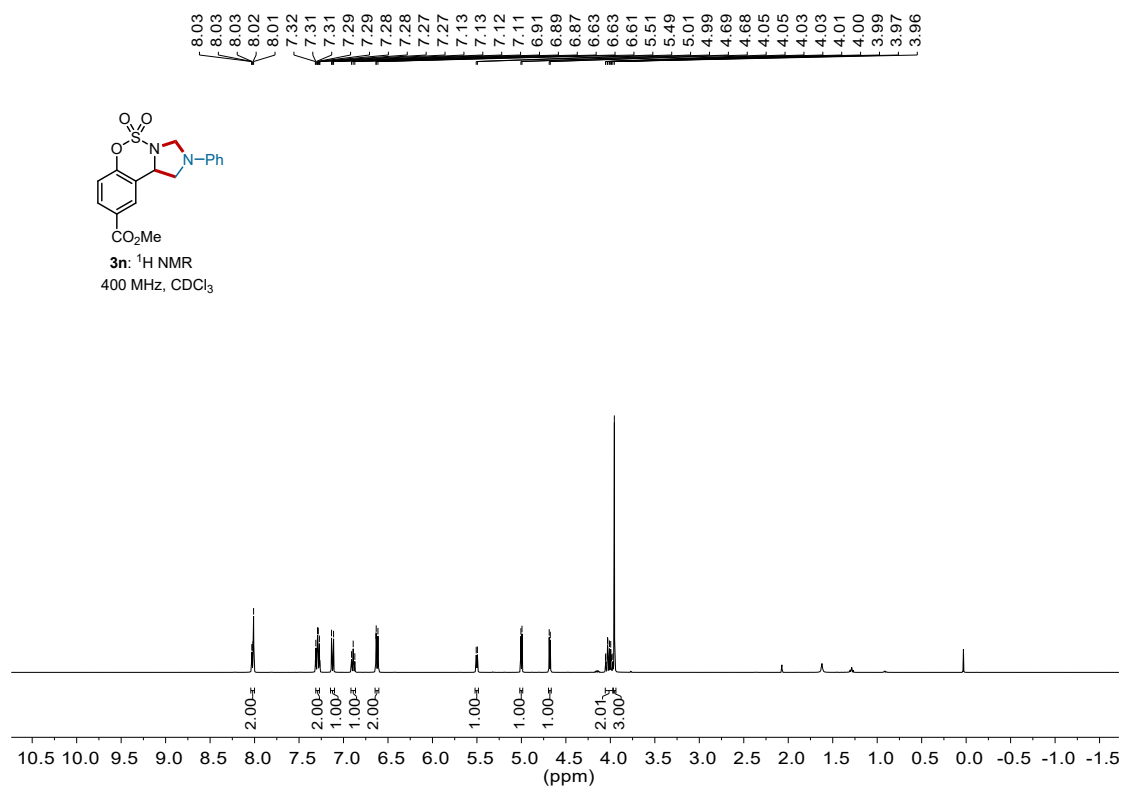

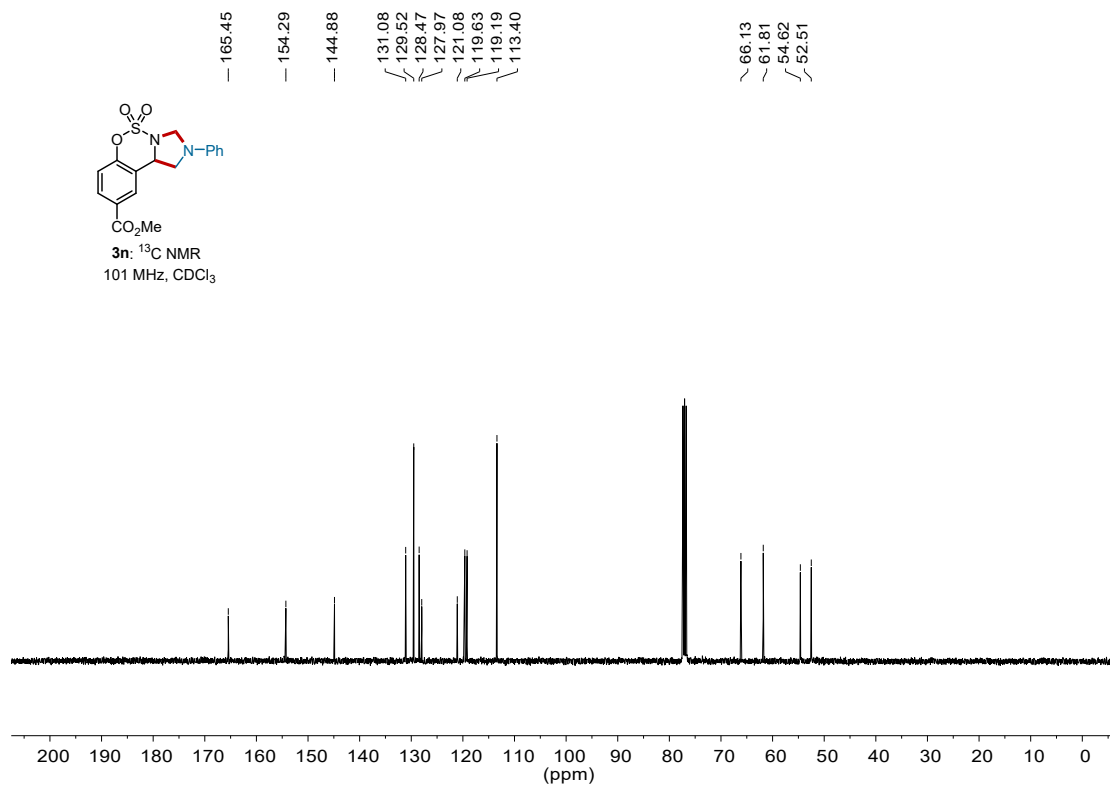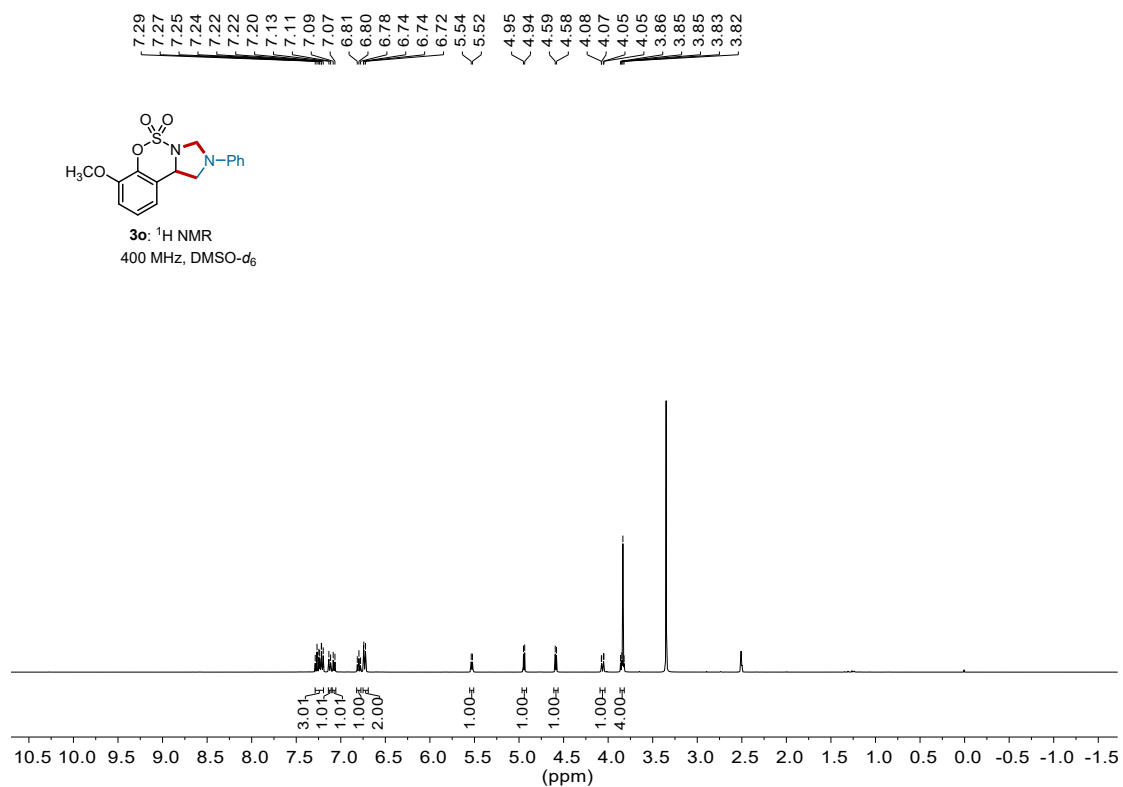



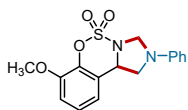

**3o:** <sup>13</sup>C NMR  
101 MHz, DMSO-*d*<sub>6</sub>

148.36  
145.80  
140.13  
129.58  
126.26  
122.51  
119.31  
118.60  
114.26  
112.76

66.41  
62.21  
56.50  
54.89

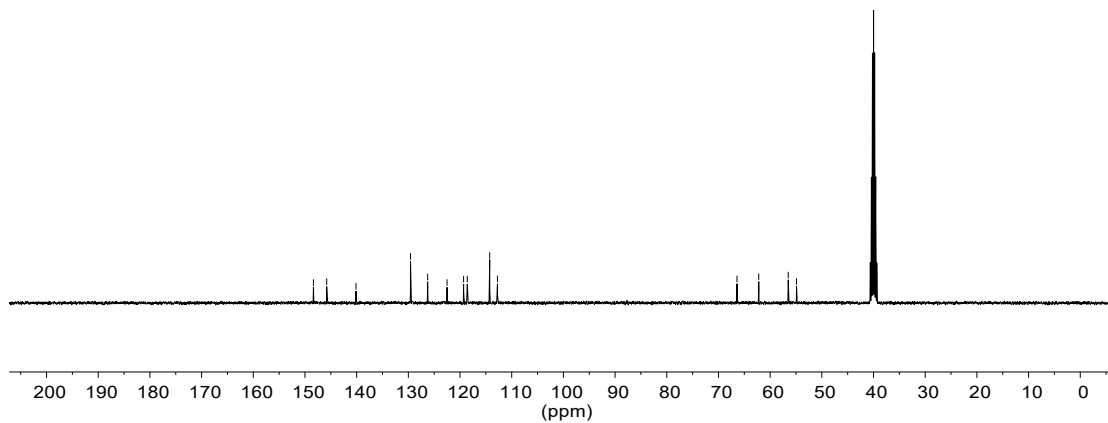

7.31  
7.29  
7.28  
7.27  
7.23  
7.22  
7.20  
7.18  
7.16  
7.14  
7.12  
6.90  
6.88  
6.86  
6.63  
6.61  
6.01  
5.99  
5.98  
5.97  
5.96  
5.95  
5.94  
5.93  
5.91  
5.47  
5.46  
5.15  
5.14  
5.13  
5.13  
5.10  
5.10  
4.99  
4.97  
4.71  
4.70  
4.02  
4.00  
3.99  
3.98  
3.97  
3.95  
3.52  
3.50  
3.48  
3.46  
3.44  
3.42  
3.40

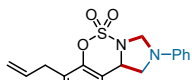

**3p:** <sup>1</sup>H NMR  
400 MHz, CDCl<sub>3</sub>

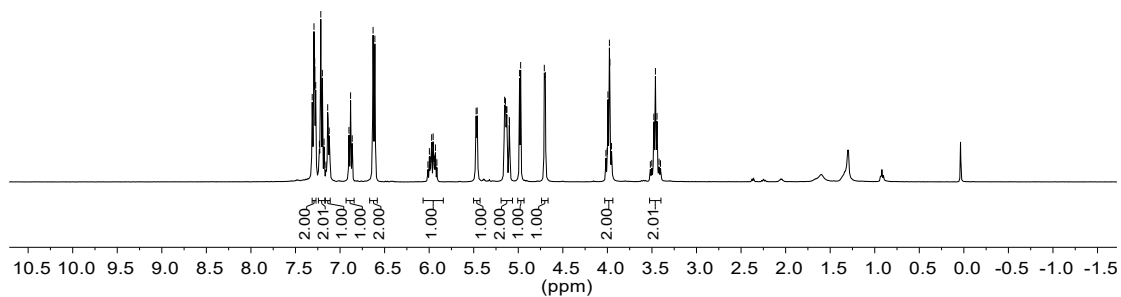

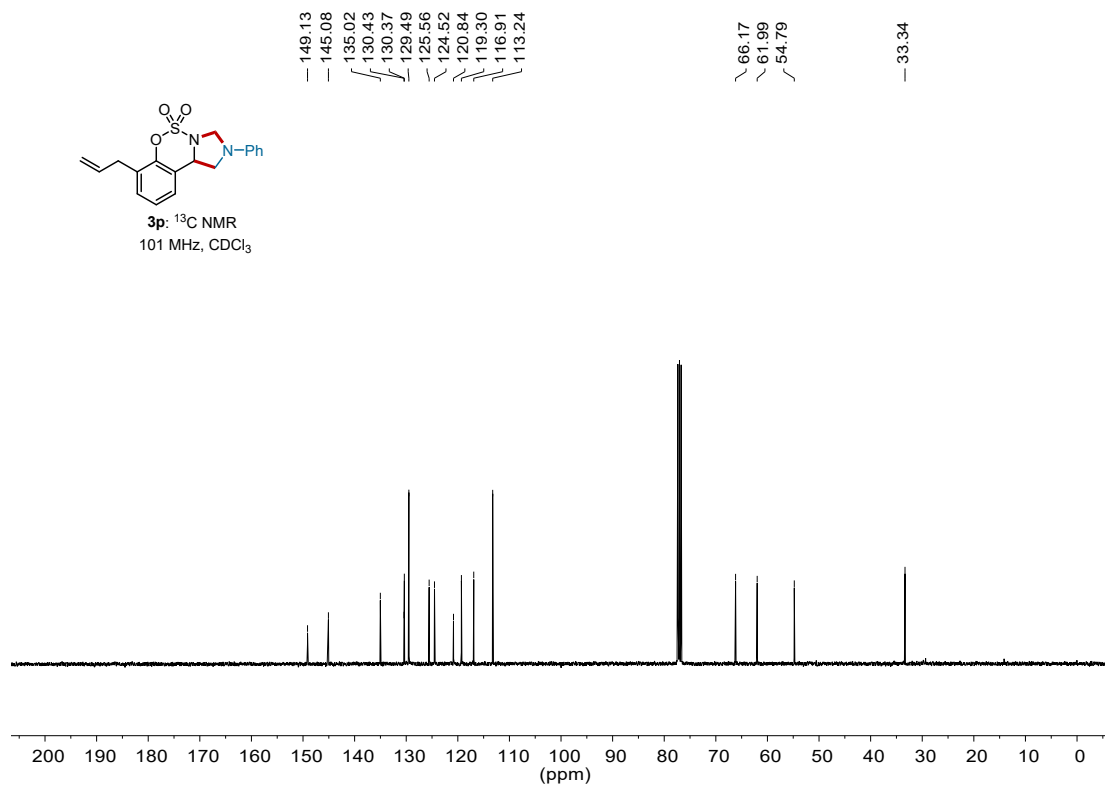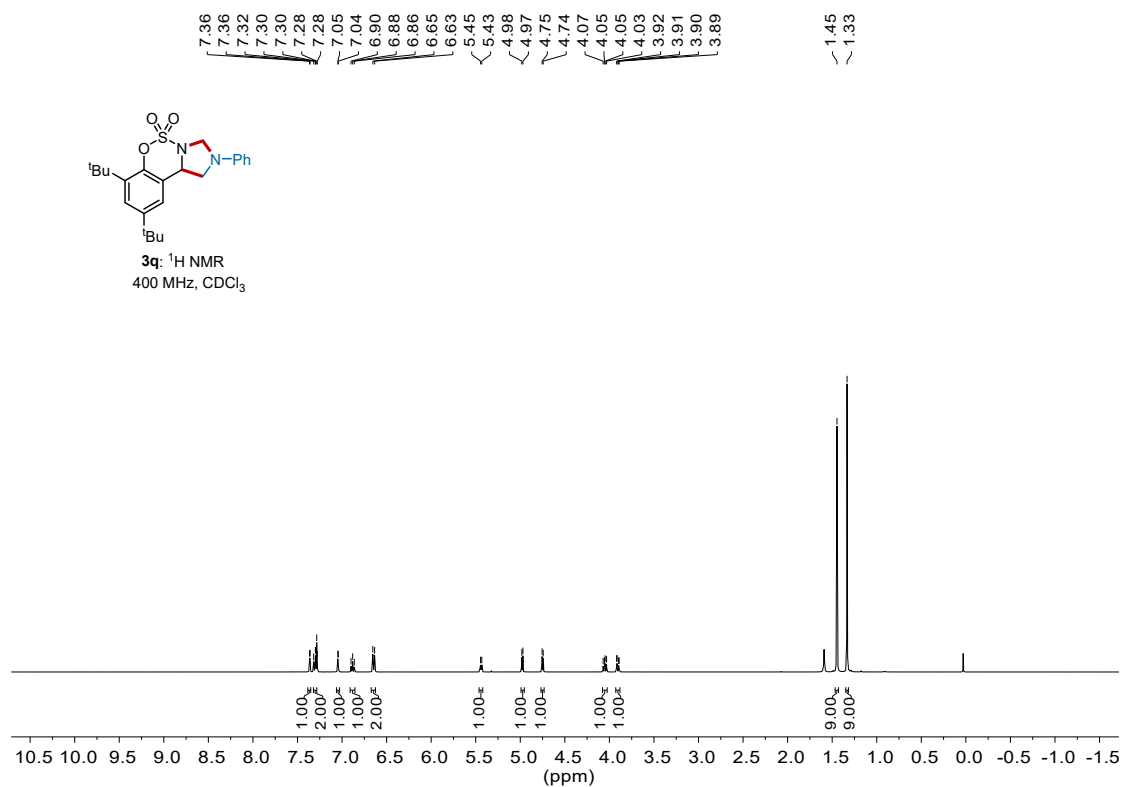

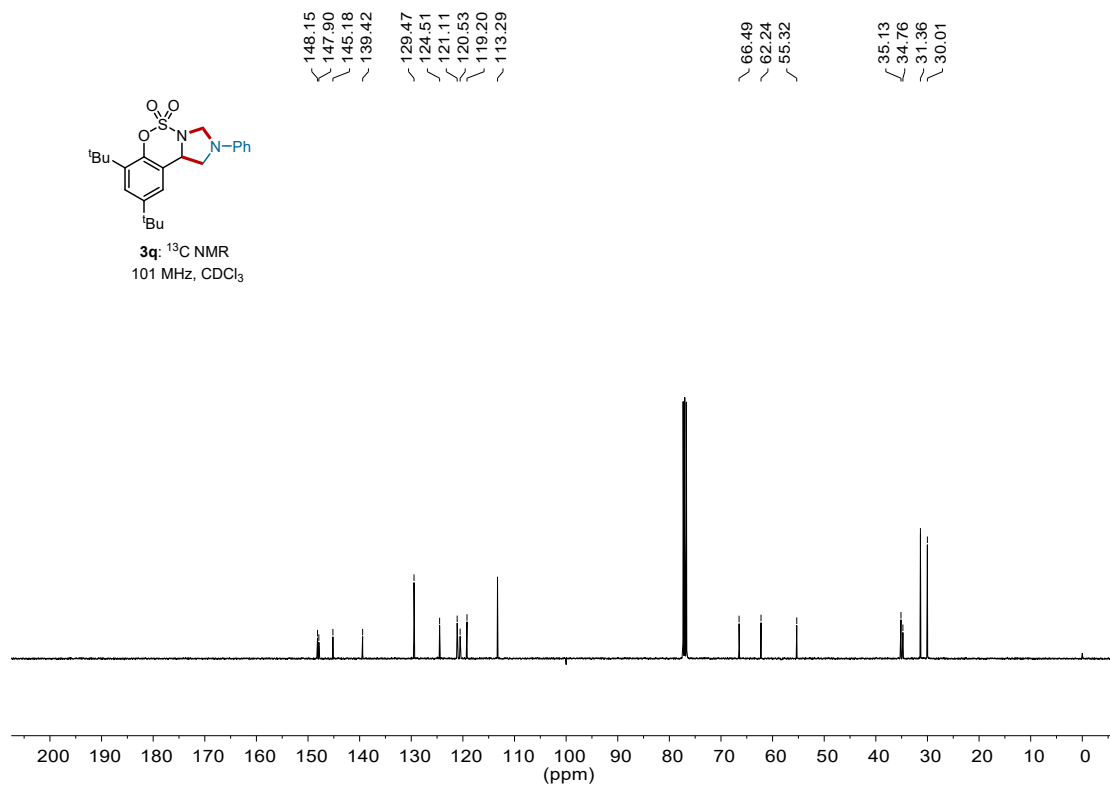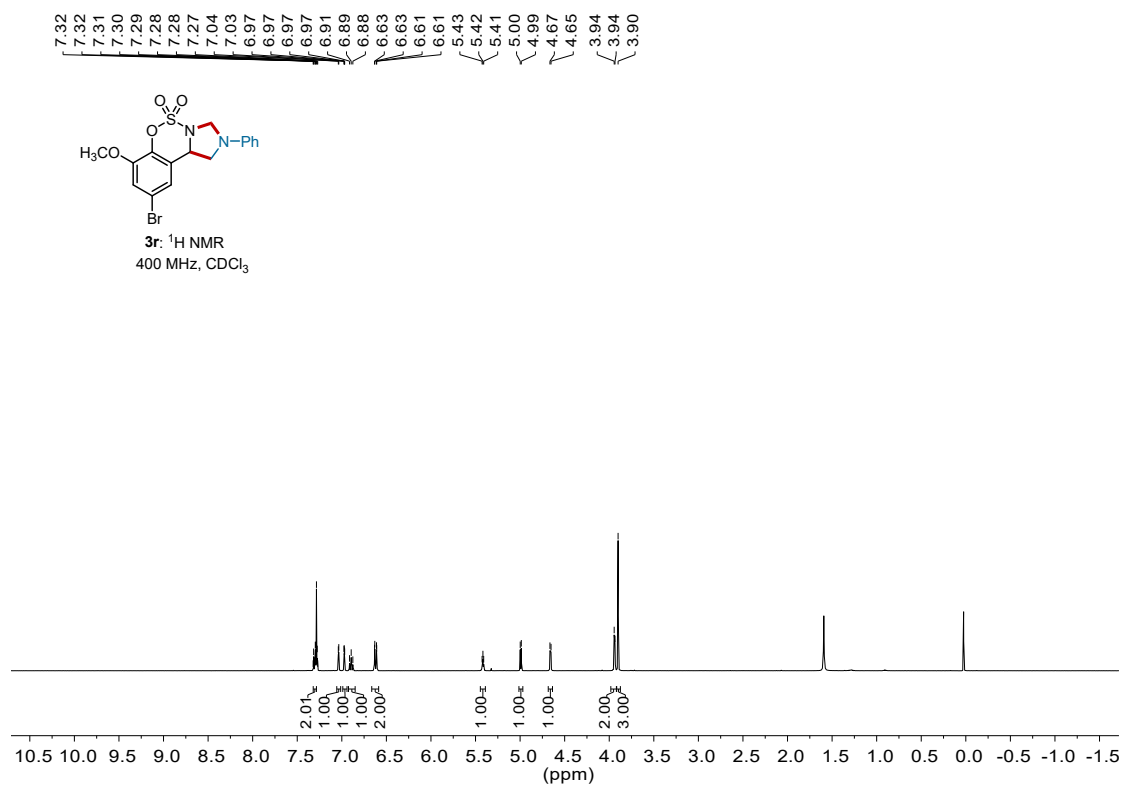

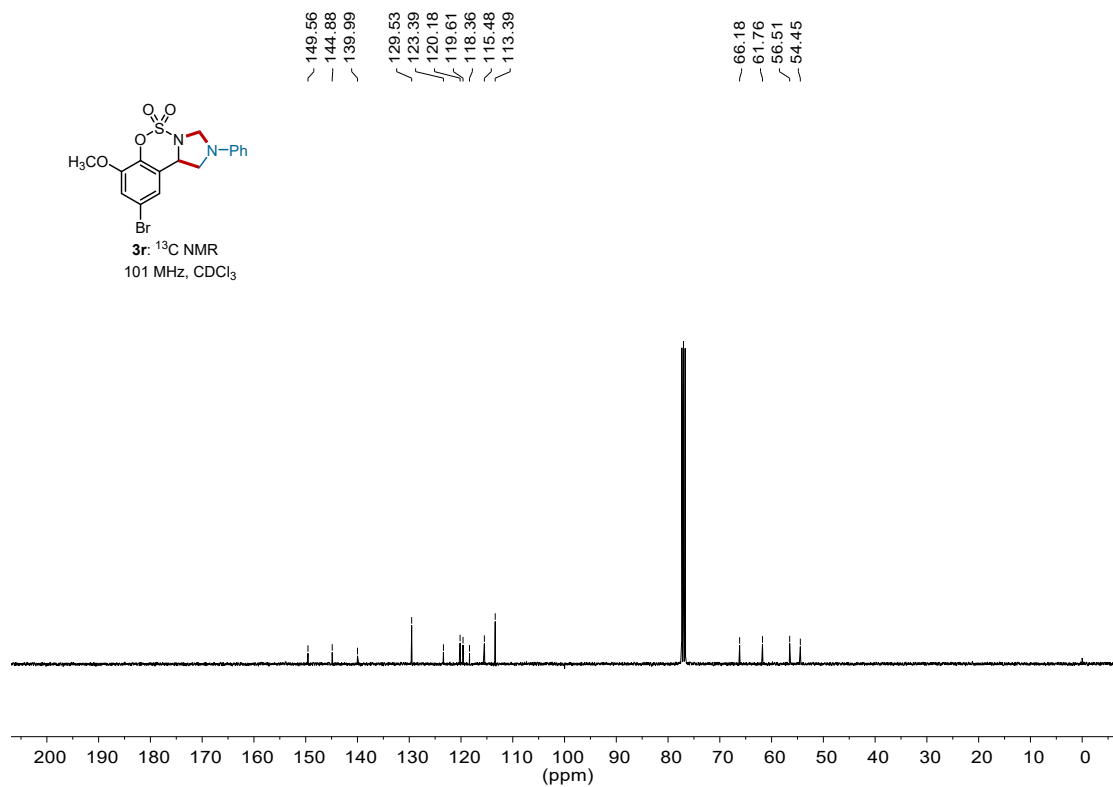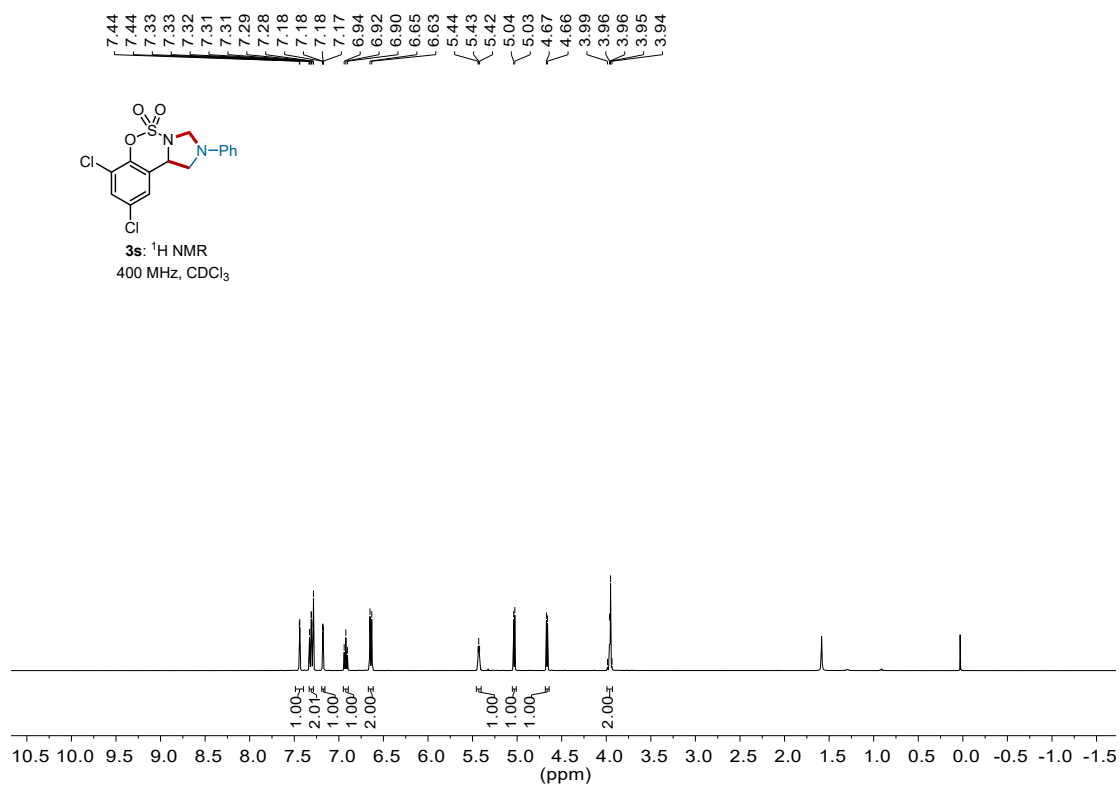

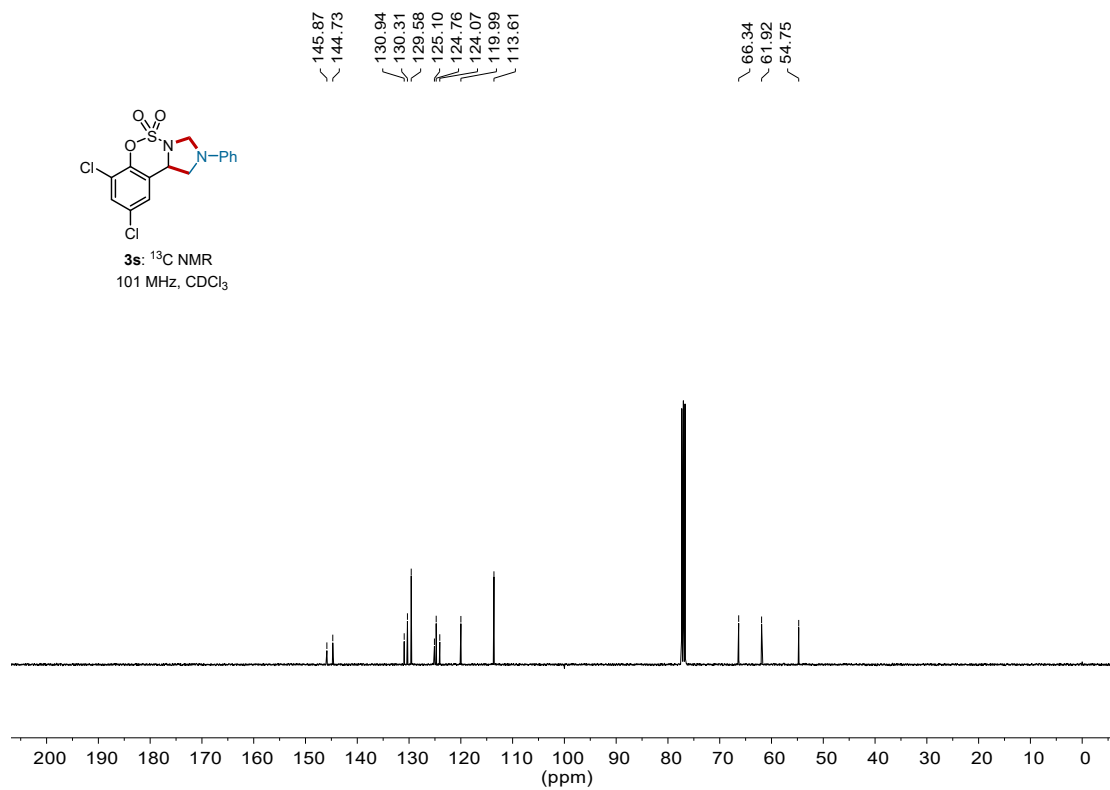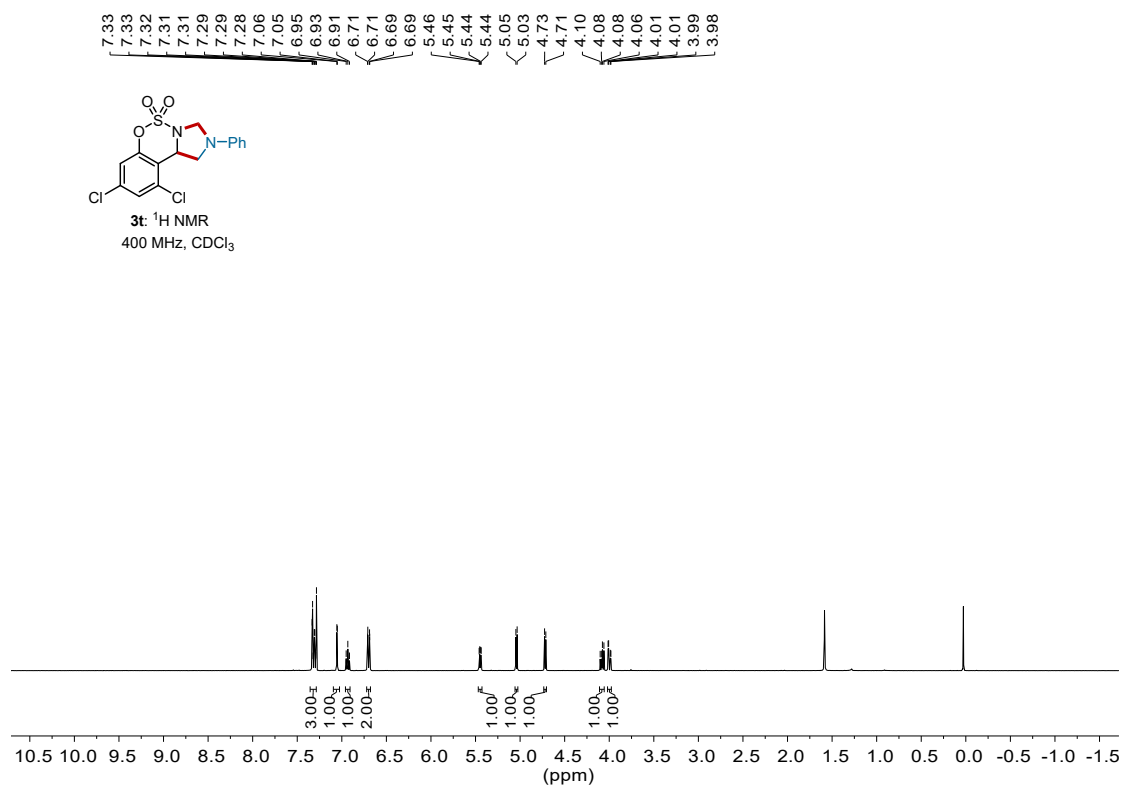

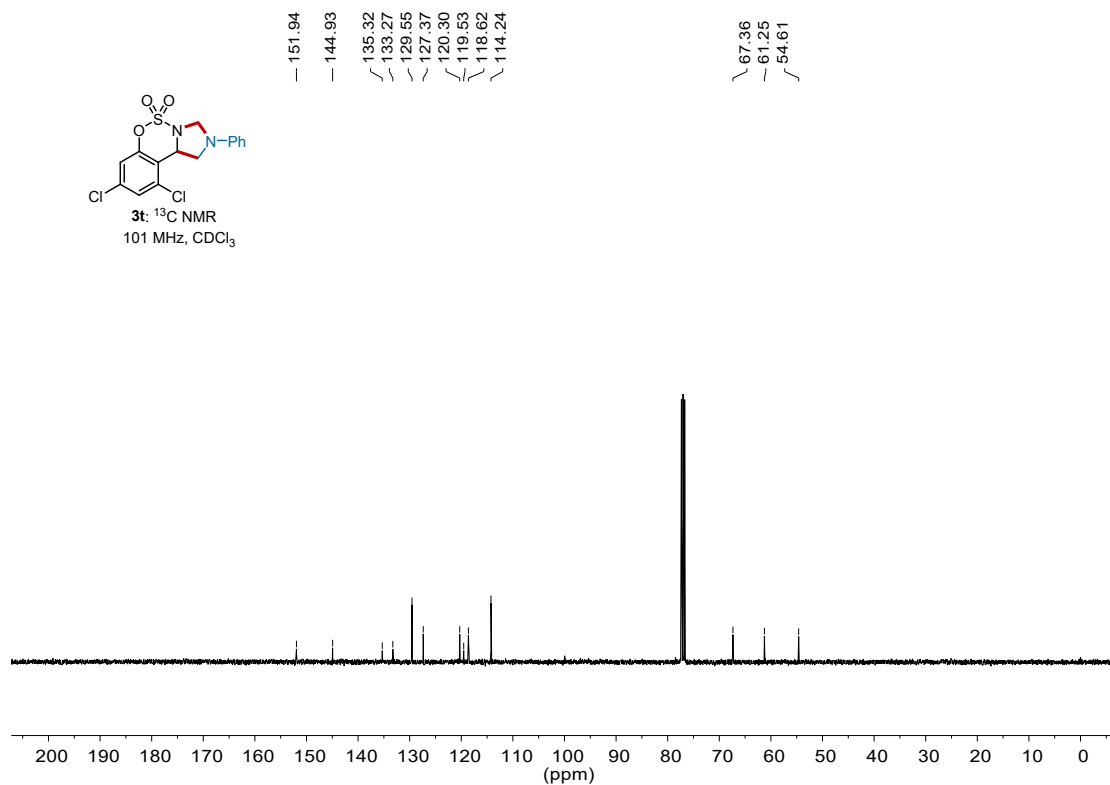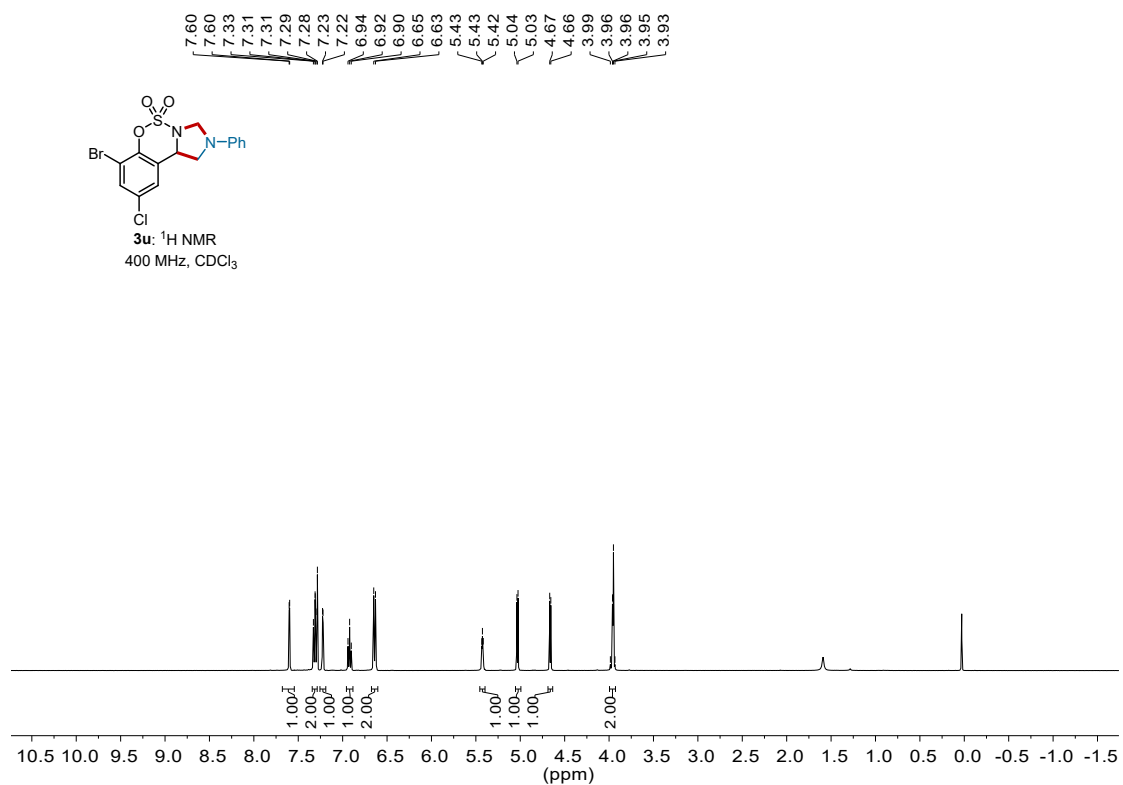

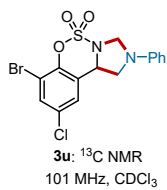

146.80  
 144.72  
 133.20  
 131.35  
 129.58  
 125.48  
 124.11  
 119.99  
 113.66  
 113.61

66.35  
 61.97  
 54.78

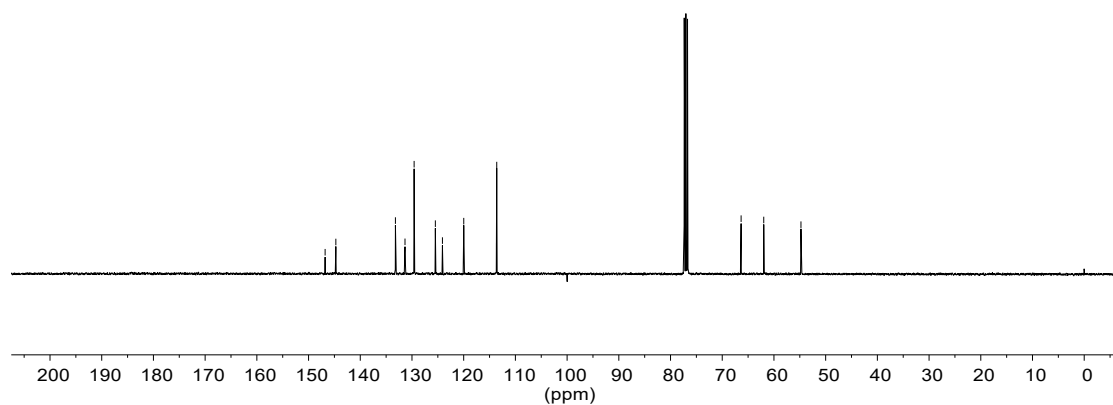

7.92  
 7.90  
 7.87  
 7.84  
 7.74  
 7.72  
 7.69  
 7.68  
 7.67  
 7.67  
 7.66  
 7.65  
 7.59  
 7.59  
 7.58  
 7.57  
 7.57  
 7.56  
 7.55  
 7.28  
 7.28  
 7.27  
 7.26  
 7.26  
 7.24  
 7.24  
 7.20  
 7.18  
 6.89  
 6.87  
 6.85  
 6.64  
 6.62  
 5.98  
 5.97  
 5.96  
 5.95  
 5.08  
 5.07  
 4.83  
 4.82  
 4.31  
 4.29  
 4.28  
 4.27  
 4.01  
 4.00  
 3.99  
 3.98

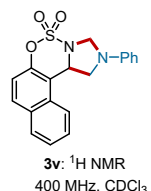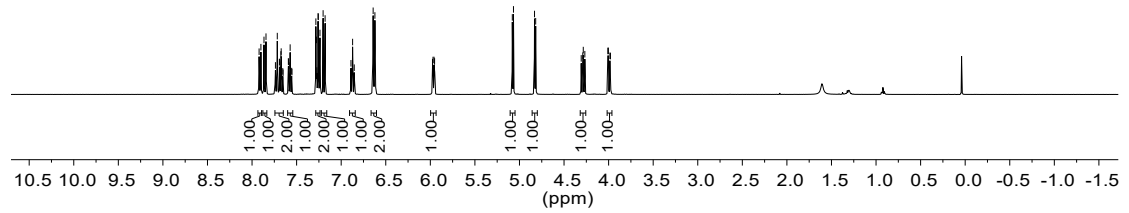

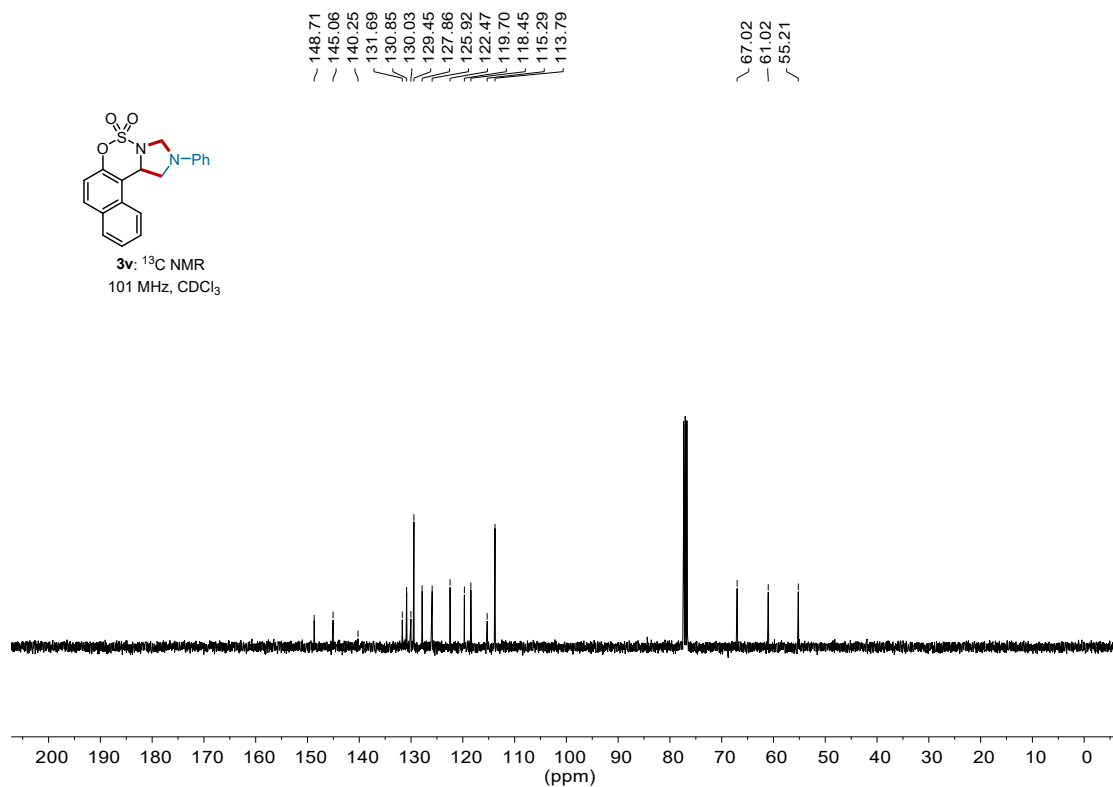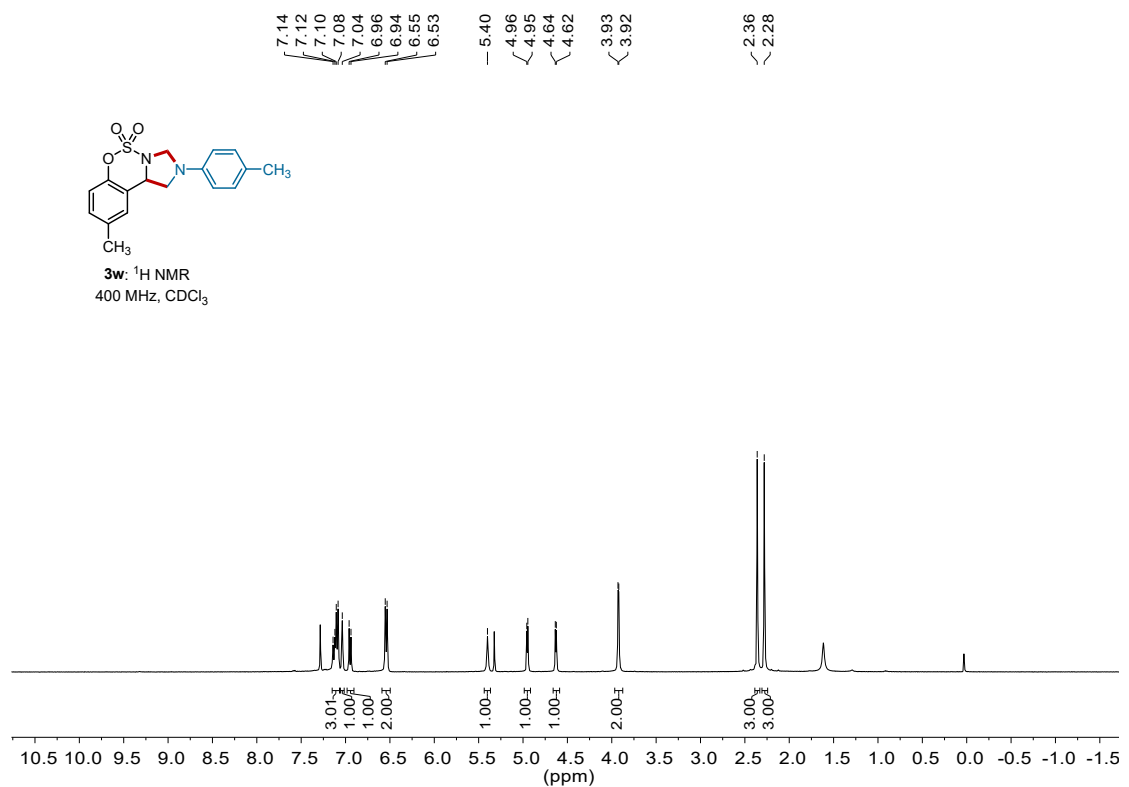



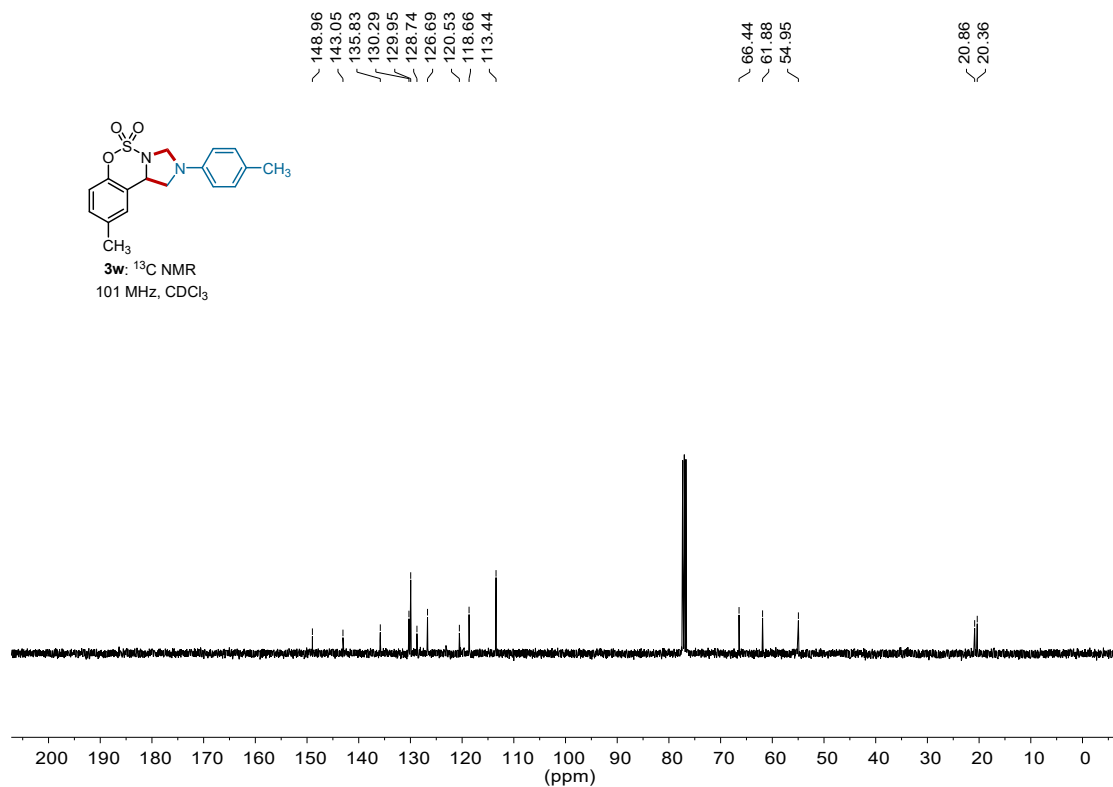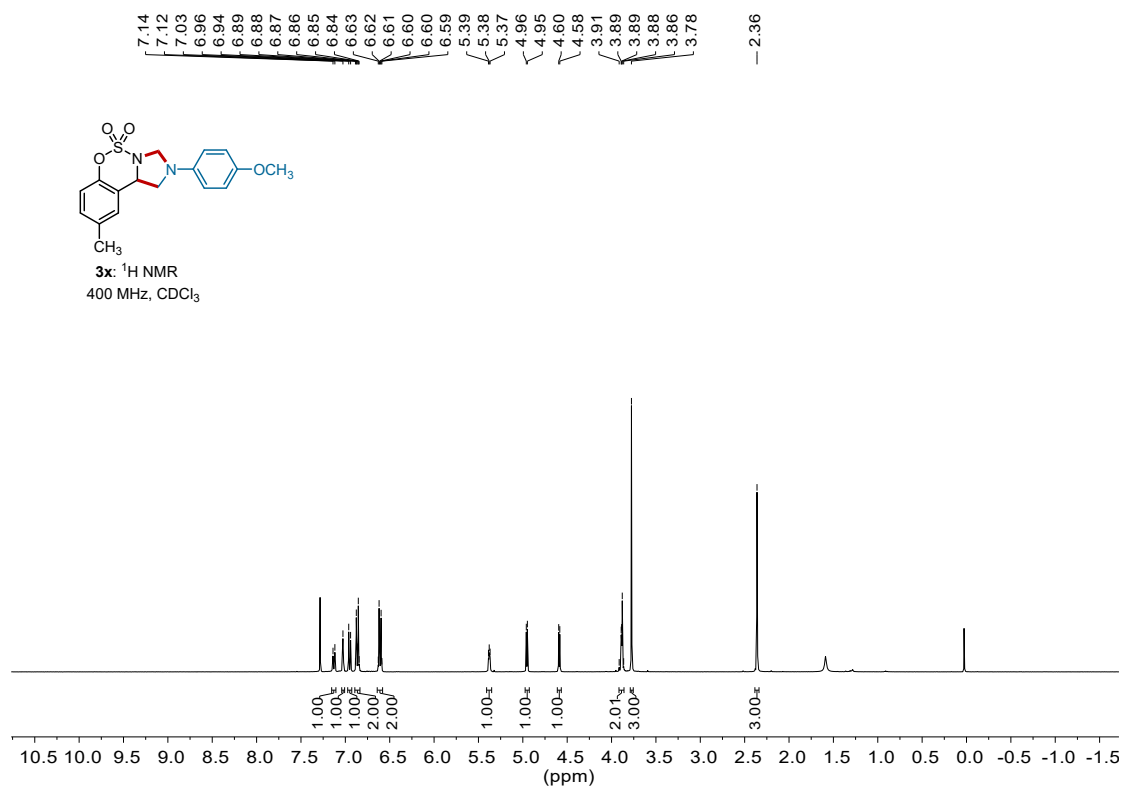

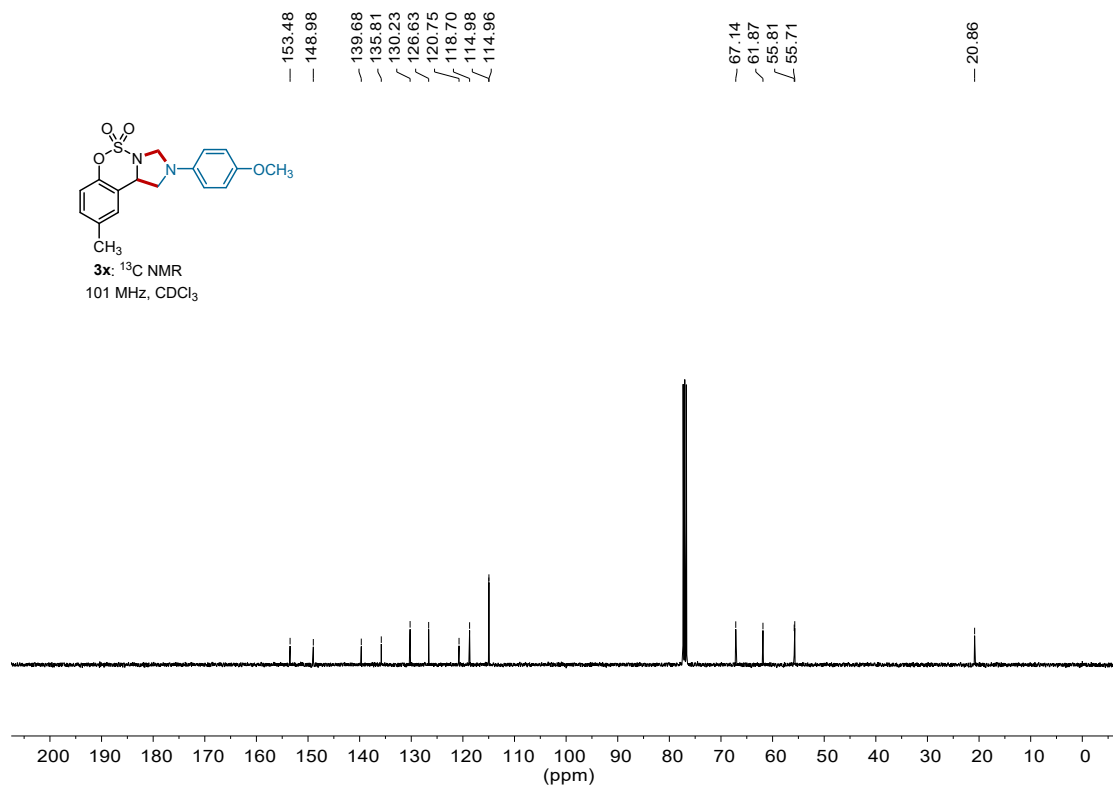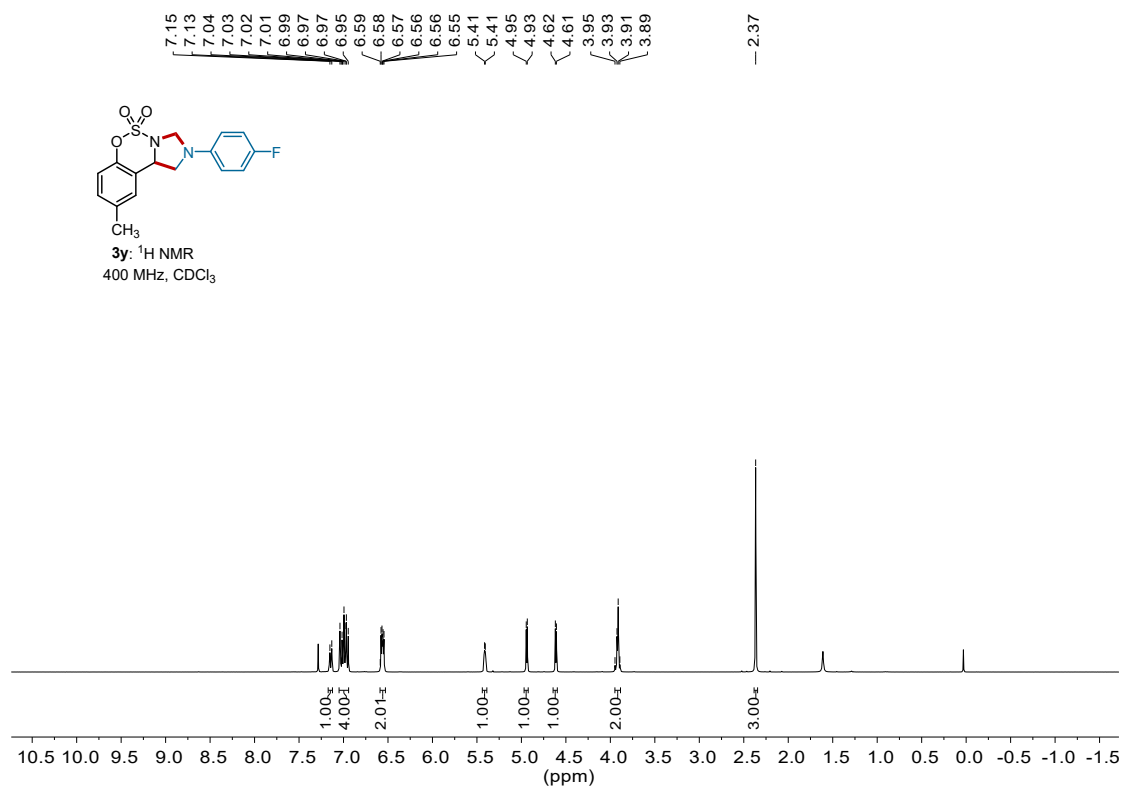

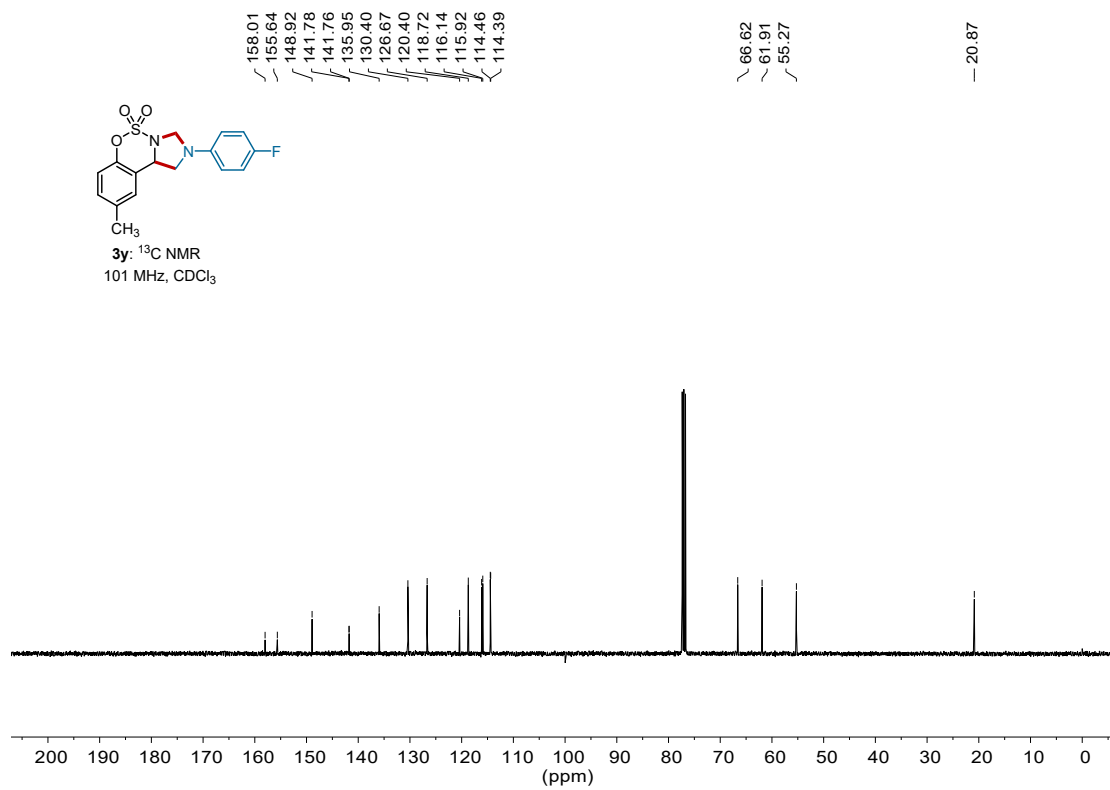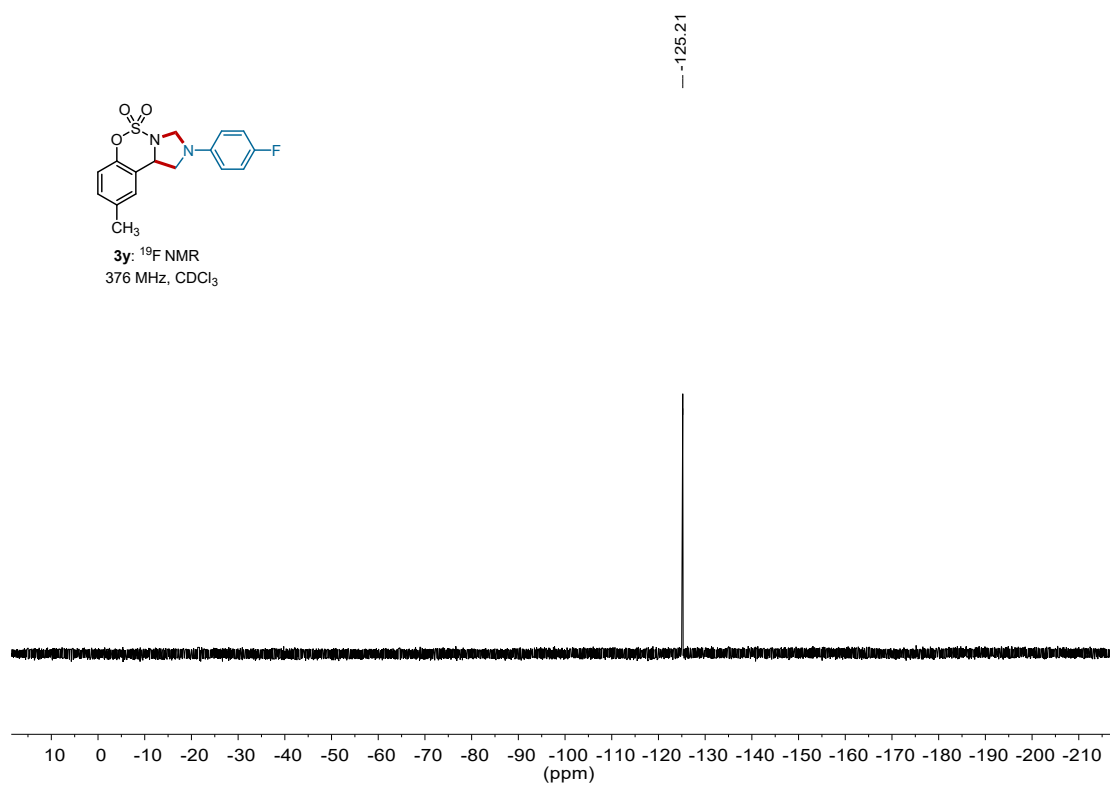

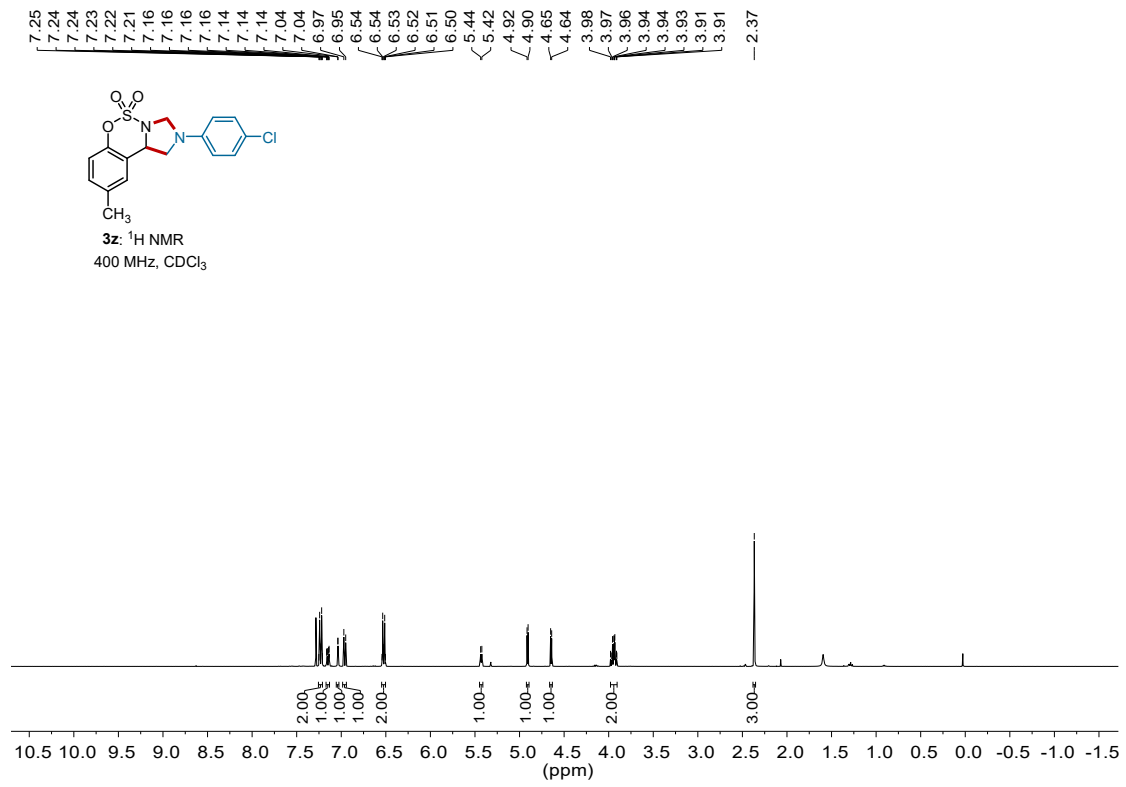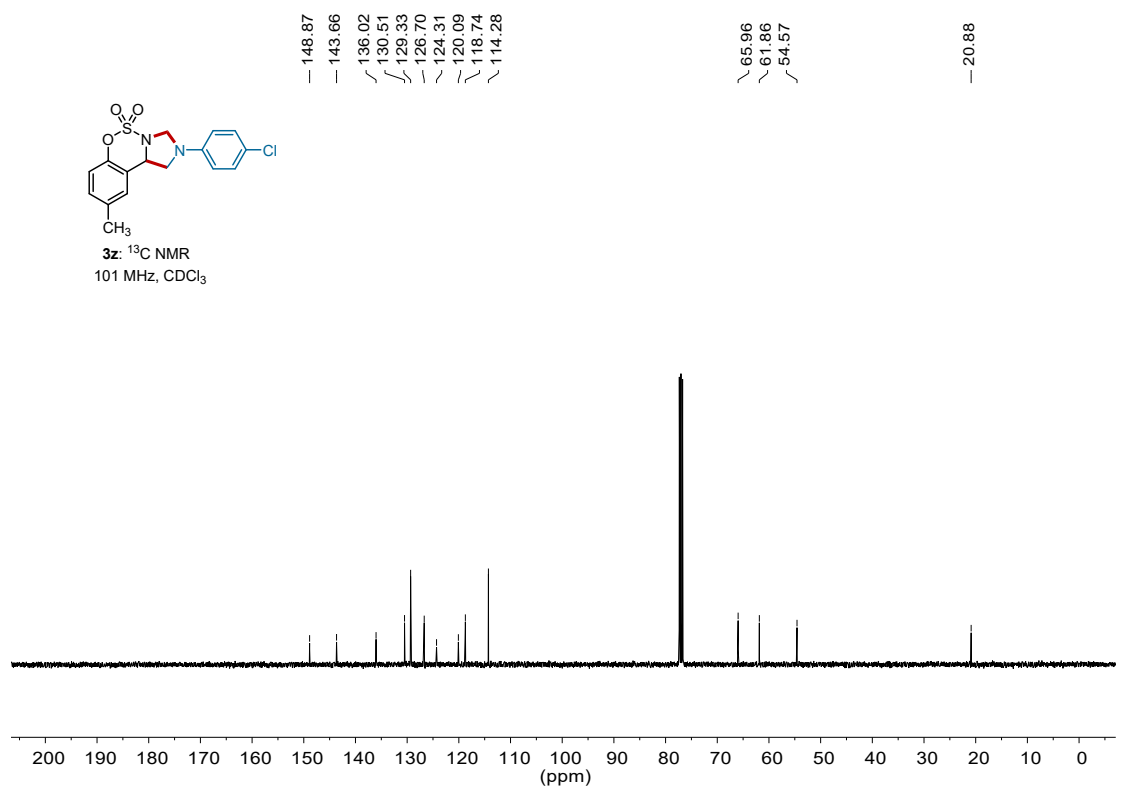

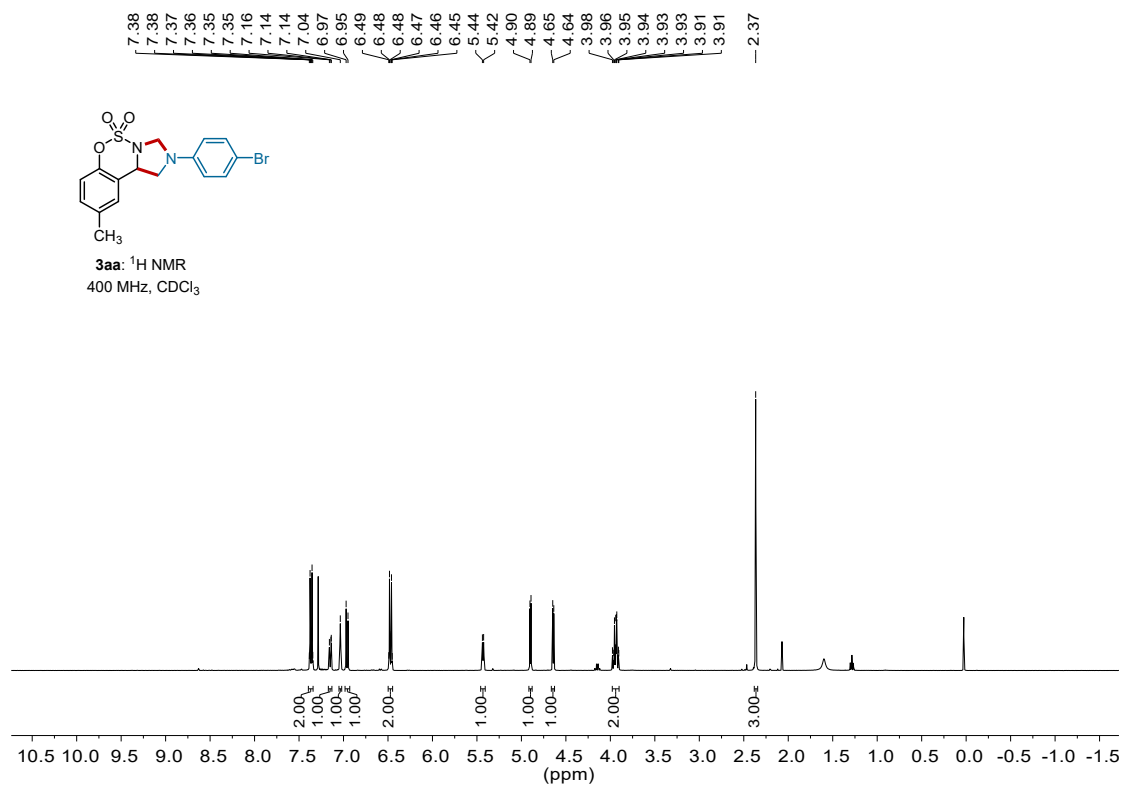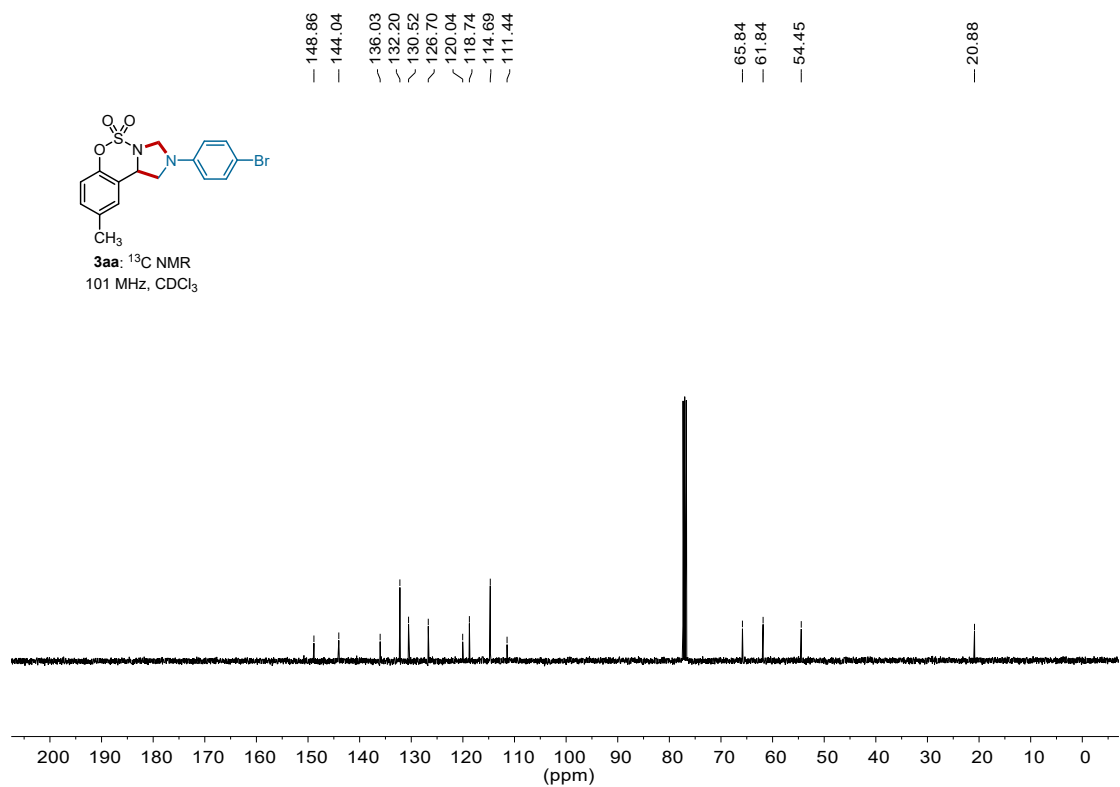

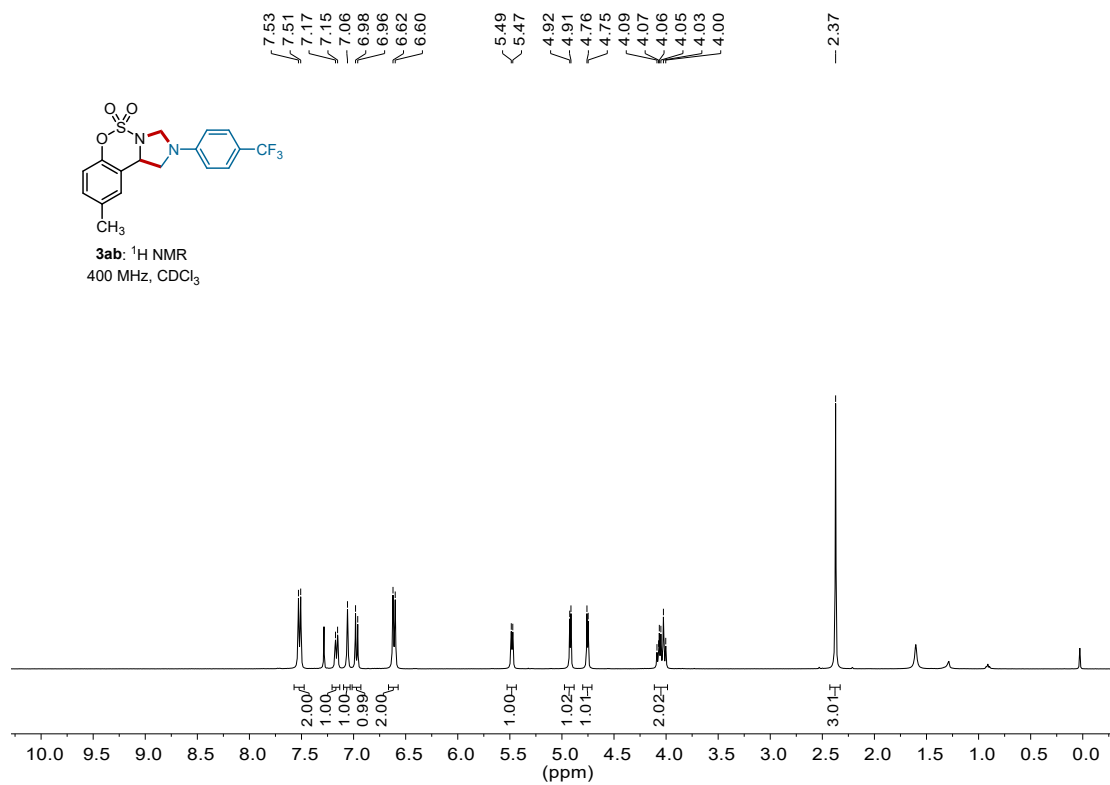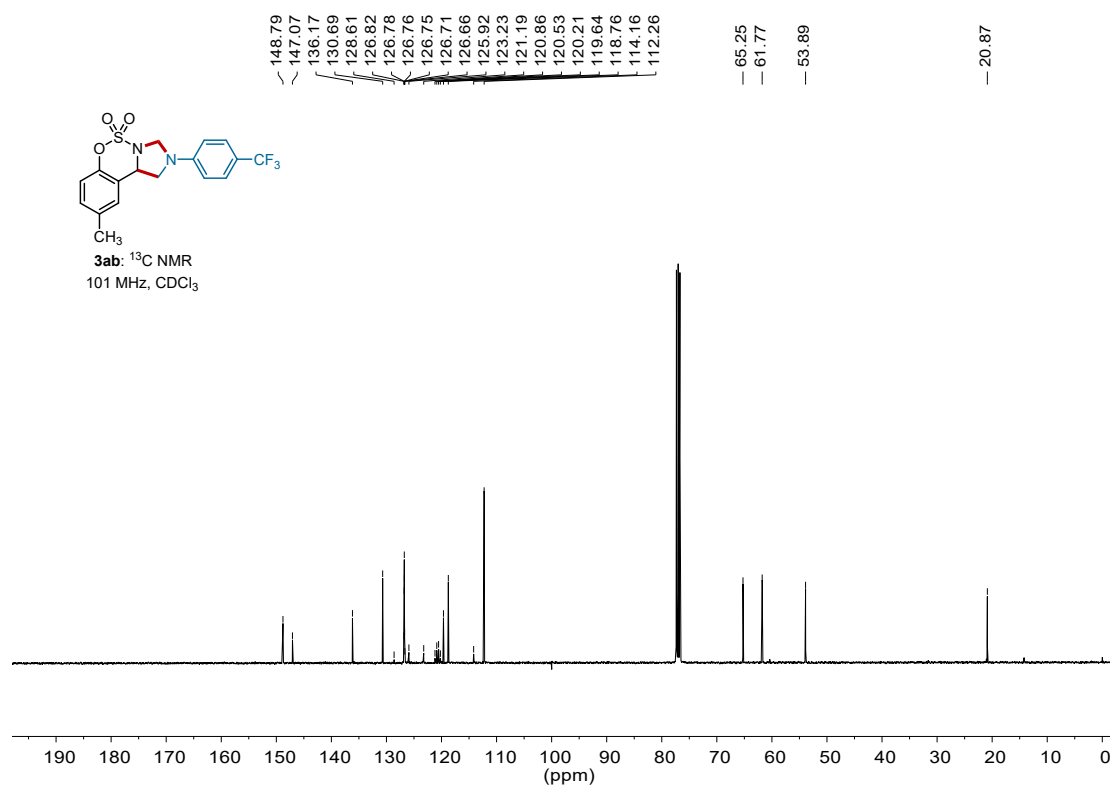

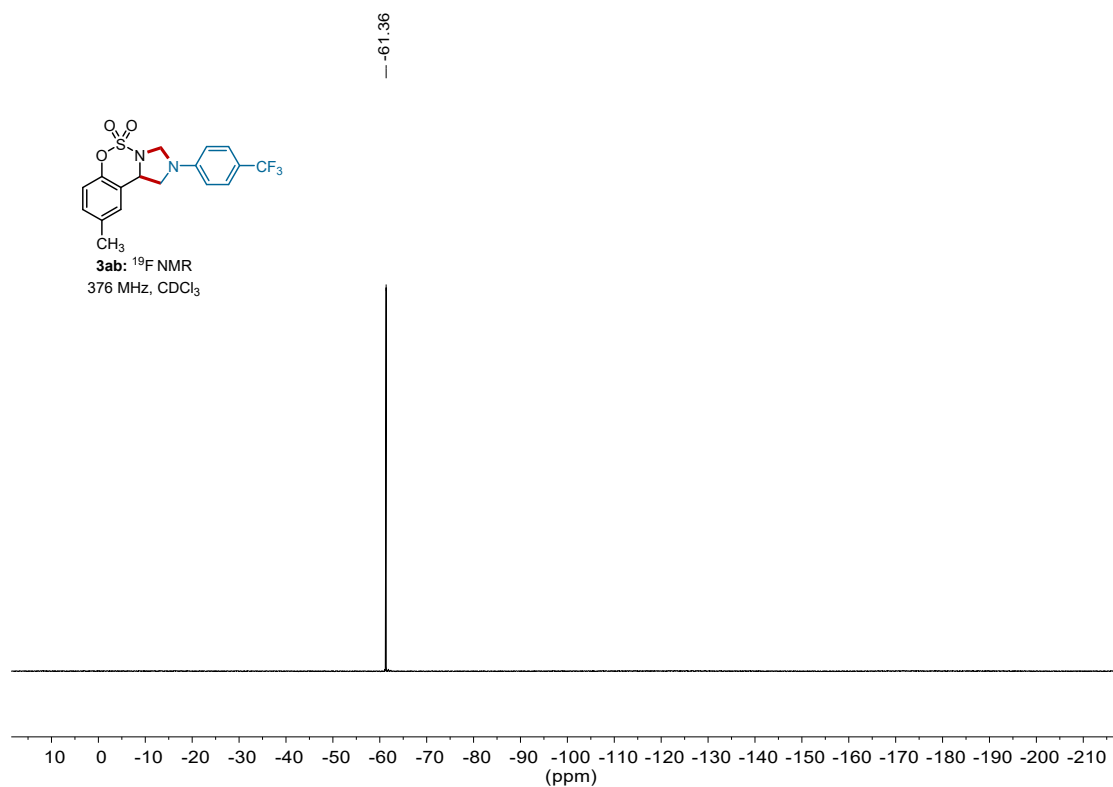

7.21  
7.19  
7.17  
7.14  
7.14  
7.14  
7.14  
7.04  
7.04  
6.97  
6.95  
6.84  
6.84  
6.82  
6.82  
6.59  
6.58  
6.58  
6.47  
6.47  
6.46  
6.45  
5.45  
5.45  
5.44  
4.91  
4.90  
4.69  
4.67  
4.28  
4.01  
4.00  
3.99  
3.97  
3.96  
3.95  
3.93  
3.93  
— 2.37

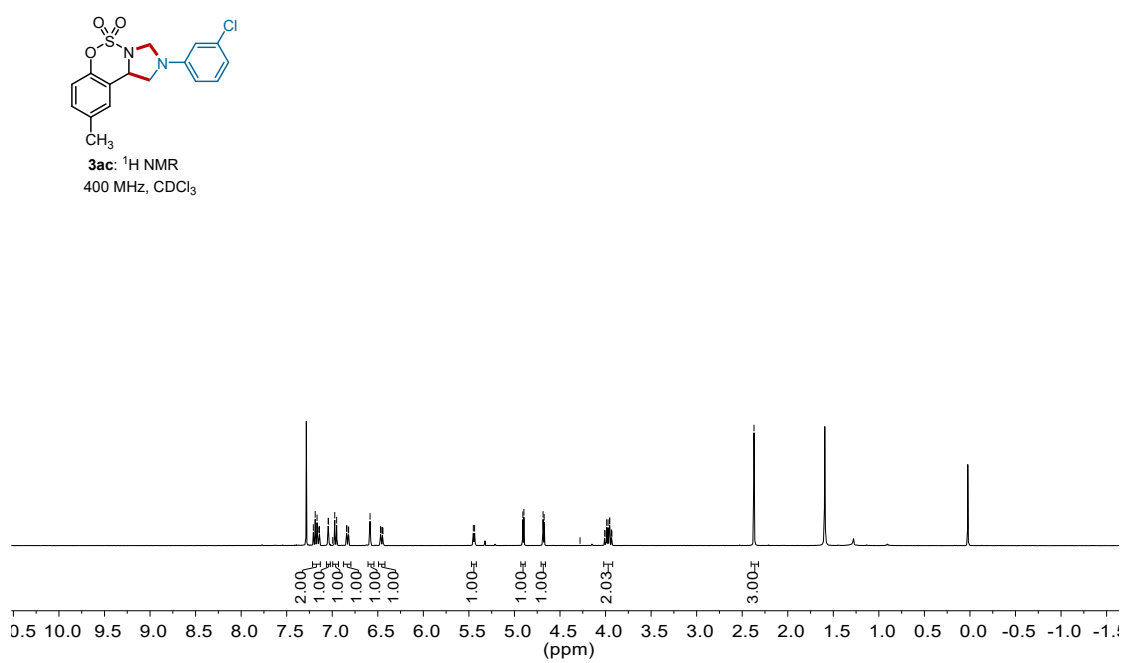

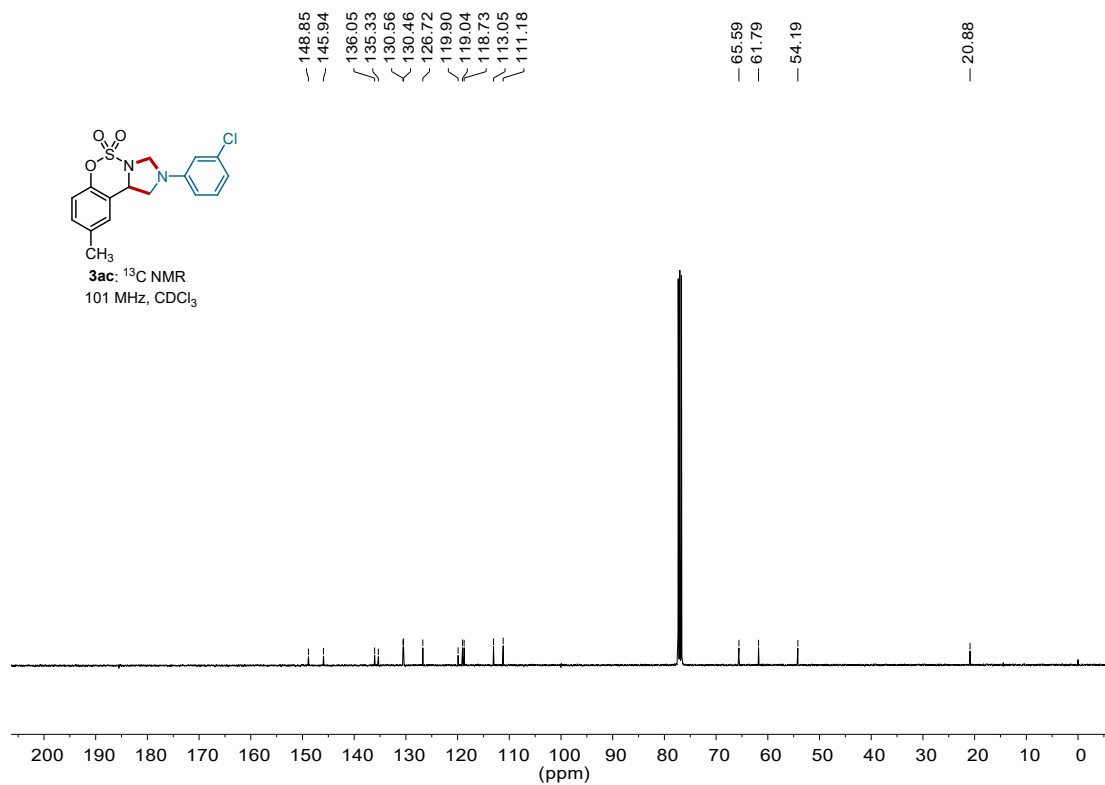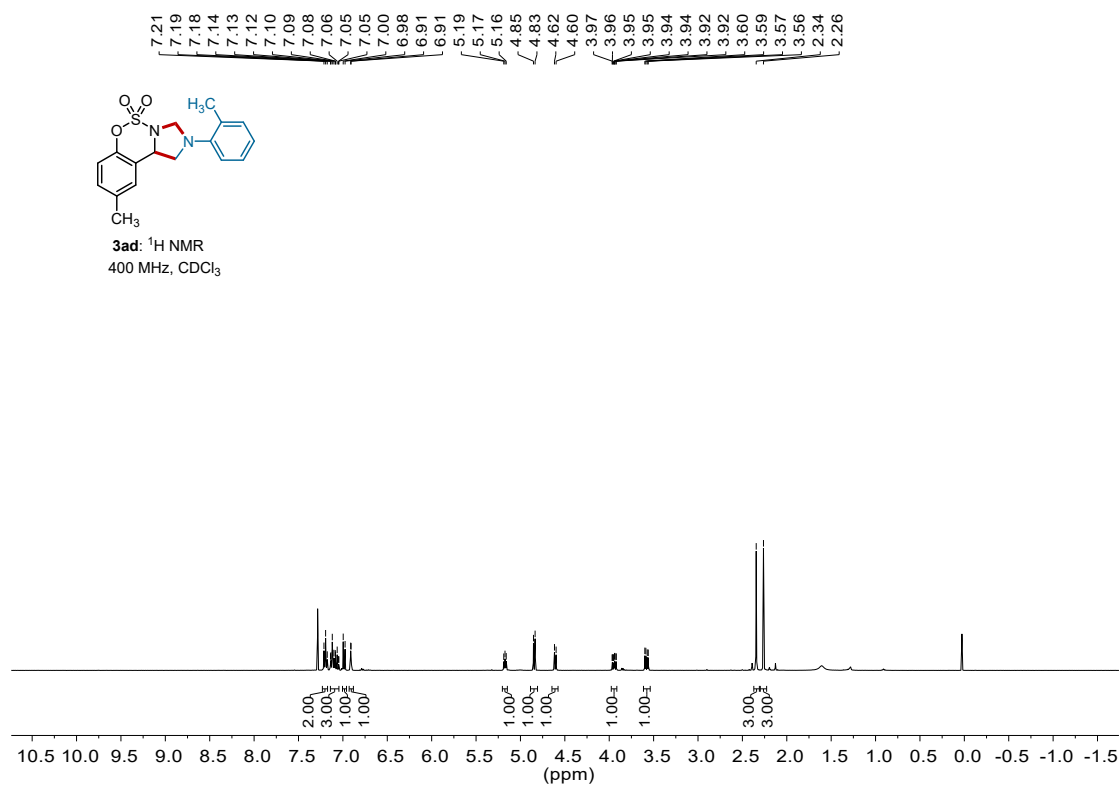



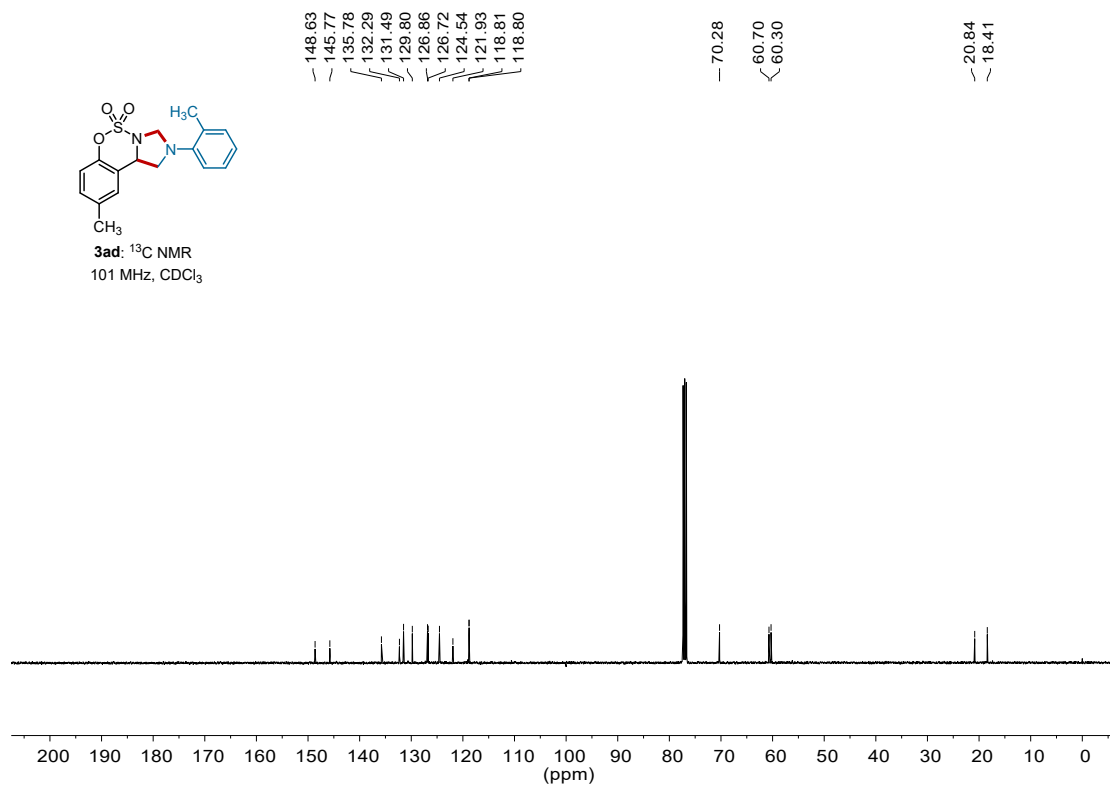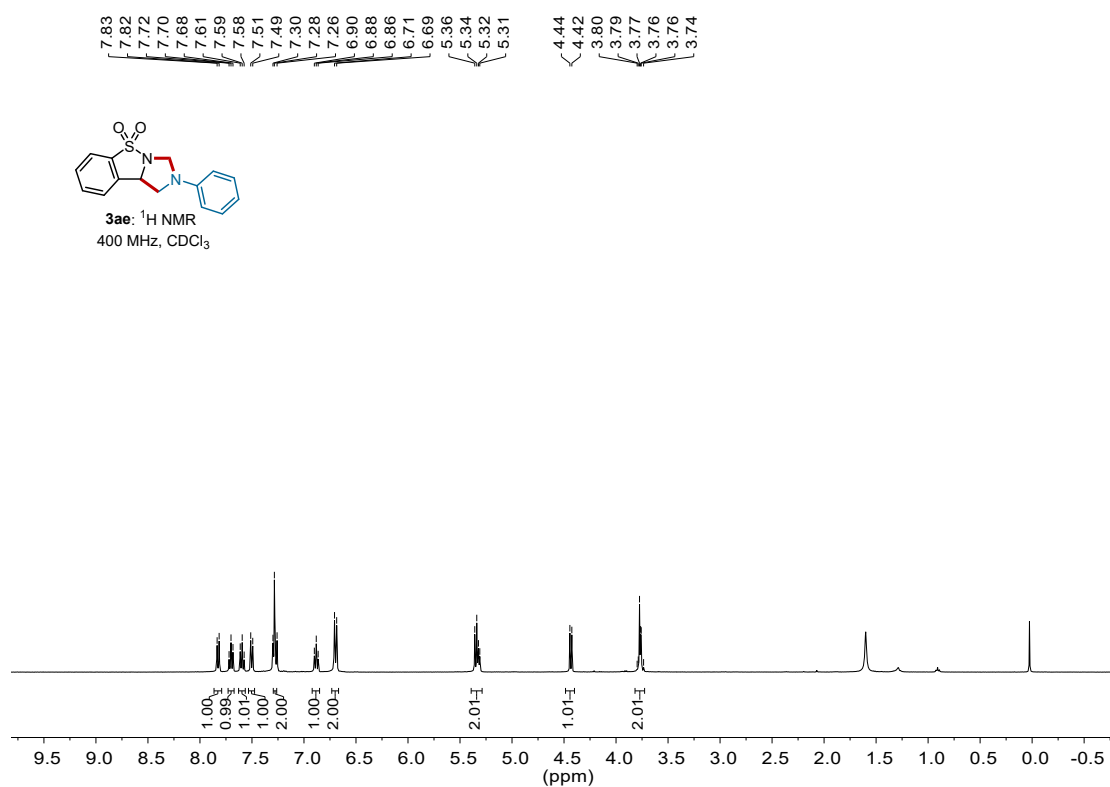

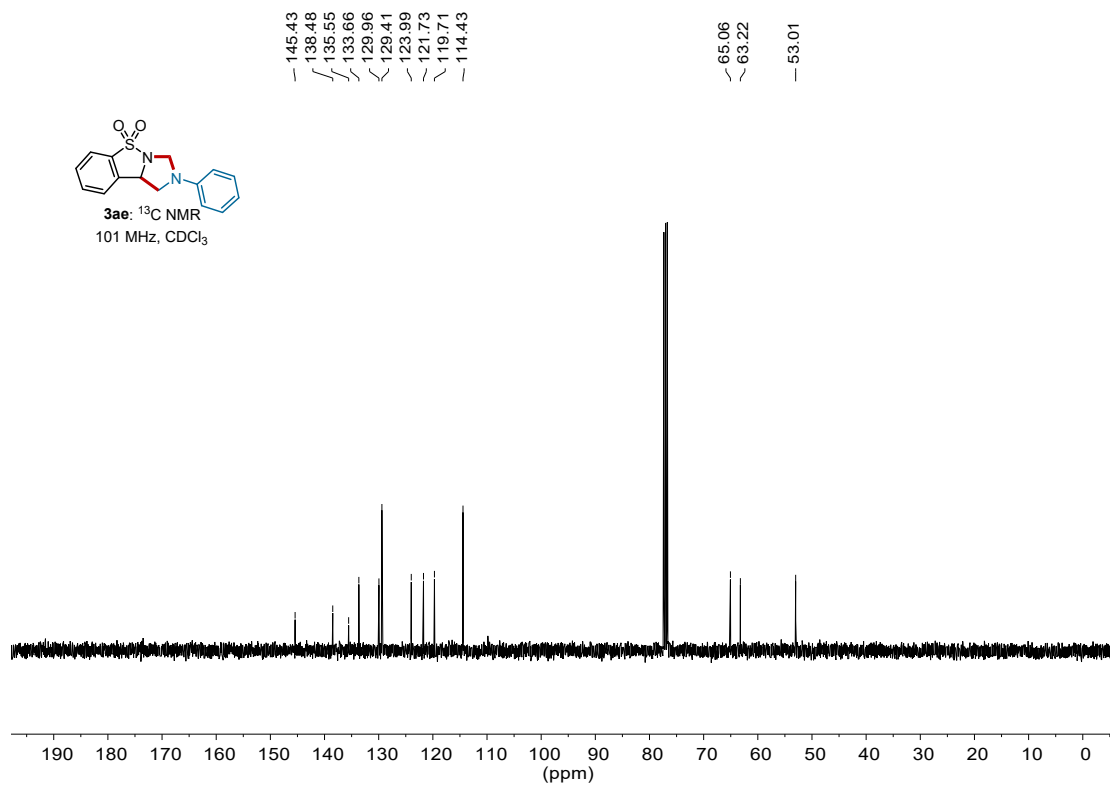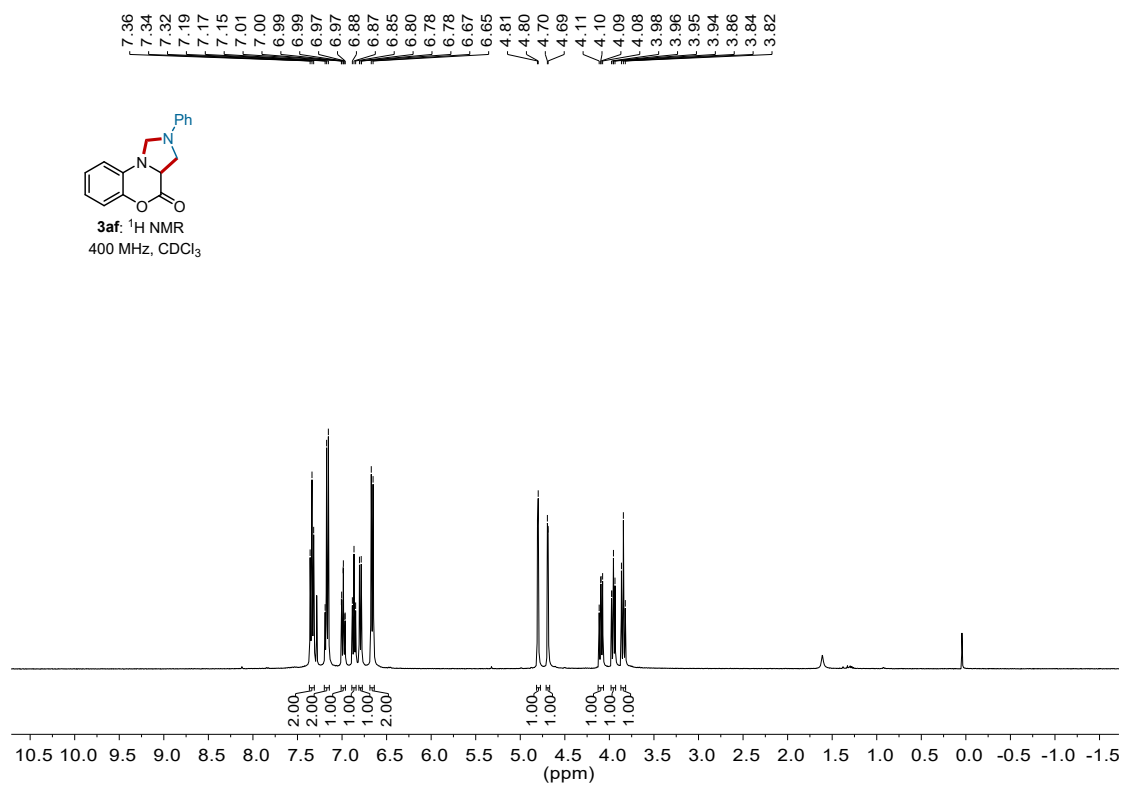

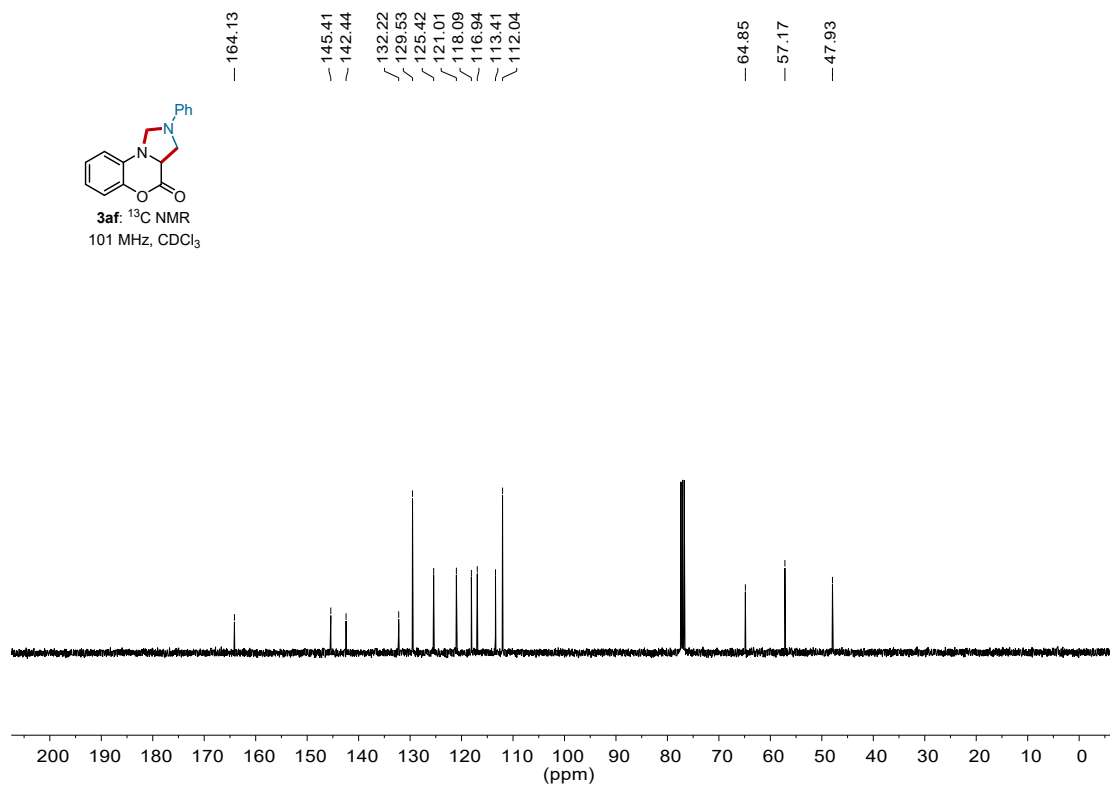

## 5. Reference

1. Yan, Z.; Wu, B.; Gao, X.; Chen, M.-W.; Zhou, Y.-G., Enantioselective Synthesis of  $\alpha$ -Amino Phosphonates via Pd-Catalyzed Asymmetric Hydrogenation. *Org. Lett.* **2016**, *18* (4), 692-695.
2. Duan, Y.; Zhang, M.; Ruzi, R.; Wu, Z.; Zhu, C., The direct decarboxylative allylation of N-arylglycine derivatives by photoredox catalysis. *Org. Chem. Front.* **2017**, *4* (4), 525-528.
